# Supplementary material for: COMPASS-mediated epigenetic regulation of transcription accelerates forgetting with age
Source: Research Square preprint supplement (doi:10.21203/rs.3.rs-9395284/v1), 2026-04-27
Supplement: Supplementary file 3 [file 290d6147c998ac86508d5112.xlsx]

## Sheet: Sheet2
Supplemetary Table 1: AWC RNA-seq- Genes expressed at 0 hour
Wormbase Gene ID	Public Name	mean(normalized counts)	Concise Description	Automated Description
WBGene00004622	rrn-3.1	6.06828e+06	rrn-3.1 (F31C3.9) encodes a 26s\/28s ribosomal RNA (rRNA), a non-coding RNA component of the large ribosomal subunit and synthesised by RNA polymerase I\; This is cleaved from a 45S precursor transcribed by RNA polymerase I\; As this forms a major component of the ribosome, it is essential for all protein synthesis in the cell.	Enriched in excretory cell\; germ line\; intestine\; and neurons based on single-cell RNA-seq studies. Is affected by several genes including nuo-6\; atfs-1\; and atp-2 based on RNA-seq studies. Is affected by six chemicals including rotenone\; multi-walled carbon nanotube\; and sesamin based on RNA-seq and microarray studies.
WBGene00006930	vit-6	372071	vit-6 encodes a vitellogenin precursor protein that is cleaved in the body cavity into two smaller yolk proteins, YP115 and YP88\; in C. elegans, vitellogenin genes exhibit stage-, sex-, and tissue-specific expression being expressed exclusively in the adult hermaphrodite intestine.	Predicted to enable lipid transporter activity. Involved in negative regulation of protein oxidation\; negative regulation of reactive oxygen species biosynthetic process\; and positive regulation of cholesterol import. Predicted to be located in extracellular region.
WBGene00006926	vit-2	358839	vit-2 encodes the vitellogenin homolog YP170\; vit-2 is expressed in the adult hermaphrodite intestine and VIT-2 is secreted into the pseudocoelomic space before being taken up by developing oocytes\; vit-2 expression is regulated in a sex-, stage-, and tissue-specific manner by the ELT-2\/GATA and MAB-3 transcription factors.	Predicted to enable lipid transporter activity. Predicted to be involved in lipid transport. Located in cytoplasmic vesicle\; vesicle lumen\; and yolk granule. Expressed in embryonic cell\; gonad\; intestine\; oocyte\; and pseudocoelom.
WBGene00001168	eef-1A.1	226095	eef-1A.1 encodes a translation elongation factor 1-alpha homolog that is required for embryonic viability, fertility, and germline maintenance\; EEF-1A.1 is identical to EEF-1A.2	Enables GTPase activity. Predicted to be involved in translational elongation. Predicted to be located in cytoplasm. Expressed in hypodermis\; intestine\; muscle cell\; and neurons. Human ortholog(s) of this gene implicated in Alzheimer's disease\; autosomal dominant intellectual developmental disorder 38\; developmental and epileptic encephalopathy 33\; and ovarian cancer. Is an ortholog of huma…
WBGene00006780	unc-44	199504	N.A.	Enables cell adhesion molecule binding activity. Involved in several processes, including axon guidance\; establishment or maintenance of cytoskeleton polarity\; and regulation of cellular component organization. Located in lateral plasma membrane. Expressed in hermaphrodite gonad\; hypodermis\; intestinal cell\; and vulval cell. Human ortholog(s) of this gene implicated in several diseases, incl…
WBGene00006929	vit-5	182932	vit-5 encodes a vitellogenin, a lipid-binding protein precursor related to vertebrate vitellogenins and mammalian ApoB-100, a core LDL particle constituent\; by homology, VIT-5 is predicted to function as a lipid transport protein\; loss of vit-5 activity via large-scale RNA-mediated interference (RNAi) screens indicates that VIT-5 is required for embryogenesis and normal rates of postembryonic g…	Predicted to enable lipid transporter activity. Predicted to be involved in lipid transport. Predicted to be located in extracellular region.
WBGene00010964	ctc-1	175919	The ctc-1 gene resides on the mitochondrial chromosome, and encodes the protein cytochrome c oxidase subunit 1\; CTC-1 functions as the catalytic subunit of the cytochrome c oxidase complex (also known as Complex IV) that is the terminal member of the electron transport chain that catalyzes the reduction of oxygen to water.	Predicted to enable heme binding activity and metal ion binding activity. Predicted to contribute to cytochrome-c oxidase activity. Predicted to be involved in aerobic respiration and respiratory electron transport chain. Located in mitochondrion.
WBGene00195017	srpr-2.2	167391	N.A.	Enriched in NSM\; anchor cell\; sensory neurons\; and ut4 based on RNA-seq and single-cell RNA-seq studies. Is affected by several genes including crh-1\; hpl-2\; and unc-30 based on RNA-seq and microarray studies. Is affected by ethanol\; Tunicamycin\; and paraquat based on RNA-seq studies.
WBGene00014472	MTCE.33	165950	MTCE.33 encodes a mitochondrial 23s ribosomal RNA (rRNA).	Enriched in anchor cell\; command interneuron\; and nerve ring neurons based on single-cell RNA-seq and RNA-seq studies. Is affected by several genes including nuo-6\; atfs-1\; and etr-1 based on RNA-seq studies. Is affected by five chemicals including Alovudine\; stavudine\; and Zidovudine based on RNA-seq studies.
WBGene00195016	srpr-2.1	161851	N.A.	Enriched in anchor cell\; germ line\; and sensory neurons based on RNA-seq studies. Is affected by several genes including etr-1\; hpl-2\; and hpx-2 based on RNA-seq and microarray studies. Is affected by manganese chloride and paraquat based on RNA-seq studies.
WBGene00004567	rrn-2.1	142000	rrn-2.1 (F31C3.11) encodes a 5.8s ribosomal RNA (rRNA), a non-coding component of the large ribosomal subunit. This is cleaved from a 45S precursor transcribed by RNA polymerase I\; As this forms a major component of the ribosome, it is essential for all protein synthesis in the cell.	Enriched in several structures, including DA neuron\; I4 neuron\; PDB\; distal tip cell\; and germ line based on RNA-seq and single-cell RNA-seq studies. Is affected by several genes including nuo-6\; atfs-1\; and etr-1 based on RNA-seq studies. Is affected by eleven chemicals including ethanol\; Nitric Oxide\; and 1-methylnicotinamide based on RNA-seq studies.
WBGene00001172	egl-3	136190	The egl-3 gene encodes a homolog of a mammalian proprotein convertase that participates in peptide secretion.	Enables FBXO family protein binding activity and serine-type endopeptidase activity. Involved in several processes, including modulation of chemical synaptic transmission\; protein processing\; and regulation of multicellular organismal process. Located in axon. Expressed in several structures, including mechanosensory neurons\; nerve ring\; pharynx\; tail\; and uv1. Used to study alcohol use dis…
WBGene00004677	rrn-3.56	123108	rrn-3.56 (F31C3.10) encodes a 26s\/28s ribosomal RNA (rRNA) fragment\; This is a partial\/pseudogenic copy of a non-coding RNA component of the large ribosomal subunit.	Enriched in DA neuron\; MC neuron\; cephalic sheath cell\; and command interneuron based on single-cell RNA-seq studies. Is affected by several genes including fzo-1\; nuo-6\; and atfs-1 based on RNA-seq studies. Is affected by eight chemicals including rotenone\; multi-walled carbon nanotube\; and allantoin based on RNA-seq studies.
WBGene00220238	ZK185.9	109919	N.A.	Is affected by several genes including xpf-1\; ints-1\; and dlc-1 based on RNA-seq studies. Is affected by glycine based on RNA-seq studies.
WBGene00002005	hsp-1	108176	hsp-1 encodes hsp70A, a member of the heat shock family of proteins\; hsp70A is closely related to the Drosophila heat inducible hsp70s and the S. cerevisiae SSA hsp70 subfamily\; the hsp-1 gene is normally expressed throughout development and upon heat-shock the hsp-1 mRNA is enhanced 2-6 fold\; down-regulation of hsp-1 via RNA interference results in a small reduction in the life-span of an age…	Enables ATP hydrolysis activity. Involved in determination of adult lifespan\; response to heat\; and retrograde transport, endosome to Golgi. Located in cytosol and nucleus. Expressed in germ line and intestine. Human ortholog(s) of this gene implicated in several diseases, including Alzheimer's disease\; autoimmune disease (multiple)\; brain disease (multiple)\; and eye disease (multiple). Is a…
WBGene00010962	ctc-3	107230	The ctc-3 gene resides on the mitochondrial chromosome, and encodes the protein cytochrome c oxidase subunit 3\; cytochrome c oxidase is the component of the respiratory chain that catalyzes the reduction of oxygen to water\; CTC-3 is one of the 3 subunits (1-3) that forms the functional core of the enzyme complex.	Predicted to enable electron transfer activity. Predicted to contribute to cytochrome-c oxidase activity. Predicted to be involved in mitochondrial electron transport, cytochrome c to oxygen. Predicted to be located in mitochondrion.
WBGene00006925	vit-1	105783	N.A.	Predicted to enable lipid transporter activity. Predicted to be involved in lipid transport. Predicted to be located in extracellular region.
WBGene00006789	unc-54	105099	unc-54 encodes a muscle myosin class II heavy chain (MHC B)\; UNC-54 is the major myosin heavy chain expressed in C. elegans and is required for locomotion and egg-laying\; in vivo and in vitro, UNC-54 interacts with ITR-1, an IP3 receptor, and this interaction may provide a link between calcium signaling and the muscle cytoskeleton\; UNC-54 is a thick filament component that is expressed in mult…	Enables actin filament binding activity and microfilament motor activity. A structural constituent of muscle. Involved in several processes, including egg-laying behavior\; muscle contraction\; and skeletal muscle myosin thick filament assembly. Located in A band and striated muscle myosin thick filament. Part of muscle myosin complex. Expressed in anal depressor muscle\; body wall musculature\; …
WBGene00022500	lfi-1	101972	lfi-1 encodes, by alternative splicing, at least four isoforms of alarge coiled-coil protein paralogous to F35D11.11, and possiblyorthologous to rootletin (the structural protein comprising ciliaryrootlets)\; LFI-1 is also homologous to the Parascaris univalens MitoticAntigen, PUMA1\; LFI-1 was initially identified in yeast two-hybrid screens for proteins that interact with the coiled-coil protei…	Located in kinetochore microtubule and nucleus. Is an ortholog of human CROCC (ciliary rootlet coiled-coil, rootletin).
WBGene00000066	act-4	90482.2	act-4 encodes an actin isoform that is most similar to act-2 in amino acid sequence\; an act-4 reporter gene is expressed in body wall and vulval muscles and the spermatheca.	Predicted to be a structural constituent of cytoskeleton. Predicted to be involved in actin cytoskeleton organization and mitotic cytokinesis. Located in striated muscle thin filament. Expressed in body wall musculature\; gonad\; spermatheca\; and vulval muscle. Human ortholog(s) of this gene implicated in several diseases, including Baraitser-Winter syndrome 1\; Baraitser-Winter syndrome 2\; and…
WBGene00022069	eel-1	88804.5	eel-1 encodes a predicted Hect E3 ubiquitin ligase that contains multiple domains of similarity to the mammalian Mcl1 ubiquitin ligase Mule\; eel-1 (enhancer of efl-1) was identified in a screen for modifiers of the transcription factor efl-1\/E2F which is involved in the generation of SKN-1 protein asymmetry in the early embryo, a process essential for proper embryonic patterning\; EEL-1 binds S…	Predicted to enable ubiquitin protein ligase activity. Involved in several processes, including asymmetric protein localization involved in cell fate determination\; hemidesmosome assembly\; and signal transduction in response to DNA damage. Predicted to be located in cytoplasm and nucleus. Expressed in several structures, including hermaphrodite gonad\; intestine\; neurons\; pharynx\; and vulva.…
WBGene00000696	col-122	84852.9	N.A.	Predicted to be a structural constituent of cuticle. Predicted to be located in membrane. Predicted to be part of collagen trimer.
WBGene00001167	eef-2	82643.5	eef-2 encodes a homolog of translation elongation factor 2 (EF-2), a GTP-binding protein essential for the elongation phase of protein synthesis\; eef-2 is required for embryogenesis and vulval morphogenesis, and is expressed during all stages of development, including the dauer larval stage.	Predicted to enable GTPase activity\; ribosome binding activity\; and translation elongation factor activity. Involved in defense response to Gram-negative bacterium and negative regulation of gene expression. Predicted to be located in cytosol. Predicted to be part of ribonucleoprotein complex. Expressed in several structures, including germ line. Human ortholog(s) of this gene implicated in sev…
WBGene00010351	cbd-1	80506.6	cbd-1 encodes a large (1319-residue) protein with 12 chitin-binding peritrophin-A domains\; cbd-1(RNAi) animals have an osmotically-sensitive embryonic lethal phenotype due to defects in eggshell synthesis\; CBD-1's multiple peritrophin-A domains might enable mechanical cross-linking of chitin\; the N-terminal region of CBD-1 forms a complex with PERM-2 and PERM-4 to promote structural integrity …	Predicted to enable chitin binding activity. Involved in eggshell formation\; positive regulation of protein localization to cell cortex\; and positive regulation of protein localization to plasma membrane. Located in cell periphery. Expressed in germ line and oocyte.
WBGene00004408	rplp-0	79286.3	rpa-0 encodes an acidic ribosomal subunit protein P0.	Predicted to enable large ribosomal subunit rRNA binding activity. Predicted to be a structural constituent of ribosome. Predicted to be involved in cytoplasmic translation. Predicted to be located in ribosome. Predicted to be part of cytosolic large ribosomal subunit. Expressed in somatic cell and tail. Is an ortholog of human RPLP0 (ribosomal protein lateral stalk subunit P0) and RPLP0P6 (ribos…
WBGene00000465	cpg-1	72483.8	cpg-1 encodes, by alternative splicing, two isoforms of a chondroitin proteoglycan\; CPG-1 contains three chitin-binding peritrophin-A domains and two mucin-like regions\; CPG-1 is individually dispensable for normal embryonic development\; however, CPG-1 and CPG-2 are jointly required for osmotic integrity of early embryos, error-free chromosomal segregation during meiosis, polar body extrusion,…	Enables chitin binding activity. Involved in several processes, including eggshell formation\; mitotic cytokinesis\; and regulation of cytokinesis. Located in external encapsulating structure. Expressed in eggshell\; germ line\; and oocyte.
WBGene00000403	casy-1	71941.2	casy-1 encodes a type I transmembrane protein with two extracellular cadherin domains and an LG\/LNS domain that is the sole C. elegans calsyntenin\/alcadein ortholog\; genetic studies indicate that in C. elegans casy-1 activity is required, in parallel to the insulin-like signaling pathway, for several types of learning, including salt chemotaxis learning, temperature learning, olfactory adaptat…	Predicted to enable calcium ion binding activity. Involved in several processes, including GABAergic synaptic transmission\; olfactory learning\; and positive regulation of synaptic vesicle transport. Located in several cellular components, including extracellular region\; neuromuscular junction\; and neuronal cell body membrane. Expressed in neurons. Is an ortholog of human CLSTN2 (calsyntenin 2…
WBGene00000693	col-119	70687	N.A.	Predicted to be a structural constituent of cuticle. Predicted to be located in membrane. Predicted to be part of collagen trimer. Human ortholog(s) of this gene implicated in several diseases, including artery disease (multiple)\; brain small vessel disease 2\; and porencephaly. Is an ortholog of human COL4A2 (collagen type IV alpha 2 chain).
WBGene00000915	hsp-90	70664.9	daf-21 encodes a member of the Hsp90 family of molecular chaperones\; DAF-21 activity is required for larval development, negative regulation of dauer larva formation, and a number of specific chemosensory behaviors, such as the response to chemicals and odorants detected by the ASE and AWC sensory neurons\; a daf-21 sensory defect can be rescued by a cyclic GMP analogue, suggesting that, in regu…	Enables several functions, including ATP hydrolysis activity\; protein phosphatase 5 binding activity\; and protein phosphatase activator activity. Involved in several processes, including determination of adult lifespan\; protein export from nucleus\; and response to stress. Located in perinuclear region of cytoplasm and protein-containing complex. Part of HSP90-CDC37 chaperone complex. Expresse…
WBGene00000754	col-181	70418	col-181 is homologous to the human gene PRO ALPHA 1(I) COLLAGEN (COL1A1\; OMIM:120150), which when mutated leads to osteogenesis imperfecta.	Predicted to be a structural constituent of cuticle. Predicted to be located in membrane. Predicted to be part of collagen trimer. Human ortholog(s) of this gene implicated in pulmonary tuberculosis. Is an ortholog of human COL5A3 (collagen type V alpha 3 chain) and MARCO (macrophage receptor with collagenous structure).
WBGene00000713	col-140	68529	N.A.	Predicted to be a structural constituent of cuticle. Predicted to be part of collagen trimer.
WBGene00000277	cab-1	67815.9	Novel protein which has a C-terminal motif weakly homologous to mouse NPDC-1 and is involved in synaptic regulation\; it is expressed in various neurons including ventral cord and tail ganglion neurons\; it physically interacts with AEX-3, which is a guanine nucleotide exchange factor for the Rab3 GTPase.	Involved in chemical synaptic transmission\; positive regulation of anterior\/posterior axon guidance\; and ventral cord development. Predicted to be located in membrane and synapse. Is an ortholog of human NPDC1 (neural proliferation, differentiation and control 1).
WBGene00000149	apl-1	66737.5	apl-1 encodes two almost identical isoforms orthologous to human Amyloid precursor protein (APP)\; although native APL-1 is predicted to be membrane-bound until proteolytically cleaved, neuronal expression of a partial N-terminal extracellular region of APL-1 alone, containing either the E1 or the E2 domain, is sufficient for APL-1's normal functions in vivo (molting and morphogenesis, pharyngeal…	Predicted to enable heparin binding activity and transition metal ion binding activity. Involved in body morphogenesis\; ecdysis, collagen and cuticulin-based cuticle\; and nematode larval development. Located in cytoplasmic vesicle\; neuron projection\; and neuronal cell body. Expressed in several structures, including epithelial cell\; excretory cell\; hermaphrodite gonad\; neurons\; and somati…
WBGene00006927	vit-3	66605.9	vit-3 encodes a vitellogenin, a precursor of the lipid-binding protein related to vertebrate vitellogenins and mammalian ApoB-100, a core LDL particle constituent (OMIM:107730)\; VIT-3 is a major yolk component, but as loss of VIT-3 activity via RNA-mediated interference (RNAi) does not result in any abnormalities, VIT-3 likely functions redundantly with other vitellogenins to provide essential n…	Predicted to enable lipid transporter activity. Predicted to be involved in lipid transport. Predicted to be located in extracellular region. Expressed in intestine.
WBGene00001189	egl-21	65982	egl-21 encodes a putative carboxypeptidase (whose homologs include humanenkephalin convertase\/carboxypeptidase E)\; EGL-21 is expressedthroughout the nervous system\; EGL-21 is required for normal synthesisof FMRFamide-like (FLP) and neuropeptide-like (NLP) peptides, and for normal egg-laying, locomotion, and defecation\; EGL-21 promotes acetylcholine release at neuromuscular junctions\; egl-21 …	Enables carboxypeptidase activity. Involved in several processes, including acetylcholine secretion, neurotransmission\; cellular response to carbon dioxide\; and regulation of multicellular organismal process. Located in axon\; cytoplasmic vesicle\; and neuronal cell body. Expressed in nervous system and uv1. Human ortholog(s) of this gene implicated in several diseases, including alcohol depend…
WBGene00015102	cpg-2	65594	cpg-2 encodes a chondroitin proteoglycan with six chitin-binding peritrophin-A domains and three mucin-like regions\; CPG-2 is individually dispensable for normal embryonic development\; however, CPG-2 and CPG-1 are jointly required for osmotic integrity of early embryos, error-free chromosomal segregation during meiosis, polar body extrusion, association of the sperm pronucleus\/centrosome compl…	Enables chitin binding activity. Involved in several processes, including eggshell formation\; mitotic cytokinesis\; and regulation of cytokinesis. Located in external encapsulating structure and perivitelline space. Expressed in eggshell.
WBGene00003902	pab-1	65312.1	pab-1 encodes a polyadenylate-binding protein (i.e., poly(A)-binding protein, or PAB)\; pab-1 is essential for germline proliferation, regulation of adult lifespan, and normal body size\; PAB-1 forms a complex with ATX-2, the C. elegans ataxin 2 ortholog, which is also required for germline development\; PAB-1 has been successfully used as an epitope-tagged transgenic reagent for tissue-specific …	Enables mRNA binding activity. Involved in several processes, including gamete generation\; positive regulation of developmental process\; and regulation of cell cycle. Located in P granule and P-body. Expressed in intestine. Is an ortholog of several human genes including PABPC1 (poly(A) binding protein cytoplasmic 1)\; PABPC3 (poly(A) binding protein cytoplasmic 3)\; and PABPC4 (poly(A) binding…
WBGene00004414	rpl-3	62322.8	rpl-3 encodes a large ribosomal subunit L3 protein required in mass RNAi assays for embryonic and larval viability, fertility, and general health\; the rpl-3 transcription unit has a nonsense transcript that is up-regulated in vivo by smg[-] mutations, indicating that rpl-3 is a natural substrate for SMG-mediated nonsense suppresssion\; several other natural mRNA substrates of SMG suppression (e.…	Predicted to enable RNA binding activity. Predicted to be a structural constituent of ribosome. Predicted to be involved in translation. Predicted to be located in cytoplasm and ribosome. Predicted to be part of cytosolic large ribosomal subunit. Human ortholog(s) of this gene implicated in dilated cardiomyopathy 2D. Is an ortholog of human RPL3 (ribosomal protein L3).
WBGene00006537	tbb-2	62149.6	tbb-2 encodes a homolog of mammalian beta-tubulin (TUBB) that is expressed at high levels in the germline\; TBB-2 is redundant for embryonic viability, due to its paralog TBB-1\; however, unlike its paralog TBB-1 it is preferred for normal microtubule severing by the katanin complex MEI-1\/MEI-2\; TBB-2 is required together with TBB-1, TBA-1, and tba-2 to make spindle structures in embryos and TB…	Predicted to enable GTP binding activity. Predicted to be a structural constituent of cytoskeleton. Involved in meiotic spindle organization. Located in spindle microtubule. Expressed in several structures, including germ line\; gonad\; oocyte\; tail\; and touch receptor neurons. Human ortholog(s) of this gene implicated in complex cortical dysplasia with other brain malformations 1 and congenita…
WBGene00003741	nlp-3	61115.1	nlp-3 encodes a neuropeptide-like protein of the GFxGF family with similarity to orcokinins, highly conserved peptides native to crustaceans that enhance hindgut contractions\; NLP-3 is expressed in neurons in the head, pharynx, and vulva, and in the intestine\; the precise role of NLP-3 in nervous system function and development is not yet clear.	Predicted to be involved in neuropeptide signaling pathway. Expressed in alimentary muscle\; intestine\; neurons\; oocyte\; and vulva.
WBGene00019540	epic-2	60439.5	N.A.	Enriched in germ line\; hypodermis\; interfacial epithelial cell\; and vulC based on RNA-seq and single-cell RNA-seq studies. Is affected by several genes including nuo-6\; numr-2\; and numr-1 based on microarray and RNA-seq studies. Is affected by seventeen chemicals including methylmercury hydroxide\; multi-walled carbon nanotube\; and D-glucose based on RNA-seq and microarray studies.
WBGene00006439	ant-1.1	60112.3	ant-1.1 encodes one of four C. elegans mitochondrial adenine nucleotide transporters\; by homology, ANT-1.1 is predicted to facilitate ADP\/ATP exchange between the cytosol and mitochondria\; ant-1.1 is an essential gene, required for embryogenesis as well as for normal postembryonic body size and adult lifespan\; in addition, ANT-1.1 plays a critical role in promoting somatic and germline progra…	Predicted to enable ATP:ADP antiporter activity. Involved in determination of adult lifespan\; mitochondrion organization\; and positive regulation of apoptotic process. Located in mitochondrion. Expressed in several structures, including body wall musculature\; hermaphrodite somatic gonadal cell\; intestine\; pharynx\; and vulva. Used to study mitochondrial metabolism disease. Human ortholog(s) …
WBGene00020854	nrsn-1	59446.5	N.A.	Predicted to be involved in nervous system development. Predicted to be located in neuron projection\; neuronal cell body\; and transport vesicle.
WBGene00002048	ida-1	59088.8	ida-1 encodes a protein tyrosine phosphatase-like receptor, orthologous to the mammalian type I diabetes autoantigens IA-2 and phogrin that are expressed in dense core vesicles of neuroendocrine tissue and involved in regulated protein secretion\; in C. elegans, IDA-1 appears to be required for regulating presynaptic neurotransmission and in particular, for the neuropeptidergic control of egg-lay…	Predicted to enable transmembrane receptor protein tyrosine phosphatase activity. Involved in positive regulation of anterior\/posterior axon guidance\; positive regulation of neurotransmitter secretion\; and ventral cord development. Located in dense core granule and synapse. Expressed in several structures, including buccal cavity\; neurons\; preanal ganglion\; somatic nervous system\; and uv1.…
WBGene00011392	sbt-1	57484.2	sbt-1 encodes the C. elegans ortholog of the neuroendocrine chaperone 7B2\; by homology, SBT-1 is predicted to function in the maturation\/activation of the EGL-3\/PC2 proprotein convertase\; accordingly, mass spectrometry analysis indicates that sbt-1 activity is required for production of some neuropeptides\; sbt-1 mutant animals are also aldicarb resistant, suggesting that SBT-1 is required fo…	Enables peptidase activator activity and peptidase inhibitor activity. Involved in regulation of muscle contraction. Predicted to be located in extracellular region and secretory granule. Expressed in neurons and pharynx. Is an ortholog of human SCG5 (secretogranin V).
WBGene00006803	unc-70	56696.6	unc-70 encodes two isoforms of a beta-spectrin ortholog required for normal body curvature and shape, normal movement, and correct localization of the alpha-spectrin SPC-1\; the predominant UNC-70 isoform is expressed in all embryonic cells except the intestine, at the plasma membrane at sites of intercellular contact\; UNC-70 becomes largely restricted to muscles and neurons from hatching to adu…	Predicted to enable actin filament binding activity. Involved in several processes, including dendrite development\; embryonic body morphogenesis\; and muscle cell cellular homeostasis. Located in cell junction\; contractile muscle fiber\; and lateral plasma membrane. Expressed in hermaphrodite gonad and vulval cell. Human ortholog(s) of this gene implicated in autosomal recessive spinocerebellar…
WBGene00006924	vig-1	55568.4	vig-1 encodes a predicted RNA-binding protein orthologous to Drosophila VIG (Vasa Intronic Gene)\; vig-1 activity is required for proper function of the let-7 miRNA in vivo and thus, for regulating the transition from late larval to adult cell fates\; VIG-1 is a component of the 250 kDa RNA-induced silencing complex (RISC) complex and co-immunoprecipates with both TSN-1, the C. elegans Tudor-SN o…	Predicted to enable RNA binding activity. Part of RISC complex. Expressed in neurons. Is an ortholog of human HABP4 (hyaluronan binding protein 4) and SERBP1 (SERPINE1 mRNA binding protein 1).
WBGene00010419	atp-1	53773	H28O16.1 encodes the C. elegans ortholog of the alpha subunit of mitochondrial ATP synthase.	Enables enterobactin binding activity. Involved in iron import into cell. Located in mitochondrion. Expressed in tail. Human ortholog(s) of this gene implicated in combined oxidative phosphorylation deficiency 22\; mitochondrial complex V (ATP synthase) deficiency nuclear type 4 (multiple)\; and vascular dementia. Is an ortholog of human ATP5F1A (ATP synthase F1 subunit alpha).
WBGene00004418	rpl-7	52650.9	rpl-7 encodes a large ribosomal subunit L7 protein required in mass RNAi assays for embryonic viability and normally rapid growth.	Predicted to enable RNA binding activity. Predicted to be a structural constituent of ribosome. Predicted to be involved in maturation of LSU-rRNA from tricistronic rRNA transcript (SSU-rRNA, 5.8S rRNA, LSU-rRNA). Predicted to be located in ribosome. Predicted to be part of cytosolic large ribosomal subunit. Expressed in somatic cell. Is an ortholog of human RPL7 (ribosomal protein L7).
WBGene00004415	rpl-4	52027.6	rpl-4 encodes a large ribosomal subunit L4 protein.	Predicted to enable RNA binding activity. Predicted to be a structural constituent of ribosome. Involved in determination of adult lifespan. Predicted to be located in ribosome. Predicted to be part of cytosolic large ribosomal subunit. Is an ortholog of human RPL4 (ribosomal protein L4).
WBGene00017671	pgal-1	52014.2	N.A.	Predicted to enable metal ion binding activity and peptidylamidoglycolate lyase activity. Predicted to be involved in peptide metabolic process. Predicted to be located in extracellular region. Expressed in head ganglion\; nervous system\; and tail ganglion. Human ortholog(s) of this gene implicated in prostate adenocarcinoma. Is an ortholog of human PAM (peptidylglycine alpha-amidating monooxyge…
WBGene00004473	rps-4	51346.8	rps-4 encodes a small ribosomal subunit S4 protein.	Predicted to enable RNA binding activity. Predicted to be a structural constituent of ribosome. Predicted to be involved in translation. Predicted to be located in ribosome. Predicted to be part of cytosolic small ribosomal subunit. Is an ortholog of human RPS4X (ribosomal protein S4 X-linked)\; RPS4Y1 (ribosomal protein S4 Y-linked 1)\; and RPS4Y2 (ribosomal protein S4 Y-linked 2).
WBGene00000829	ctb-1	50526.6	The ctb-1 gene resides on the mitochondrial chromosome, and encodes the cytochrome b protein of mitochondrial complex III\; mutation of ctb-1 suppresses the slow embryonic development of isp-1 mutants, while enhancing their paraquat resistance.	Predicted to enable electron transfer activity\; metal ion binding activity\; and oxidoreductase activity. Predicted to contribute to ubiquinol-cytochrome-c reductase activity. Predicted to be involved in mitochondrial electron transport, ubiquinol to cytochrome c. Predicted to be located in membrane. Predicted to be part of respiratory chain complex III.
WBGene00000698	col-124	49770.9	N.A.	Predicted to be a structural constituent of cuticle. Predicted to be located in membrane. Predicted to be part of collagen trimer.
WBGene00000229	atp-2	48396.5	atp-2 encodes the beta subunit of the soluble, catalytic F1 portion of ATP synthase (mitochondrial respiratory chain [MRC] complex V)\; atp-2 activity is required for embryonic and larval development past the L3 stage, as well as for normal mobility, pharyngeal pumping, defecation, growth rate, and larval lifespan\; in males, atp-2 activity is also required cell autonomously in male-specific sens…	Enables protein domain specific binding activity. Involved in several processes, including determination of adult lifespan\; inductive cell migration\; and nematode pharyngeal pumping. Located in mitochondrion and non-motile cilium. Expressed in HOB\; head\; ray neuron type B\; and tail. Is an ortholog of human ATP5F1B (ATP synthase F1 subunit beta).
WBGene00006928	vit-4	48146.3	N.A.	Predicted to enable lipid transporter activity. Predicted to be involved in lipid transport. Predicted to be located in extracellular region.
WBGene00004924	snt-4	48046.7	N.A.	Predicted to enable SNARE binding activity\; calcium ion sensor activity\; and calcium-dependent phospholipid binding activity. Predicted to be involved in calcium-dependent activation of synaptic vesicle fusion\; regulation of calcium ion-dependent exocytosis\; and vesicle fusion. Predicted to be located in several cellular components, including axon\; exocytic vesicle\; and synapse. Expressed i…
WBGene00004470	rps-3A	47735.5	rps-1 encodes a small ribosomal subunit S3A protein.	Predicted to be a structural constituent of ribosome. Predicted to be involved in translation. Predicted to be located in cytosol. Predicted to be part of cytosolic small ribosomal subunit. Is an ortholog of human RPS3A (ribosomal protein S3A).
WBGene00001679	gpb-1	46514.1	gpb-1 encodes a heterotrimeric G protein beta subunit that is required during embryonic development for the proper orientation of the mitotic spindle during early cell divisions and thus affects the orientation of early cell division axes, and is also required for larval viability, negatively regulates locomotion and egg-laying, and may affect germline development and osmotic balance\; expressed …	Predicted to enable signaling receptor complex adaptor activity. Involved in several processes, including establishment of mitotic spindle orientation\; negative regulation of locomotion\; and regulation of egg-laying behavior. Predicted to be located in cytoplasm. Predicted to be part of heterotrimeric G-protein complex. Expressed in several structures, including body wall musculature\; germ lin…
WBGene00019831	R02F2.1	46001.2	N.A.	Predicted to enable cyclin-dependent protein serine\/threonine kinase regulator activity. Predicted to be involved in G1\/S transition of mitotic cell cycle. Predicted to be located in cytoplasm and nucleus. Predicted to be part of cyclin-dependent protein kinase holoenzyme complex. Human ortholog(s) of this gene implicated in several diseases, including Alzheimer's disease\; Human papillomavirus…
WBGene00010967	nduo-5	45040.8	The nduo-5 gene resides on the mitochondrial chromosome, and encodes the protein NADH-ubiquinone oxidoreductase chain 5\; this is the C. elegans homolog of the core MT-ND5 of mitochondrial NADH:ubiquinone oxidoreductase (Complex I).	Predicted to enable NADH dehydrogenase (ubiquinone) activity. Predicted to be involved in electron transport coupled proton transport. Predicted to be located in mitochondrial inner membrane. Predicted to be part of respiratory chain complex I.
WBGene00004413	rpl-8	44834.7	rpl-2 encodes a large ribosomal subunit L8 protein.	Predicted to enable RNA binding activity. Predicted to be a structural constituent of ribosome. Predicted to be involved in cytoplasmic translation. Predicted to be located in cytoplasm and ribosome. Predicted to be part of cytosolic large ribosomal subunit. Is an ortholog of human RPL8 (ribosomal protein L8).
WBGene00000609	col-20	44579.4	col-20 encodes a collagen\; its expression pattern and mutant phenotypes are unknown.	Predicted to be a structural constituent of cuticle. Predicted to be located in membrane. Predicted to be part of collagen trimer.
WBGene00014454	MTCE.7	44341.6	MTCE.7 encodes a mitochondrial 18s ribosomal RNA (rRNA).	Enriched in cholinergic neurons\; dopaminergic neurons\; hermaphrodite somatic gonadal cell\; and pharyngeal neurons based on single-cell RNA-seq and RNA-seq studies. Is affected by several genes including nuo-6\; atfs-1\; and atp-2 based on RNA-seq and microarray studies. Is affected by six chemicals including Alovudine\; stavudine\; and Zidovudine based on RNA-seq studies.
WBGene00001386	far-2	43839.5	far-2 encodes a protein similar to a class of secreted fatty acid and retinol-binding proteins expressed in parasitic nematodes and secreted in the surrounding tissues of the host\; expressed in body wall muscle and vulval cells of adult hermaphrodites, and transcript levels progressively increase during development.	Predicted to enable fatty acid binding activity and retinol binding activity. Predicted to be located in extracellular region. Expressed in body wall musculature\; vulval muscle\; and in male.
WBGene00006727	ubq-1	43458.2	N.A.	Predicted to enable protein tag activity and ubiquitin protein ligase binding activity. Involved in programmed cell death involved in cell development and ubiquitin-dependent protein catabolic process. Predicted to be located in cytoplasm and nucleus. Expressed in body wall musculature. Is an ortholog of human UBC (ubiquitin C).
WBGene00022144	pghm-1	43237.7	N.A.	Predicted to enable copper ion binding activity and peptidylglycine monooxygenase activity. Predicted to be involved in peptide metabolic process. Predicted to be located in extracellular region and membrane. Expressed in head ganglion\; nervous system\; and tail ganglion.
WBGene00004167	pqn-87	42887.5	The protein product of this gene is predicted to contain a glutamine\/asparagine (Q\/N)-rich ('prion') domain, by the algorithm of Michelitsch and Weissman (as of the WS77 release of WormBase, i.e., in wormpep77).	Enriched in AVK\; PDB\; RIS\; and germ line based on proteomic\; RNA-seq\; and single-cell RNA-seq studies. Is affected by several genes including cyc-1\; nuo-6\; and csr-1 based on microarray\; RNA-seq\; tiling array\; and proteomic studies. Is affected by nine chemicals including rotenone\; Tunicamycin\; and Zidovudine based on RNA-seq and microarray studies. Is predicted to encode a protein wi…
WBGene00006876	vab-10	42681.3	vab-10 encodes, by alternative splicing, two spectraplakins (VAB-10A and VAB-10B) that are jointly required for mechanical resilience of the epidermis under strain by the contraction of actin microfilaments mechanically linked to fibrous organelles (FOs)\; VAB-10A\/B are, accordingly, required for elongation during embryonic morphogenesis\; VAB-10A has C-terminal plectin repeats while VAB-10B has…	Predicted to enable actin filament binding activity and structural molecule activity. Involved in epidermis morphogenesis. Located in apical plasma membrane\; basal plasma membrane\; and hemidesmosome. Expressed in several structures, including gonad\; intestinal lumen\; nerve ring\; pharynx\; and vulval cell. Human ortholog(s) of this gene implicated in epidermolysis bullosa simplex\; hereditary…
WBGene00004430	rpl-18	42516	rpl-18 encodes a large ribosomal subunit L18 protein.	Predicted to enable RNA binding activity. Predicted to be a structural constituent of ribosome. Predicted to be involved in translation. Predicted to be located in cytoplasm and ribosome. Predicted to be part of cytosolic large ribosomal subunit. Human ortholog(s) of this gene implicated in Diamond-Blackfan anemia 18. Is an ortholog of human RPL18 (ribosomal protein L18).
WBGene00006529	tba-2	42349.6	tba-2 encodes an alpha-tubulin.	Predicted to enable GTP binding activity. Predicted to be a structural constituent of cytoskeleton. Involved in several processes, including centrosome localization\; establishment of mitotic spindle orientation\; and regulation of cytokinesis. Predicted to be located in cytoplasm and microtubule. Expressed in several structures, including body wall musculature\; intestine\; neurons\; pharynx\; a…
WBGene00011289	R102.2	42297.4	N.A.	Expressed in neurons.
WBGene00004471	rps-2	42263.8	rps-2 encodes a small ribosomal subunit S2 protein.	Predicted to be a structural constituent of ribosome. Predicted to be involved in translation. Predicted to be located in ribosome. Predicted to be part of cytosolic small ribosomal subunit. Is an ortholog of human RPS2 (ribosomal protein S2).
WBGene00004477	rps-8	41962.8	rps-8 encodes a small ribosomal subunit S8 protein\; by homology, RPS-8 is predicted to function in protein biosynthesis\; in C. elegans, RPS-8 activity is required for germline development and the overall health of the animal.	Predicted to be a structural constituent of ribosome. Predicted to be involved in maturation of SSU-rRNA from tricistronic rRNA transcript (SSU-rRNA, 5.8S rRNA, LSU-rRNA). Predicted to be located in cytoplasm\; intracellular membraneless organelle\; and membrane. Predicted to be part of cytosolic small ribosomal subunit and small-subunit processome. Is an ortholog of human RPS8 (ribosomal protein…
WBGene00008920	eef-1G	41315.6	N.A.	Predicted to enable translation elongation factor activity. Predicted to be involved in translational elongation. Predicted to be located in cytoplasm and nucleus. Used to study cardiovascular system disease. Is an ortholog of human EEF1G (eukaryotic translation elongation factor 1 gamma).
WBGene00020317	pdf-1	40867.8	N.A.	Involved in several processes, including locomotory behavior\; parturition\; and positive regulation of protein secretion. Predicted to be located in extracellular region. Expressed in neurons and rectum.
WBGene00004416	rpl-5	40789.2	rpl-5 encodes a large ribosomal subunit L5 protein\; by homology, RPL-5 is predicted to function in protein biosynthesis\; in C. elegans RPL-5 activity is broadly required for embryonic, larval, germline, and vulval development, as well as normal body coloration, morphology, and postembryonic growth rates.	Predicted to enable 5S rRNA binding activity. Predicted to be a structural constituent of ribosome. Predicted to be involved in ribosomal large subunit assembly. Predicted to be located in cytosolic ribosome and nucleus. Predicted to be part of cytosolic large ribosomal subunit. Expressed in hyp7 syncytium\; intestine\; and pharyngeal cell. Human ortholog(s) of this gene implicated in Diamond-Bla…
WBGene00000479	cgh-1	40140.3	cgh-1 encodes a putative DEAD-box RNA helicase, orthologous tobudding yeast Dhh1p, fission yeast Ste13p, Drosophila ME31B, andhuman DDX6 (OMIM:600326)\; CGH-1 inhibits physiological apoptosis inoocytes, keeping it down to a normal level of ~50\% in hermaphroditegonads\; independently of apoptosis, CGH-1 is also required for spermfunction, oocyte fertilization, and early embryonic cytokinesis\; by…	Predicted to enable RNA helicase activity and mRNA binding activity. Involved in several processes, including P-body assembly\; determination of adult lifespan\; and negative regulation of translation. Located in P granule\; P-body\; and cytoplasmic stress granule. Part of ribonucleoprotein complex. Expressed in several structures, including Z2\; Z3\; germ line\; gonad\; and neurons. Is an orthol…
WBGene00018519	F46H5.3	39296.9	N.A.	Predicted to enable kinase activity. Predicted to be involved in phosphocreatine biosynthetic process. Predicted to be located in extracellular space. Is an ortholog of several human genes including CKB (creatine kinase B)\; CKM (creatine kinase, M-type)\; and CKMT1B (creatine kinase, mitochondrial 1B).
WBGene00001449	flp-6	39214.4	N.A.	Predicted to enable receptor ligand activity. Involved in several processes, including determination of adult lifespan\; germ-line stem cell population maintenance\; and response to heat. Predicted to be located in extracellular region. Expressed in several structures, including anal region\; ciliated neurons\; head mesodermal cell\; interneuron\; and nerve ring.
WBGene00004469	rpsa-1	38983	rps-0 encodes a small ribosomal subunit SA protein that appears to function as both a ribosomal component and a laminin receptor\; by homology, RPS-0 is predicted to play roles in protein biosynthesis and cell adhesion\; in C. elegans, RPS-0 activity is required for embryonic and germline development, vulval morphogenesis, and the overall health of the animal.	Predicted to be a structural constituent of ribosome. Predicted to be involved in cytoplasmic translation and ribosomal small subunit assembly. Predicted to be located in cytoplasm and ribosome. Predicted to be part of cytosolic small ribosomal subunit. Expressed in tail. Is an ortholog of human RPSA (ribosomal protein SA).
WBGene00004951	spc-1	38954.5	spc-1 encodes the C. elegans alpha spectrin ortholog\; during development, spc-1 activity is required for body morphogenesis, formation of body wall muscles, locomotion, and larval development.	Predicted to enable actin filament binding activity. Involved in several processes, including embryonic body morphogenesis\; nematode larval development\; and regulation of growth. Predicted to be located in several cellular components, including cell junction\; cortical actin cytoskeleton\; and plasma membrane. Expressed in several structures, including body wall musculature\; hermaphrodite gona…
WBGene00001137	eat-6	38915.3	eat-6 encodes an ortholog of the alpha subunit of a sodium\/potassium ATPase, which in turn affects Na+,K(+)-ATPase activity of membranes by affecting the level of the phosphorylated intermediate of the Na+,K(+)-ATPase\; EAT-6 affects relaxation of the pharyngeal muscles, fertility (and thus affects feeding)\; EAT-6 also affects body length, life span, and ASE, ASI and ASJ axonal outgrowth.	Enables P-type sodium:potassium-exchanging transporter activity. Involved in action potential\; monoatomic ion transport\; and regulation of muscle contraction. Located in membrane. Expressed in several structures, including coelomocyte\; intestine\; neurons\; pharynx\; and vulval muscle. Used to study alcohol use disorder. Human ortholog(s) of this gene implicated in several diseases, including …
WBGene00000680	col-106	38901.6	col-106 encodes a predicted cuticular collagen.	Predicted to be a structural constituent of cuticle. Predicted to be part of collagen trimer.
WBGene00004419	rpl-7A	38741.3	rpl-7A encodes a large ribosomal subunit L7a protein required in mass RNAi assays for fertility, vulval development, and general health\; the rpl-7A transcription unit has one nonsense transcript that is up-regulated in vivo by smg[-] mutations, indicating that rpl-7A is a natural substrate for SMG-mediated nonsense suppresssion\; several other natural mRNA substrates of SMG suppression (e.g., rp…	Enables calmodulin binding activity. Predicted to be involved in maturation of LSU-rRNA. Predicted to be located in ribosome. Predicted to be part of cytosolic large ribosomal subunit. Is an ortholog of human RPL7A (ribosomal protein L7a).
WBGene00000962	dhc-1	38622.7	dhc-1 encodes a cytoplasmic dynein heavy chain homolog required in one-cell embryos for pronuclear migration, centrosome separation, centrosome proximity to the male pronucleus, and mitotic spindle orientation, suggesting that DHC-1 helps position the microtubule organizing center\; DHC-1 genetically interacts with SPD-5, a coiled-coil centrosomal protein.	Predicted to enable dynein intermediate chain binding activity\; dynein light intermediate chain binding activity\; and minus-end-directed microtubule motor activity. Involved in several processes, including neuron remodeling\; organelle localization\; and regulation of cellular localization. Located in several cellular components, including kinetochore\; nuclear envelope\; and spindle pole. Expr…
WBGene00019188	H11E01.3	38175.9	N.A.	Enriched in body wall musculature\; intestine\; neurons\; and pharyngeal muscle cell based on microarray\; RNA-seq\; proteomic\; and single-cell RNA-seq studies. Is affected by several genes including cua-1\; atfs-1\; and mter-4 based on microarray and RNA-seq studies. Is affected by ten chemicals including stavudine\; Zidovudine\; and rifampin based on RNA-seq and microarray studies. Is predicte…
WBGene00004143	pqn-59	37789.6	pqn-59 encodes a protein containing a glutamine\/asparagine (Q\/N)-rich domain and similarity to the vertebrate ubiquitin-associated proteins UBAP2 and UBAP2L\; microarray experiments indicate that pqn-59 is expressed maternally and embryonically and in situ hybridization studies show that pqn-59 mRNA exhibits strong germline expression\; loss of pqn-59 activity via RNAi in a wild-type background…	Predicted to be located in cytoplasm and nucleus. Expressed widely. Is an ortholog of human UBAP2L (ubiquitin associated protein 2 like).
WBGene00020696	pygl-1	37355.9	N.A.	Predicted to enable glycogen phosphorylase activity and pyridoxal phosphate binding activity. Predicted to be involved in glycogen catabolic process. Predicted to be located in cytoplasm. Expressed in germ line. Used to study glycogen storage disease. Human ortholog(s) of this gene implicated in glycogen storage disease V\; glycogen storage disease VI\; and lactic acidosis. Is an ortholog of huma…
WBGene00004475	rps-6	36747.6	rps-6 encodes a small (40S) ribosomal subunit S6 protein\; loss of rps-6 activity in adult animals extends lifespan.	Predicted to be a structural constituent of ribosome. Involved in determination of adult lifespan. Predicted to be located in cytoplasm\; nucleolus\; and ribosome. Predicted to be part of small-subunit processome. Is an ortholog of human RPS6 (ribosomal protein S6).
WBGene00000473	cey-2	36576.7	cey-2 encodes a cold-shock\/Y-box domain-containing protein\; by homology, CEY-2 is predicted to function as either an RNA-binding protein involved in translation or RNA processing, or a DNA-binding protein involved in transcriptional regulation\; cey-2 mRNA is expressed maternally in the early embryo, in a pattern characteristic of class II maternal RNAs, which are initially detected throughout …	Predicted to enable nucleic acid binding activity. Predicted to be involved in regulation of gene expression. Part of ribonucleoprotein complex. Expressed in germ cell\; germ line\; pharynx\; and somatic cell. Used to study Huntington's disease. Is an ortholog of human YBX2 (Y-box binding protein 2).
WBGene00003891	osm-11	36456	osm-11 encodes a protein required for normal osmosensation, osmotic resistance, and defecation rhythm, and for fully normal growth rate\; OSM-11 has no clear orthologs outside of nematodes, but is paralogous to DOS-1, OSM-7, and K02F3.7, has a predicted signal sequence with 12 conserved cysteine residues, and may be secreted\; osm-11 mutants have abnormally high levels of internal glycerol, defec…	Enables Notch binding activity. Involved in several processes, including positive regulation of Notch signaling pathway\; response to osmotic stress\; and vulval development. Located in apical part of cell and extracellular space. Expressed in several structures, including P3.p hermaphrodite\; P4.p hermaphrodite\; P5.p hermaphrodite\; P8.p hermaphrodite\; and hermaphrodite gonad.
WBGene00000757	col-184	36041.2	N.A.	Predicted to be a structural constituent of cuticle. Predicted to be located in membrane. Predicted to be part of collagen trimer.
WBGene00004431	rpl-19	36018.1	rpl-19 encodes a large ribosomal subunit L19 protein.	Predicted to enable RNA binding activity. Predicted to be a structural constituent of ribosome. Involved in determination of adult lifespan. Predicted to be located in ribosome. Predicted to be part of cytosolic large ribosomal subunit. Is an ortholog of human RPL19 (ribosomal protein L19).
WBGene00045095	mrpr-1	35432.5	mrpr-1 encodes the RNA component of the endoribonuclease RNase MRP\; RNAse MRP cleaves mitochondrial RNA in mitochondrial DNA synthesis, nucleolar pre-rRNA in ribosome synthesis, and at least one mRNA (CLB2) involved in cell-cycle regulation\; MRP shares several protein subunits with the endoribonuclease RNAse P, which processes tRNA.	Enriched in NSM\; head mesodermal cell\; and ut4 based on RNA-seq and single-cell RNA-seq studies. Is affected by several genes including etr-1\; mrps-5\; and rpn-10 based on RNA-seq and microarray studies. Is affected by four chemicals including rotenone\; multi-walled carbon nanotube\; and glycine based on RNA-seq and microarray studies. Used to study cartilage-hair hypoplasia.
WBGene00001452	flp-9	35167.6	flp-9 encodes a predicted FMRFamide-like peptide neurotransmitter that inhibits action potentials in the pharyngeal muscle when applied to the pharynx of dissected worms and inhibits movement when injected into A. suum\; expressed at highest levels prior to adulthood.	Enables neuropeptide receptor binding activity. Involved in action potential\; locomotory behavior\; and neuropeptide signaling pathway. Predicted to be located in extracellular region. Expressed in nerve ring.
WBGene00012484	car-1	34887.2	car-1 encodes a putative RNA-binding protein orthologous to buddingyeast Scd6p, fission yeast Sum2p, Drosophila TRAL, and human LSM14A andLSM14B\; CAR-1 inhibits physiological apoptosis in oocytes, keeping itdown to a normal level of ~50\% in hermaphrodite gonads\; independently ofapoptosis, CAR-1 is also required for normal oogenesis, early embryoniccytokinesis, and normally organized endoplasmi…	Enables RNA polymerase II core promoter sequence-specific DNA binding activity. Involved in positive regulation of gene expression. Located in endoplasmic reticulum and intracellular membraneless organelle. Part of ribonucleoprotein complex. Expressed in germ line\; gonad\; neurons\; somatic cell\; and touch receptor neurons. Is an ortholog of human LSM14B (LSM family member 14B).
WBGene00004424	rpl-12	34740.4	rpl-12 encodes a large ribosomal subunit L12 protein required in mass RNAi assays for embryonic viability, fertility, normally rapid growth, and general health\; the rpl-12 transcription unit has a nonsense transcript that is up-regulated in vivo by smg[-] mutations, indicating that rpl-12 is a natural substrate for SMG-mediated nonsense suppresssion\; several other natural mRNA substrates of SMG…	Predicted to enable large ribosomal subunit rRNA binding activity. Predicted to be a structural constituent of ribosome. Involved in regulation of alternative mRNA splicing, via spliceosome. Predicted to be located in ribosome. Predicted to be part of cytosolic large ribosomal subunit. Expressed in intestine. Human ortholog(s) of this gene implicated in systemic lupus erythematosus. Is an ortholo…
WBGene00000802	crt-1	34576.2	crt-1 encodes an ortholog of calreticulin (a calcium-binding molecularchaperone of the endoplasmic reticulum)\; crt-1 is dispensable forviability, but required for normal sperm development, male matingefficiency, some forms of necrotic cell death, and hermaphrodite fertilityat high temperatures (which may reflect a stress response)\; crt-1expression is induced by stress\; CRT-1 protein binds Ca(2…	Enables calcium ion binding activity. Involved in several processes, including determination of adult lifespan\; hemidesmosome assembly\; and response to stress. Located in cytoplasm. Expressed in several structures, including coelomocyte\; excretory system\; intestine\; pharynx\; and sperm. Used to study Parkinson's disease. Human ortholog(s) of this gene implicated in several diseases, includin…
WBGene00000552	cmd-1	34375.3	cmd-1 encodes a putative homolog of calmodulin 1 that affects growth rate and fertility.	Predicted to enable calcium ion binding activity and enzyme regulator activity. Involved in several processes, including apoptotic cell clearance\; establishment of meiotic spindle orientation\; and positive chemotaxis. Located in cell periphery\; microtubule cytoskeleton\; and nuclear membrane. Human ortholog(s) of this gene implicated in Alzheimer's disease\; catecholaminergic polymorphic ventr…
WBGene00019510	nucl-1	34206.5	N.A.	Predicted to enable RNA binding activity. Predicted to be located in nucleolus.
WBGene00004478	rps-9	34029.8	rps-9 encodes a small ribosomal subunit S9 protein.	Predicted to enable rRNA binding activity. Predicted to be a structural constituent of ribosome. Predicted to be involved in ribosomal small subunit biogenesis. Predicted to be located in cytoplasm\; nucleolus\; and ribosome. Predicted to be part of cytosolic small ribosomal subunit and small-subunit processome. Is an ortholog of human RPS9 (ribosomal protein S9).
WBGene00004436	rpl-24	33867.5	rpl-24.1 encodes a large ribosomal subunit L24 protein.	Predicted to enable mRNA binding activity. Predicted to be a structural constituent of ribosome. Predicted to be involved in cytoplasmic translation. Predicted to be located in ribosome. Predicted to be part of cytosolic large ribosomal subunit. Is an ortholog of human RPL24 (ribosomal protein L24).
WBGene00004425	rpl-13	33837.5	rpl-13 encodes a large ribosomal subunit L13 protein.	Predicted to enable RNA binding activity. Predicted to be a structural constituent of ribosome. Predicted to be involved in translation. Predicted to be located in cytosol. Predicted to be part of cytosolic large ribosomal subunit. Is an ortholog of human RPL13 (ribosomal protein L13).
WBGene00004476	rps-7	33641.2	rps-7 encodes a small ribosomal subunit S7 protein.	Predicted to be a structural constituent of ribosome. Predicted to be involved in rRNA processing and ribosomal small subunit biogenesis. Predicted to be located in ribosome. Predicted to be part of cytosolic small ribosomal subunit and small-subunit processome. Human ortholog(s) of this gene implicated in Diamond-Blackfan anemia 8. Is an ortholog of human RPS7 (ribosomal protein S7).
WBGene00007463	vgln-1	33443.4	N.A.	Predicted to enable mRNA binding activity. Is an ortholog of human HDLBP (high density lipoprotein binding protein).
WBGene00003756	nlp-18	33341.7	nlp-18 encodes four predicted neuropeptide-like proteins\; in C. elegans, nlp-18 is part of the FAFA neuropeptide family that also contains nlp-20\; nlp-18 is expressed in a variety of neurons, including ASI, NSM, four head neurons, two tail neurons, and two anterior pharyngeal neurons\; nlp-18 expression is also detected in the spermatheca, the rectal gland, and the intestine\; as loss of nlp-18…	Predicted to be involved in neuropeptide signaling pathway. Expressed in intestine\; neurons\; rectal gland cell\; and spermatheca.
WBGene00009119	ndk-1	33178.9	N.A.	Enables identical protein binding activity and protein histidine kinase activity. Involved in several processes, including positive regulation of MAPK cascade\; positive regulation of vulval development\; and regulation of cellular component organization. Expressed in head. Human ortholog(s) of this gene implicated in several diseases, including carcinoma (multiple)\; prostatic hypertrophy\; and …
WBGene00022336	Y82E9BR.3	33135.9	N.A.	Predicted to enable lipid binding activity and proton transmembrane transporter activity. Predicted to be involved in proton motive force-driven ATP synthesis. Predicted to be located in mitochondrial membrane. Predicted to be part of proton-transporting ATP synthase complex, coupling factor F(o). Expressed in hypodermis and pharyngeal muscle cell. Human ortholog(s) of this gene implicated in cle…
WBGene00018468	cla-1	33097.4	F45E4.3 encodes a protein containing C-terminal PDZ and C2 Ca2+-binding domains that is related to the mammalian active zone protein Piccolo\/Aczonin\; loss of F45E4.3 activity has been reported to result in uncoordinated locomotion, suggesting that F45E4.3 plays a role in the organization and\/or function of the neuromuscular system.	Predicted to enable SNARE binding activity\; calcium ion sensor activity\; and calcium-dependent phospholipid binding activity. Involved in maintenance of presynaptic active zone structure\; spontaneous synaptic transmission\; and synaptic vesicle cycle. Located in presynaptic active zone. Expressed in nervous system. Human ortholog(s) of this gene implicated in pontocerebellar hypoplasia type 3.…
WBGene00004433	rpl-21	33041	rpl-21 encodes a large ribosomal subunit L21 protein\; by homology, RPL-21 is predicted to function in protein biosynthesis\; in C. elegans, RPL-21 activity is required for embryonic and germline development.	Predicted to be a structural constituent of ribosome. Predicted to be involved in translation. Predicted to be located in ribosome. Predicted to be part of cytosolic large ribosomal subunit. Human ortholog(s) of this gene implicated in hypotrichosis 12. Is an ortholog of human RPL21 (ribosomal protein L21).
WBGene00016636	perm-2	33017.5	PERM-2 is a secreted protein that localizes to the surface of unfertilized oocytes and the embryonic eggshell\; genetic and co-IP studies show that PERM-2 interacts with PERM-4 and CBD-1 to form a protein complex required for structural integrity of the vitelline layer of the eggshell.	Expressed in oocyte.
WBGene00001169	eef-1A.2	32934.7	eef-1A.2 encodes a translation elongation factor 1-alpha homolog that is required for embryonic viability, fertility, and a normal postembryonic growth rate\; eef-1A.2 encodes at least one alternatively spliced coding sequence identical to that of eef-1A.1.	Predicted to enable GTP binding activity\; GTPase activity\; and translation elongation factor activity. Predicted to be involved in translational elongation. Human ortholog(s) of this gene implicated in Alzheimer's disease\; autosomal dominant intellectual developmental disorder 38\; developmental and epileptic encephalopathy 33\; and ovarian cancer. Is an ortholog of human EEF1A1 (eukaryotic tr…
WBGene00010965	ctc-2	32917.2	The ctc-2 gene resides on the mitochondrial chromosome, and encodes the protein cytochrome c oxidase subunit 2\; cytochrome c oxidase is the component of the respiratory chain that catalyzes the reduction of oxygen to water\; CTC-2 is one of the 3 subunits (1-3) that forms the functional core of the enzyme complex.	Predicted to enable copper ion binding activity. Predicted to contribute to cytochrome-c oxidase activity. Predicted to be involved in ATP synthesis coupled electron transport. Predicted to be located in mitochondrial inner membrane.
WBGene00002265	lec-2	32852.1	lec-2 encodes a 'tandem repeat' type galectin (beta-galactosyl-binding lectin) containing two, tandemly arranged carbohydrate recognition domains\; by homology, LEC-2 may play roles in cell adhesion and aggregation, proliferation, or programmed cell death.	Predicted to enable carbohydrate binding activity and galactoside binding activity. Located in membrane raft and plasma membrane.
WBGene00010556	rack-1	32840.8	rack-1 encodes a seven-WD repeat-containing protein that is the C. elegans ortholog of vertebrate Receptor for Activated C Kinase (Rack1)\; rack-1 is required cell autonomously for VD\/DD motor axon pathfinding\; rack-1 is also required for gonadal distal tip cell migration and for normal brood sizes\; genetic analyses indicate that rack-1 functions in the same pathway with ced-10\/Rac and unc-11…	Predicted to enable protein kinase C binding activity and ribosome binding activity. Involved in several processes, including antifungal innate immune response\; cytoskeleton-dependent cytokinesis\; and motor neuron axon guidance. Located in several cellular components, including centrosome\; growth cone\; and kinetochore. Expressed in anterior distal tip cell\; neurons\; and posterior distal tip…
WBGene00004432	rpl-18A	32572.2	rpl-20 encodes a large ribosomal subunit L18a protein.	Predicted to be a structural constituent of ribosome. Predicted to be involved in cytoplasmic translation. Predicted to be located in ribosome. Predicted to be part of cytosolic large ribosomal subunit. Is an ortholog of human RPL18A (ribosomal protein L18a).
WBGene00004472	rps-3	32519	rps-3 encodes a small ribosomal subunit S3 protein that contains a KH RNA-binding domain and by homology,is predicted to function in protein biosynthesis\; in C. elegans, RPS-3 activity is required for embryonic and germline development, as well as the overall health of the animal.	Predicted to be a structural constituent of ribosome. Predicted to be involved in positive regulation of apoptotic signaling pathway. Predicted to be located in nucleus. Predicted to be part of cytosolic small ribosomal subunit. Is an ortholog of human RPS3 (ribosomal protein S3).
WBGene00019322	ahcy-1	31361.5	ahcy-1 encodes the C. elegans S-adenosylhomocysteine hydrolase (SAHH) ortholog\; by homology, AHCY-1 is predicted to catalyze the hydrolysis of S-adenosyl-L-homocysteine to adenosine and L-homocysteine\; loss of ahcy-1 activity via RNAi results in embryonic and larval lethality, abnormal body morphology, sick animals, and uncoordinated locomotion\; Northern blot analyses indicate the ahcy-1 mRNA …	Predicted to enable adenosylhomocysteinase activity. Predicted to be involved in S-adenosylhomocysteine catabolic process and S-adenosylmethionine cycle. Predicted to be located in cytosol. Expressed in head. Human ortholog(s) of this gene implicated in abdominal aortic aneurysm and hypermethioninemia with deficiency of S-adenosylhomocysteine hydrolase. Is an ortholog of human AHCY (adenosylhomoc…
WBGene00006528	tba-1	31341.5	tba-1 encodes one of nine C. elegans alpha-tubulins\; in early embryos, tba-1 is required, partially redundantly with the closely related tba-2, for a number of microtubule-dependent processes and hence, for normal embryonic development\; wild-type tba-1 activity is also required for cell migrations as well as motor neuron synapse and axon development\; tba-1 is transcribed during oogenesis and w…	Predicted to enable GTP binding activity. Predicted to be a structural constituent of cytoskeleton. Involved in embryo development\; establishment of mitotic spindle orientation\; and regulation of cytokinesis. Located in axon\; somatodendritic compartment\; and spindle. Expressed in several structures, including ganglia\; germ line\; intestine\; neurons\; and somatic nervous system. Is an orthol…
WBGene00003777	nmy-2	31243.2	nmy-2 encodes a non-muscle myosin II\; NMY-2 is required for polarized cytoplasmic flow, polarized distribution of the PAR proteins, cytokinesis, and for proper anterior-posterior polarity in early embryos\; NMY-2 functions with PAR-5 in the onset of the establishment phase of polarization in the C. elegans zygote along the anterior-posterior axis, and nmy-2 is partially redundant with nmy-1 with…	Enables calmodulin binding activity and protein kinase binding activity. Involved in several processes, including asymmetric protein localization involved in cell fate determination\; cell division\; and regulation of anatomical structure morphogenesis. Located in several cellular components, including cleavage furrow\; contractile ring\; and mitotic spindle. Expressed in several structures, incl…
WBGene00015354	snet-1	31134.8	N.A.	Involved in regulation of chemotaxis\; regulation of olfactory learning\; and response to pheromone. Predicted to be located in extracellular region and perikaryon. Expressed in coelomocyte and ganglia.
WBGene00016977	akap-1	30651.4	N.A.	Predicted to enable RNA binding activity. Predicted to be located in membrane and mitochondrion. Expressed in several structures, including gonad and neurons. Is an ortholog of human AKAP1 (A-kinase anchoring protein 1).
WBGene00004417	rpl-6	30642.6	rpl-6 encodes a large ribosomal subunit L6 protein.	Predicted to enable RNA binding activity. Predicted to be a structural constituent of ribosome. Involved in determination of adult lifespan. Predicted to be located in cytosol\; ribosome\; and rough endoplasmic reticulum. Predicted to be part of cytosolic large ribosomal subunit. Is an ortholog of human RPL6 (ribosomal protein L6).
WBGene00004798	sip-1	30042.4	sip-1 encodes a member of the small heat shock family of proteins\; loss of sip-1 function via antisense or large-scale RNAi experiments results in embryonic lethality and in a small but reproducible reduction in lifespan in otherwise long-lived animals, respectively, suggesting that sip-1 plays a role in embryonic development as well as regulation of adult lifespan\; in addition, expression of s…	Predicted to enable unfolded protein binding activity. Involved in determination of adult lifespan\; embryo development\; and response to heat. Located in cytosol. Expressed in body wall musculature and gonad.
WBGene00016534	C39D10.7	29990.3	C39D10.7 encodes a large (1185-residue) protein with 11 chitin-bindingperitrophin-A domains\; C39D10.7 transcripts are enriched inhermaphrodites\; like CEJ-1 and CPG-2, C39D10.7 might participate ineggshell synthesis and early embryonic development, and C39D10.7'smultiple peritrophin-A domains might enable mechanical cross-linking ofchitin\; however, C39D10.7 alone has no visible function in mass…	Predicted to enable chitin binding activity. Predicted to be located in extracellular region. Expressed in germ line.
WBGene00001933	his-59	29971.3	his-59 encodes an H3 histone\; by homology, HIS-59 is predicted to function as a nucleosome component required for packaging of DNA into chromatin\; his-59 is a replication-dependent histone locus that resides in a histone gene-rich region on chromosome IV.	Predicted to enable DNA binding activity and protein heterodimerization activity. Predicted to be a structural constituent of chromatin. Predicted to be part of nucleosome. Is an ortholog of several human genes including H3C1 (H3 clustered histone 1)\; H3C3 (H3 clustered histone 3)\; and H3C4 (H3 clustered histone 4).
WBGene00004428	rpl-13A	29813.3	rpl-16 encodes a large ribosomal subunit L13a protein.	Predicted to enable mRNA binding activity. Predicted to be a structural constituent of ribosome. Predicted to be involved in negative regulation of translation. Predicted to be located in ribosome. Predicted to be part of cytosolic large ribosomal subunit. Is an ortholog of human RPL13A (ribosomal protein L13a).
WBGene00001488	frm-1	29739.4	N.A.	Predicted to enable actin binding activity and structural molecule activity. Predicted to be involved in actomyosin structure organization. Located in plasma membrane. Expressed in several structures, including intestine and pharynx. Human ortholog(s) of this gene implicated in autosomal dominant intellectual developmental disorder 11\; esophagus squamous cell carcinoma\; and meningioma. Is an or…
WBGene00004474	rps-5	29738.9	rps-5 encodes a small ribosomal subunit S5 protein.	Predicted to enable mRNA binding activity and rRNA binding activity. Predicted to be a structural constituent of ribosome. Predicted to be involved in ribosomal small subunit assembly and translation. Predicted to be located in ribosome. Predicted to be part of cytosolic small ribosomal subunit and small-subunit processome. Is an ortholog of human RPS5 (ribosomal protein S5).
WBGene00004427	rpl-15	29564.3	rpl-15 encodes a large ribosomal subunit L15 protein.	Predicted to enable RNA binding activity. Predicted to be a structural constituent of ribosome. Predicted to be involved in cytoplasmic translation. Predicted to be located in cytosolic ribosome. Predicted to be part of cytosolic large ribosomal subunit. Human ortholog(s) of this gene implicated in Diamond-Blackfan anemia 12. Is an ortholog of human RPL15 (ribosomal protein L15).
WBGene00000472	cey-1	29495.5	cey-1 encodes a protein with a cold-shock\/Y-box domain that is expressed in early embryonic blastomeres (at the 15-cell stage, i.e., pre-gastrulation), but is normally repressed in early germline blastomeres by PIE-1.	Predicted to enable nucleic acid binding activity. Predicted to be involved in regulation of gene expression. Located in endoplasmic reticulum. Expressed in germ cell\; germ line\; pharynx\; and somatic cell. Is an ortholog of human YBX3 (Y-box binding protein 3).
WBGene00016405	hecd-1	29492.1	N.A.	Predicted to enable ubiquitin protein ligase activity. Involved in several processes, including hemidesmosome assembly\; positive regulation of proteasomal ubiquitin-dependent protein catabolic process\; and regulation of Notch signaling pathway. Predicted to be located in nuclear speck. Is an ortholog of human HECTD1 (HECT domain E3 ubiquitin protein ligase 1).
WBGene00004412	rpl-10a	29491.8	rpl-1 encodes a large ribosomal subunit L10a protein\; by homology, RPL-1 is predicted to function in protein biosynthesis\; in C. elegans, RPL-1 activity is essential for embryonic development.	Predicted to enable RNA binding activity. Predicted to be involved in translation. Predicted to be located in ribosome. Predicted to be part of cytosolic large ribosomal subunit. Is an ortholog of human RPL10A (ribosomal protein L10a).
WBGene00045238	rpr-1	29432.1	N.A.	Enriched in anterior distal tip cell\; germ line\; head mesodermal cell\; and ut4 based on single-cell RNA-seq studies. Is affected by several genes including mxl-2\; nuo-6\; and atfs-1 based on microarray and RNA-seq studies. Is affected by seven chemicals including Tunicamycin\; paraquat\; and Ketamine based on microarray and RNA-seq studies.
WBGene00008505	F01G4.6	29417.8	N.A.	Predicted to enable phosphate transmembrane transporter activity. Predicted to be involved in phosphate ion transmembrane transport. Predicted to be located in mitochondrial inner membrane. Is an ortholog of human SLC25A3 (solute carrier family 25 member 3).
WBGene00000273	brp-1	29349.2	brp-1 encodes a glutamine-rich protein that is conserved in nematodes, but that has no known homologies or sequence motifs\; BRP-1 is able to bypass the need for the S. cerevisiae mating pheromone MAP kinase cascade to activate the mating pheromone-responsive gene FUSl.	Predicted to be located in membrane.
WBGene00004421	rpl-10L	29182.7	rpl-10 encodes a large ribosomal subunit L10 protein required in mass RNAi assays for embryonic viability, fertility, normally rapid growth, and normal body coloration\; the rpl-10 transcription unit has a nonsense transcript that is up-regulated in vivo by smg[-] mutations, indicating that rpl-10 is a natural substrate for SMG-mediated nonsense suppresssion\; several other natural mRNA substrate…	Predicted to be a structural constituent of ribosome. Predicted to be involved in translation. Predicted to be located in ribosome. Predicted to be part of cytosolic large ribosomal subunit. Expressed in head\; pharyngeal muscle cell\; and tail. Human ortholog(s) of this gene implicated in autistic disorder\; spermatogenic failure 63\; and syndromic X-linked mental retardation 35. Is an ortholog …
WBGene00004488	rps-19	28954	rps-19 encodes a small ribosomal subunit S19 protein, orthologous to human RPS19 (OMIM:603474, mutated in Diamond-Blackfan anemia).	Predicted to enable RNA binding activity. Predicted to be a structural constituent of ribosome. Predicted to be involved in ribosomal small subunit assembly. Predicted to be located in ribosome. Predicted to be part of cytosolic small ribosomal subunit. Human ortholog(s) of this gene implicated in Diamond-Blackfan anemia 1. Is an ortholog of human RPS19 (ribosomal protein S19).
WBGene00014294	C53C7.5	28502.2	N.A.	Enriched in Psub1\; anchor cell\; neurons\; somatic gonad precursor\; and ventral nerve cord based on tiling array\; RNA-seq\; single-cell RNA-seq\; and microarray studies. Is affected by several genes including nuo-6\; cua-1\; and etr-1 based on RNA-seq and microarray studies. Is affected by ten chemicals including rotenone\; D-glucose\; and Psoralens based on RNA-seq and microarray studies.
WBGene00000751	col-178	28416	N.A.	Predicted to be a structural constituent of cuticle. Predicted to be located in membrane. Predicted to be part of collagen trimer. Expressed widely.
WBGene00000597	col-8	28180.8	col-8 encodes a collagen, individually dispensable for viability and gross morphology, which is specifically expressed in dauers and adults but not in eggs or L4 larvae, like col-7, col-18, and col-19\; the amino- and carboxyl-terminal cysteine-rich regions of COL-8 are most closely related to those of COL-19, COL-35, and COL-39.	Predicted to be a structural constituent of cuticle. Predicted to be part of collagen trimer.
WBGene00016638	perm-4	28009.7	PERM-4 is a secreted protein that localizes to the surface of unfertilized oocytes and the embryonic eggshell\; genetic and co-IP studies show that PERM-4 interacts with PERM-2 and CBD-1 to form a protein complex required for structural integrity of the vitelline layer of the eggshell.	Expressed in oocyte.
WBGene00011629	vps-13A	27608.3	N.A.	Predicted to be involved in protein retention in Golgi apparatus and protein targeting to vacuole. Expressed in vulval muscle. Human ortholog(s) of this gene implicated in Parkinson's disease 23\; choreaacanthocytosis\; and choreatic disease. Is an ortholog of human VPS13A (vacuolar protein sorting 13 homolog A).
WBGene00011867	chc-1	27557.5	chc-1 encodes the C. elegans clathrin heavy chain ortholog\; loss of chc-1 activity via RNAi results in defects in receptor-mediated yolk endocytosis and thus, embryonic lethality.	Predicted to enable clathrin light chain binding activity. Involved in several processes, including apical protein localization\; determination of adult lifespan\; and positive regulation of clathrin-dependent endocytosis. Located in cell periphery\; clathrin-coated endocytic vesicle\; and mitotic spindle. Expressed in coelomocyte\; germ line\; hyp7 syncytium\; hypodermal cell\; and pharyngeal ce…
WBGene00006831	unc-104	27431.5	unc-104 encodes a kinesin-like motor protein homologous to human axonal transporter of synaptic vesicles (ATSV, OMIM: 601255)\; UNC-104 is required for anterograde axonal transport of synaptic vesicles as well as differentiation of pre- and postsynaptic domains at inhibitory neuromuscular junctions\; UNC-104 is expressed solely in neurons\; UNC-104 retrograde movement is regulated by PTL-1\/Tau, …	Enables cytoskeletal protein binding activity\; phosphatidylinositol phosphate binding activity\; and plus-end-directed microtubule motor activity. Involved in several processes, including chemical synaptic transmission\; regulation of cellular component organization\; and regulation of cellular localization. Located in axon\; presynapse\; and somatodendritic compartment. Expressed in epithelial …
WBGene00014095	gdh-1	27412.1	gdh-1 encodes a glutamate dehydrogenase, required in mass RNAi assays for normal fertility and rapid growth, that is expressed in larval and adult pharynx, intestine, and rectal gland cells\; GDH-1 is orthologous to human GLUD1 (OMIM:138130, mutated in hyperinsulinemic hypoglycemia and hyperammonemia) and GLUD2 (OMIM:300144).	Predicted to enable glutamate dehydrogenase (NAD+) activity. Predicted to be involved in glutamate catabolic process. Predicted to be located in mitochondrion. Expressed in head\; intestine\; pharynx\; rectal gland cell\; and tail. Human ortholog(s) of this gene implicated in Alzheimer's disease\; familial hyperinsulinemic hypoglycemia 6\; and hyperinsulinism. Is an ortholog of human GLUD1 (gluta…
WBGene00001502	ftt-2	27224.5	ftt-2 encodes a 14-3-3 protein\; FTT-2 is required for regulating the localization of the product of YAP-1, a Yes-associated protein (Yap) homolog, between the cytoplasm and the nucleus.	Enables DNA-binding transcription factor binding activity. Involved in dauer larval development and negative regulation of protein import into nucleus. Located in cytoplasm and nucleus. Expressed in several structures, including C\; E\; Psub3\; gonad\; and intestine. Human ortholog(s) of this gene implicated in several diseases, including carcinoma (multiple)\; temporal lobe epilepsy\; and urinar…
WBGene00004374	rme-2	27196.3	rme-2 encodes a member of the low-density lipoprotein (LDL) receptor superfamily\; RME-2 functions as the C. elegans yolk receptor whose activity is required for yolk uptake during oogenesis\; RME-2 is expressed in developing oocytes where it localizes at or near the cell surface.	Enables low-density lipoprotein particle receptor activity. Involved in embryo development\; oocyte development\; and ovulation. Located in endosome membrane and plasma membrane. Expressed in germ cell\; germ line\; and gonad. Human ortholog(s) of this gene implicated in several diseases, including Alzheimer's disease\; female reproductive organ cancer (multiple)\; hepatobiliary system cancer (mu…
WBGene00001936	his-62	27160.4	his-62 encodes an H2B histone.	Predicted to enable DNA binding activity and protein heterodimerization activity. Predicted to be a structural constituent of chromatin. Predicted to be part of nucleosome. Is an ortholog of several human genes including H2BC3 (H2B clustered histone 3)\; H2BC5 (H2B clustered histone 5)\; and H2BC8 (H2B clustered histone 8).
WBGene00000920	daf-28	27017.7	daf-28 encodes a beta-type insulin, mostly similar to INS-4 and INS-6and homologous to human insulin\; DAF-28 inhibits dauer formation\; daf-28mutants arrest as dauers and have downregulated signals through theDAF-2\/insulin pathway\; in young animals, daf-28 is expressed in ASI andASJ neurons, which regulate dauer formation\; in older animals, daf-28expression spreads to other head neurons and t…	Predicted to enable insulin receptor binding activity. Involved in several processes, including insulin receptor signaling pathway\; negative regulation of dauer entry\; and regulation of synaptic assembly at neuromuscular junction. Acts upstream of with a negative effect on protein import into nucleus. Located in extracellular space and synapse. Expressed in several structures, including distal …
WBGene00000114	alh-8	26809.4	alh-8 is orthologous to the human gene METHYLMALONATE-SEMIALDEHYDE DEHYDROGENASE (ALDH6A1\; OMIM:603178), which when mutated leads to MMSDH deficiency.	Predicted to enable methylmalonate-semialdehyde dehydrogenase (acylating, NAD) activity. Predicted to be involved in thymine catabolic process and valine catabolic process. Located in mitochondrion. Is an ortholog of human ALDH6A1 (aldehyde dehydrogenase 6 family member A1).
WBGene00000064	act-2	26625.9	act-2 encodes one of five C. elegans actins\; act-2 functions redundantly in early embryonic cortical microfilaments with act-1 and act-3, and dominant mutations in act-2 result in uncoordinated locomotion\; an ACT-2::GFP reporter fusion is expressed in the cytoplasm of embryonic cells and is also found in contractile filaments in adult muscle cells.	Predicted to enable ATP binding activity. Involved in several processes, including cortical actin cytoskeleton organization\; cytoskeleton-dependent cytokinesis\; and embryo development. Located in actin filament and cell cortex. Expressed in body wall musculature\; gonad\; hypodermis\; and neurons. Human ortholog(s) of this gene implicated in several diseases, including Baraitser-Winter syndrome…
WBGene00004429	rpl-17	26356.5	rpl-17 encodes a large ribosomal subunit L17 protein\; by homology, RPL-17 is predicted to function in protein biosynthesis\; in C. elegans, RPL-17 activity is required for embryonic and germline development, as well as normal postembryonic growth rates.	Predicted to be a structural constituent of ribosome. Predicted to be involved in cytoplasmic translation. Predicted to be located in ribosome. Predicted to be part of cytosolic large ribosomal subunit. Is an ortholog of human RPL17 (ribosomal protein L17).
WBGene00008218	nasp-2	26330.2	N.A.	Predicted to enable histone binding activity. Predicted to be involved in CENP-A containing chromatin assembly and DNA replication-dependent chromatin assembly. Predicted to be located in nucleoplasm. Expressed in germ line. Human ortholog(s) of this gene implicated in ovarian cancer. Is an ortholog of human NASP (nuclear autoantigenic sperm protein).
WBGene00003153	mca-3	26118.5	mca-3 encodes one of three C. elegans plasma membrane Ca2+ ATPases (PMCAs)\; by homology, MCA-3 is predicted to function as a molecular pump that couples ATP hydrolysis to extrusion of cytosolic Ca2+\; mca-3 activity is required for coelomoycte endocytosis, normal coordinated locomotion, and embryonic and larval development\; in regulating endocytosis, MCA-3 is required specifically in the early …	Predicted to enable P-type calcium transporter activity. Involved in several processes, including negative regulation of cytosolic calcium ion concentration\; positive regulation of endocytosis\; and positive regulation of growth rate. Located in plasma membrane. Expressed in body wall musculature\; coelomocyte\; intestine\; nervous system\; and touch receptor neurons. Human ortholog(s) of this g…
WBGene00004208	ptc-1	25937.8	ptc-1 encodes an ortholog of Drosophila PATCHED (PTC) and human PTCH which defines one of seven paralogous families of sterol sensing domain (SSD) proteins\; PTC-1 is required for cytokinesis in the germline, but not in somatic cells (the converse of PTR-2's function, and a role conserved in C. briggsae)\; PTC-1 is also required to isolate meiotic germline nuclei from one another so that their nu…	Predicted to enable hedgehog family protein binding activity\; hedgehog receptor activity\; and smoothened binding activity. Involved in molting cycle. Located in plasma membrane. Used to study Parkinson's disease. Human ortholog(s) of this gene implicated in several diseases, including carcinoma (multiple)\; colorectal adenoma\; and holoprosencephaly 7. Is an ortholog of human PTCH1 (patched 1) …
WBGene00023068	rpl-41.2	25393.5	N.A.	Predicted to be a structural constituent of ribosome. Predicted to be involved in translation. Predicted to be located in ribosome.
WBGene00011884	enol-1	25109.4	enol-1 is orthologous to human ENOLASE 1 (also CRYSTALLIN, TAU\; ENO1\; OMIM:172430), which when mutated leads to spherocytic red cell enolase deficiency.	Predicted to enable phosphopyruvate hydratase activity. Predicted to be involved in glycolytic process. Predicted to be located in cytoplasm. Predicted to be part of phosphopyruvate hydratase complex. Expressed in head. Human ortholog(s) of this gene implicated in several diseases, including Alzheimer's disease\; migraine without aura\; neuroendocrine carcinoma\; and prostate cancer. Is an orthol…
WBGene00007053	chd-7	25072.8	N.A.	Predicted to enable several functions, including ATP hydrolysis activity\; ATP-dependent chromatin remodeler activity\; and histone binding activity. Predicted to be involved in chromatin remodeling and regulation of gene expression. Predicted to be located in chromatin and nucleus. Used to study CHARGE syndrome. Human ortholog(s) of this gene implicated in CHARGE syndrome and hypogonadotropic hy…
WBGene00001938	his-64	24986.1	his-64 encodes an H4 histone.	Predicted to enable DNA binding activity and protein heterodimerization activity. Predicted to be a structural constituent of chromatin. Involved in positive regulation of transcription by RNA polymerase II. Expressed in head\; somatic cell\; and tail. Is an ortholog of several human genes including H4C1 (H4 clustered histone 1)\; H4C4 (H4 clustered histone 4)\; and H4C9 (H4 clustered histone 9).
WBGene00021350	rpl-27A	24870.6	N.A.	Predicted to be a structural constituent of ribosome. Predicted to be located in ribosome. Predicted to be part of cytosolic large ribosomal subunit. Expressed in somatic cell. Is an ortholog of human RPL27A (ribosomal protein L27a).
WBGene00006754	unc-15	24715	The unc-15 gene encodes a paramyosin ortholog\; UNC-15 protein physically interacts with MHC A, one isoform of myosin heavy chain (MHC) in striated muscle\; UNC-15 accumulation is decreased in the absence of UNC-54 (myosin B), implying that degradation of UNC-15 is inhibited by its binding myosin B\; conversely, myosin B (but not MYO-3\/myosin A) fails to accumulate in unc-15 mutants.	Enables SH3 domain binding activity\; cytoskeletal protein binding activity\; and protein kinase binding activity. Involved in several processes, including positive regulation of ovulation\; positive regulation of sarcomere organization\; and skeletal muscle myosin thick filament assembly. Located in A band and myosin filament. Expressed in alimentary muscle\; body wall musculature\; gonad\; vulv…
WBGene00010260	ddx-17	24473.1	N.A.	Predicted to enable RNA helicase activity and mRNA binding activity. Involved in pre-miRNA processing. Predicted to be located in cytoplasm and nucleus. Predicted to be part of ribonucleoprotein complex. Expressed in PVDL\; PVDR\; and neurons. Human ortholog(s) of this gene implicated in skin squamous cell carcinoma. Is an ortholog of human DDX17 (DEAD-box helicase 17).
WBGene00000656	col-80	24447.5	N.A.	Predicted to be a structural constituent of cuticle. Predicted to be part of collagen trimer. Human ortholog(s) of this gene implicated in cocaine dependence. Is an ortholog of human COL21A1 (collagen type XXI alpha 1 chain).
WBGene00007624	hrde-1	24422.6	N.A.	Predicted to enable RNA endonuclease activity\; miRNA binding activity\; and single-stranded RNA binding activity. Involved in germ cell development and regulatory ncRNA-mediated post-transcriptional gene silencing. Located in nucleus. Part of RNAi effector complex. Expressed in germ cell\; germ line\; and in male.
WBGene00003920	par-5	24340.7	PAR-5 encodes one of two C. elegans 14-3-3 proteins\; par-5 is essential for early embryonic development, particularly for early embryonic asymmetry\; PAR-5 also functions in a Wnt\/MAPK signaling pathway to regulate the nuclear level of the POP-1\/TCF transcription factor\; PAR-5 has been shown to physically interact with a number of proteins, including those involved in G protein signaling path…	Involved in several processes, including cell fate commitment\; determination of adult lifespan\; and establishment of localization in cell. Located in cell cortex and nucleus. Expressed in head neurons. Human ortholog(s) of this gene implicated in several diseases, including carcinoma (multiple)\; temporal lobe epilepsy\; and urinary bladder cancer. Is an ortholog of human YWHAB (tyrosine 3-mono…
WBGene00004481	rps-12	24174.9	rps-12 encodes a small ribosomal subunit S12 protein\; by homology, RPS-12 is predicted to function in protein biosynthesis\; in C. elegans, RPS-12 activity is required for embryonic and germline development, normal movement, and the overall health of the animal.	Predicted to be a structural constituent of ribosome. Predicted to be involved in maintenance of translational fidelity and ribosomal small subunit biogenesis. Predicted to be located in nucleolus and ribosome. Predicted to be part of cytosolic small ribosomal subunit and small-subunit processome. Is an ortholog of human RPS12 (ribosomal protein S12).
WBGene00010785	top-2	23845.8	N.A.	Predicted to enable DNA binding activity\; DNA negative supercoiling activity\; and small molecule binding activity. Involved in mitotic sister chromatid separation. Predicted to be located in nucleus. Expressed in embryonic cell\; germ cell\; and somatic cell. Human ortholog(s) of this gene implicated in several diseases, including cervix uteri carcinoma in situ\; penile benign neoplasm\; and ur…
WBGene00007027	ssl-1	23750.8	The protein product of this gene is predicted to contain a glutamine\/asparagine (Q\/N)-rich ('prion') domain, by the algorithm of Michelitsch and Weissman (as of the WS77 release of WormBase, i.e., in wormpep77)	Predicted to enable ATP hydrolysis activity and histone binding activity. Involved in negative regulation of cell fate specification. Predicted to be located in nucleus. Predicted to be part of Swr1 complex. Human ortholog(s) of this gene implicated in Floating-Harbor syndrome. Is an ortholog of human SRCAP (Snf2 related CREBBP activator protein).
WBGene00020097	larp-1	23643.6	larp-1 encodes an La-related protein containing an La RNA-binding motif and a conserved LARP1 domain\; loss of larp-1 activity results in defective oogenesis, which is suppressed by loss of function mutations in Ras-MAPK signaling components, suggesting that in the germline, LARP-1 functions to negatively regulate Ras-MAPK pathway activity\; as LARP-1 binds RNA homopolymers in vitro and larp-1 mu…	Enables poly(G) binding activity and poly(U) RNA binding activity. Predicted to be involved in positive regulation of translation. Located in P-body. Expressed in germ line\; head\; and tail. Is an ortholog of human LARP1 (La ribonucleoprotein 1, translational regulator) and LARP1B (La ribonucleoprotein 1B).
WBGene00022048	fln-1	23560.5	fln-1 encodes three protein isoforms, a full length filamin (fln-1a) orthologous to human filamin A, alpha (FLNA\; OMIM:300017), of 2257 amino acids containing a well conserved N-terminal ABD and 20 Ig-like repeats and two trans-sliced versions with C- and N- terminal truncations are 1084 and 836 amino-acids respectively\; expression of full-length filamin in hermaphrodites is required for normal…	Predicted to enable actin filament binding activity. Involved in several processes, including axon development\; semaphorin-plexin signaling pathway\; and uterus morphogenesis. Located in actin filament. Expressed in body wall musculature\; gonad\; hypodermis\; intestine\; and vulval muscle. Human ortholog(s) of this gene implicated in several diseases, including Larsen syndrome\; bone developmen…
WBGene00004736	sca-1	23457.3	The sca-1 gene encodes a sarco-endoplasmic reticulum Ca[2+] ATPase homolog that is required for development and muscle function\; sca-1 is also a ortholog of human ATP2A1 (OMIM:108730), which when mutated leads to Darier-White disease (OMIM:124200).	Enables P-type calcium transporter activity and chromatin DNA binding activity. Involved in several processes, including chemical homeostasis\; determination of adult lifespan\; and response to stress. Located in cytoplasmic vesicle and endomembrane system. Expressed in several structures, including egg-laying apparatus\; excretory system\; intestine\; non-striated muscle\; and spermatheca. Human…
WBGene00002077	imb-3	23391.3	imb-3 encodes an importin-beta-like protein orthologous to Drosophila, vertebrate, and yeast importin\/karyopherin-beta3\; IMB-3 is predicted to function as a nuclear transport factor that, with the RAN-1 GTPase, regulates nuclear import of ribosomal proteins\; in C. elegans, IMB-3 is essential for embryogenesis and germline development, and may also be required for normal postembryonic growth ra…	Predicted to enable nuclear import signal receptor activity and nuclear localization sequence binding activity. Predicted to be involved in protein import into nucleus. Predicted to be located in cytoplasm and nucleus. Is an ortholog of human IPO5 (importin 5) and RANBP6 (RAN binding protein 6).
WBGene00008707	epic-1	23373	N.A.	Enriched in several structures, including GLR\; epithelial cell\; germ line\; hypodermis\; and rectal gland cell based on tiling array\; RNA-seq\; single-cell RNA-seq\; and microarray studies. Is affected by several genes including cyc-1\; nuo-6\; and numr-2 based on microarray\; tiling array\; and RNA-seq studies. Is affected by twenty-eight chemicals including diallyl trisulfide\; nicotinic aci…
WBGene00010262	droe-4	23230	N.A.	Enriched in anchor cell\; excretory cell\; muscle cell\; and neurons based on RNA-seq\; single-cell RNA-seq\; and microarray studies. Is affected by several genes including nuo-6\; numr-2\; and numr-1 based on microarray and RNA-seq studies. Is affected by fifteen chemicals including rotenone\; Neurotoxins\; and metformin based on RNA-seq and microarray studies. Is predicted to encode a protein w…
WBGene00022748	oaz-1	23105.5	N.A.	Predicted to enable ornithine decarboxylase inhibitor activity. Predicted to be involved in positive regulation of protein catabolic process. Predicted to be located in cytoplasm and nucleus. Expressed in spermathecal-uterine valve cell. Human ortholog(s) of this gene implicated in coronary restenosis. Is an ortholog of human OAZ1 (ornithine decarboxylase antizyme 1).
WBGene00009460	ubr-5	23103.6	F36A2.13 encodes an E3 ubiquitin ligase similar to the mammalian UBR5 ubiquitin ligases\; F36A2.13 is predicted to function in ubiquitin-dependent protein catabolic processes.	Predicted to enable ubiquitin-ubiquitin ligase activity. Predicted to be involved in positive regulation of canonical Wnt signaling pathway and protein polyubiquitination. Predicted to be located in cytoplasm and nucleus. Human ortholog(s) of this gene implicated in carcinoma (multiple) and invasive ductal carcinoma. Is an ortholog of human UBR5 (ubiquitin protein ligase E3 component n-recognin 5…
WBGene00014309	F07H5.5	23007.9	N.A.	Enriched in anchor cell\; cholinergic neurons\; dopaminergic neurons\; intestine\; and sensory neurons based on RNA-seq\; single-cell RNA-seq\; and microarray studies. Is affected by several genes including nuo-6\; etr-1\; and isp-1 based on RNA-seq and microarray studies. Is affected by ten chemicals including rotenone\; stavudine\; and Zidovudine based on RNA-seq and microarray studies.
WBGene00002978	lev-11	22981.4	lev-11 encodes tropomyosin, an actin-binding contractile structural protein orthologous to human TROPOMYOSIN 1 (TPM1\; OMIM:191010), which when mutated leads to familial hypertrophic cardiomyopathy\; LEV-11 is required for embryonic development, normal body morphology, and locomotion\; expressed as multiple tissue-specific isoforms generated by alternative mRNA splicing and promoter use, LEV-11 i…	Enables actin filament binding activity. Involved in several processes, including actin filament organization\; regulation of actin polymerization or depolymerization\; and spicule insertion. Located in striated muscle thin filament. Expressed in several structures, including body wall musculature\; germ line\; intestine\; non-striated muscle\; and pharynx. Human ortholog(s) of this gene implicat…
WBGene00007352	cdc-48.1	22890.2	cdc-48.1 encodes a type II AAA ATPase, homologous to yeast Cdc48 and mammalian p97\/VCP, that functions as a ubiquitin-selective chaperone\; cdc-48.1 acts redundantly with cdc-48.2 and in conjunction with ufd-1 and npl-4 in endoplasmic reticulum-associated protein degradation (ERAD)\; in addition, CDC-48.1, UFD-2 and chn-1 function together to regulate myosin assembly and muscle formation via the…	Enables ATP hydrolysis activity and identical protein binding activity. Involved in several processes, including ERAD pathway\; positive regulation of mitotic cell cycle, embryonic\; and positive regulation of proteasomal ubiquitin-dependent protein catabolic process. Located in nucleoplasm and perinuclear region of cytoplasm. Part of VCP-NPL4-UFD1 AAA ATPase complex. Expressed in several structu…
WBGene00006728	ubq-2	22846.8	ubq-2 encodes a bifunctional protein that contains two domains\; an N-terminal ubiquitin peptide, and a C-terminal large ribosomal subunit protein L40 peptide.	Predicted to enable protein tag activity and ubiquitin protein ligase binding activity. Involved in polarity specification of anterior\/posterior axis. Predicted to be located in cytoplasm and nucleus. Predicted to be part of ribonucleoprotein complex. Expressed in several structures, including hermaphrodite gonad\; intestine\; pharyngeal-intestinal valve\; pharynx\; and somatic nervous system. H…
WBGene00002845	let-711	22359.2	let-711 encodes the C. elegans ortholog of NOT1, the conserved core component of the multisubunit CCR4\/NOT complex that plays a role in regulation of gene expression via various processes including transcriptional control, mRNA deadenylation, and protein ubiquitination\; in C. elegans, let-711 activity is essential for embryonic and larval development and in particular, for proper spindle positi…	Predicted to enable molecular adaptor activity. Involved in several processes, including microtubule cytoskeleton organization\; nematode larval development\; and post-transcriptional regulation of gene expression. Located in cytoplasm. Part of CCR4-NOT complex. Expressed in germ line\; gonad\; and in male. Human ortholog(s) of this gene implicated in Vissers-Bodmer syndrome and holoprosencephaly…
WBGene00004479	rps-10	22192.5	rps-10 encodes a small (40S) ribosomal subunit S10 protein\; loss of rps-10 activity in adult animals extends lifespan.	Predicted to enable RNA binding activity. Predicted to be a structural constituent of ribosome. Involved in determination of adult lifespan. Predicted to be located in cytoplasm and ribosome. Predicted to be part of cytosolic small ribosomal subunit. Human ortholog(s) of this gene implicated in Diamond-Blackfan anemia 9. Is an ortholog of human RPS10 (ribosomal protein S10) and RPS10P5 (ribosomal…
WBGene00004480	rps-11	22141.8	rps-11 encodes a small ribosomal subunit S11 protein\; by homology, RPS-11 is predicted to function in protein biosynthesis\; in C. elegans, RPS-11 activity is required for embryonic and germline development, as well as the overall health of the animal\; loss of rps-11 activity in adult animals extends lifespan.	Predicted to be a structural constituent of ribosome. Involved in determination of adult lifespan. Predicted to be located in ribosome. Predicted to be part of cytosolic small ribosomal subunit. Is an ortholog of human RPS11 (ribosomal protein S11).
WBGene00015117	B0294.1	22114.1	N.A.	Enriched in several structures, including AVE\; PVT\; amphid neurons\; anchor cell\; and head mesodermal cell based on tiling array\; RNA-seq\; single-cell RNA-seq\; and microarray studies. Is affected by several genes including cyc-1\; hyl-1\; and nuo-6 based on microarray and RNA-seq studies. Is affected by twelve chemicals including 1-methylnicotinamide\; Psoralens\; and allantoin based on RNA…
WBGene00004449	rpl-35	21937.7	rpl-35 encodes a large ribosomal subunit L35 protein.	Predicted to enable mRNA binding activity. Predicted to be a structural constituent of ribosome. Predicted to be involved in maturation of LSU-rRNA from tricistronic rRNA transcript (SSU-rRNA, 5.8S rRNA, LSU-rRNA). Predicted to be located in ribosome. Predicted to be part of cytosolic large ribosomal subunit. Human ortholog(s) of this gene implicated in Diamond-Blackfan anemia 19. Is an ortholog …
WBGene00018898	F55F10.1	21808.2	N.A.	Predicted to enable ATP binding activity and ATP hydrolysis activity. Predicted to be involved in ribosomal large subunit assembly and ribosomal large subunit export from nucleus. Predicted to be located in nucleus. Predicted to be part of preribosome, large subunit precursor. Is an ortholog of human MDN1 (midasin AAA ATPase 1).
WBGene00004445	rpl-31	21684.5	rpl-31 encodes a large ribosomal subunit L31 protein.	Predicted to be a structural constituent of ribosome. Predicted to be involved in cytoplasmic translation. Predicted to be located in ribosome. Predicted to be part of cytosolic large ribosomal subunit. Is an ortholog of human RPL31 (ribosomal protein L31).
WBGene00003085	ccar-1	21640.7	N.A.	Predicted to enable hydrolase activity. Involved in hemidesmosome assembly. Predicted to be located in nucleus. Expressed widely. Is an ortholog of human CCAR1 (cell division cycle and apoptosis regulator 1).
WBGene00000898	daf-2	21519	daf-2 encodes a receptor tyrosine kinase that is the C. elegans insulin\/IGF receptor ortholog\; DAF-2 activity is required for a number of processes in C. elegans, including embryonic and larval development, formation of the developmentally arrested dauer larval stage (diapause), larval developmental timing, adult longevity, reproduction, fat storage, salt chemotaxis learning, and stress resista…	Enables PTB domain binding activity\; SH2 domain binding activity\; and protein kinase binding activity. Involved in several processes, including regulation of developmental process\; regulation of macromolecule metabolic process\; and response to stress. Acts upstream of with a negative effect on protein import into nucleus. Located in several cellular components, including cytoplasmic vesicle\;…
WBGene00004490	rps-21	21370.9	rps-21 encodes a small ribosomal subunit S21 protein\; by homology, RPS-21 is predicted to function in protein biosynthesis\; in C. elegans, RPS-21 activity is required for embryonic and germline development, as well as the overall health of the animal.	Predicted to be a structural constituent of ribosome. Predicted to be involved in endonucleolytic cleavage in ITS1 to separate SSU-rRNA from 5.8S rRNA and LSU-rRNA from tricistronic rRNA transcript (SSU-rRNA, 5.8S rRNA, LSU-rRNA) and endonucleolytic cleavage to generate mature 3'-end of SSU-rRNA from (SSU-rRNA, 5.8S rRNA, LSU-rRNA). Predicted to be located in cytosol\; ribosome\; and rough endopl…
WBGene00001595	gld-1	21294.4	gld-1 encodes a protein containing a K homology (KH) RNA binding domain\; GLD-1 is required for regulation of the mitosis\/meiosis decision during germline development (promotion of meiotic entry) in parallel with gld-2, gld-3, and nos-3 and also affects spermatogenesis\; GLD-1 physically interacts with the 3'- and 5'UTR of its putative mRNA targets in vitro to negatively regulate their translati…	Enables mRNA 3'-UTR binding activity\; mRNA 5'-UTR binding activity\; and single-stranded RNA binding activity. Involved in several processes, including negative regulation of macromolecule metabolic process\; oocyte fate determination\; and positive regulation of reproductive process. Located in P granule and cytosol. Expressed in body wall musculature\; germ line\; neurons\; ventral nerve cord\…
WBGene00003795	npp-9	21237.4	N.A.	Predicted to enable zinc ion binding activity. Predicted to contribute to GTPase activator activity. Involved in embryo development and nucleus organization. Part of nuclear pore. Human ortholog(s) of this gene implicated in brain disease\; inflammatory myofibroblastic tumor\; and multiple myeloma. Is an ortholog of human RANBP2 (RAN binding protein 2).
WBGene00002045	icd-1	21125.8	icd-1 encodes the C. elegans ortholog of the beta-subunit of the nascent polypeptide-associated complex (betaNAC)\; during development, icd-1 activity is required for prevention of ced-4-dependent, but ced-3-independent, programmed cell death and for normal embryonic development\; ICD-1 is widely expressed throughout development and colocalizes primarily with mitochondria.	Involved in embryo development and negative regulation of apoptotic process. Located in mitochondrion. Expressed in several structures, including germ line\; intestine\; pharynx\; preanal ganglion\; and somatic nervous system. Is an ortholog of human BTF3 (basic transcription factor 3) and BTF3L4 (basic transcription factor 3 like 4).
WBGene00000883	cyn-7	21082.5	cyn-7 encodes a cyclophilin A isoform\; while not tested for peptidyl-prolyl isomerase activity in vitro, it is very similar to CYN-3 and closely resembles the prototypical CypA, and is therefore likely to be a member of the cytosolic CsA-binding cyclophilin subfamily\; CYN-7 was required for embryonic viability in one set of mass RNAi assays.	Predicted to enable cyclosporin A binding activity and peptidyl-prolyl cis-trans isomerase activity. Predicted to be involved in protein folding. Predicted to be located in cytoplasm. Human ortholog(s) of this gene implicated in several diseases, including Bell's palsy\; aggressive periodontitis\; and gastrointestinal system cancer (multiple). Is an ortholog of human PPIA (peptidylprolyl isomeras…
WBGene00004448	rpl-34	21079.1	rpl-34 encodes a putative large ribosomal subunit L34 protein that inhibits DHC-1 in vivo\; RPL-34 is expressed in most somatic tissues of larvae and adults\; in mass RNAi assays, RPL-34 is required for embryonic and larval development, normally rapid growth, and normal body coloration.	Predicted to be a structural constituent of ribosome. Predicted to be involved in ribosome biogenesis. Predicted to be located in ribosome. Predicted to be part of cytosolic large ribosomal subunit. Is an ortholog of human RPL34 (ribosomal protein L34).
WBGene00013025	vha-13	20981.1	vha-13 encodes an ortholog of subunit A of the cytoplasmic (V1) domainof vacuolar proton-translocating ATPase (V-ATPase)\; VHA-13 is predictedto hydrolyse ATP as part of a cytosolic VHA-12\/VHA-13 heterohexamer,whose activity drives the V-ATPase rotor\; VHA-13 levels are lowered inmutants with either abnormally low or abnormally high calcineurinlevels, and elevated in mutants lacking both calcine…	Predicted to enable proton-transporting ATPase activity, rotational mechanism. Involved in lysosomal lumen acidification. Predicted to be part of proton-transporting V-type ATPase, V1 domain. Expressed in head. Human ortholog(s) of this gene implicated in autosomal recessive cutis laxa type IID and developmental and epileptic encephalopathy 93. Is an ortholog of human ATP6V1A (ATPase H+ transport…
WBGene00006536	tbb-1	20937.2	This gene encodes a homolog of mammalian beta-tubulin (TUBB) that is expressed at high levels in the germline\; TBB-1 is redundant for embryonic viability, due to its paralog TBB-2.	Predicted to enable GTP binding activity. Predicted to be a structural constituent of cytoskeleton. Predicted to be involved in microtubule cytoskeleton organization and mitotic cell cycle. Located in spindle microtubule. Expressed in several structures, including excretory gland cell\; intestine\; nervous system\; pharynx\; and uv1. Human ortholog(s) of this gene implicated in brain disease (mul…
WBGene00006725	rps-27A	20783.8	ubl-1 encodes a protein similar to Drosophila ubiquitin\/ ribosomal protein S27a that affects body length, fertility, and larval viability.	Predicted to enable protein tag activity and ubiquitin protein ligase binding activity. Predicted to be involved in modification-dependent protein catabolic process and protein ubiquitination. Predicted to be located in cytoplasm and nucleus. Predicted to be part of ribonucleoprotein complex. Is an ortholog of human RPS27A (ribosomal protein S27a) and RPS27AP5 (ribosomal protein S27a pseudogene 5…
WBGene00004032	pkc-1	20674.7	pkc-1 encodes a serine\/threonine protein kinase that is orthologous to mammalian protein kinase C epsilon (PRKCE), a member of the nPKC subgroup of the protein kinase C superfamily\; together with UNC-13, PKC-1 may act downstream of goa-1 to modulate phorbol ester-induced stimulation of acetylcholine release at NMJs\; PKC-1 positively regulates locomotion, and affects thermotaxis and chemotaxis …	Enables diacylglycerol-dependent serine\/threonine kinase activity. Involved in several processes, including nervous system process\; regulation of presynaptic dense core granule exocytosis\; and signaling. Located in cholinergic synapse and neuron projection. Expressed in ganglia\; linker cell\; and neurons. Human ortholog(s) of this gene implicated in cerebral infarction. Is an ortholog of huma…
WBGene00010959	nduo-1	20647.1	The nduo-1 gene resides on the mitochondrial chromosome, and encodes the protein NADH-ubiquinone oxidoreductase chain 1\; this is the C. elegans homolog of the core MT-ND1 of mitochondrial NADH:ubiquinone oxidoreductase (Complex I).	Predicted to enable NADH dehydrogenase (ubiquinone) activity. Predicted to contribute to NADH dehydrogenase activity. Predicted to be involved in aerobic respiration. Predicted to be located in mitochondrial inner membrane. Predicted to be part of respiratory chain complex I.
WBGene00004484	rps-15	20528.6	rps-15 encodes a small ribosomal subunit S15 protein.	Predicted to be a structural constituent of ribosome. Involved in determination of adult lifespan. Predicted to be located in ribosome. Predicted to be part of cytosolic small ribosomal subunit. Is an ortholog of human RPS15 (ribosomal protein S15).
WBGene00000214	asp-1	20435.7	asp-1 encodes a homolog of cathepsin D aspartic protease\; it is transcribed exclusively in intestinal cells of the late embryo and early larvae and is not observed in older larvae or adults\; ASP-1 is dispensable for neuronal degeneration.	Predicted to enable aspartic-type endopeptidase activity. Predicted to be involved in apoptotic process and proteolysis. Located in cytoplasm and external side of apical plasma membrane. Expressed in intestinal cell and intestine. Human ortholog(s) of this gene implicated in several diseases, including artery disease (multiple)\; chronic fatigue syndrome\; and congenital adrenal hyperplasia. Is a…
WBGene00002344	let-70	20250.9	let-70 encodes a class I E2 ubiquitin conjugating enzyme\; let-70 was identified in screens for essential genes and phenotypic analyses indicate that loss of let-70 activity results in embryonic and larval lethality with defects in sarcomere assembly\; purified LET-70 can stimulate the self-ubiquitylation activities of CHN-1 and UFD-2, E4 ubiquitin conjugation factors and, in addition, can stimul…	Enables ubiquitin conjugating enzyme activity and ubiquitin protein ligase binding activity. Involved in programmed cell death involved in cell development\; protein ubiquitination\; and ubiquitin-dependent protein catabolic process. Predicted to be located in nucleus. Expressed in several structures, including P1\; P2\; linker cell\; ventral ganglion\; and ventral nerve cord. Is an ortholog of h…
WBGene00006941	wnk-1	20250.3	wnk-1 is orthologous to the human gene PROTEIN KINASE, LYSINE-DEFICIENT 1 (PRKWNK1\; OMIM:605232), which when mutated leads to pseudohypoaldosteronism type II.	Enables molecular condensate scaffold activity. Involved in several processes, including cell volume homeostasis\; cellular hyperosmotic response\; and multicellular organismal-level water homeostasis. Predicted to be located in cytoplasm. Expressed in body wall musculature\; excretory cell\; and spermatheca. Used to study pseudohypoaldosteronism. Human ortholog(s) of this gene implicated in seve…
WBGene00018117	nlp-47	20163	N.A.	Predicted to be involved in neuropeptide signaling pathway.
WBGene00004241	puf-5	20157.2	puf-5 encodes a Pumilio protein\; PUF-5 is required, redundantly with PUF-6\/7, for translational repression of glp-1 mRNA in oocytes (via specific elements in the 3' UTR site), and for normal oocyte maturation (growth, organization, nuclear enlargement, yolk uptake, and localization of RME-2 to the plasma membrane) and early embryogenesis (cell divisions and eggshell formation)\; since glp-1 mut…	Enables mRNA 3'-UTR binding activity. Involved in positive regulation of embryonic development. Located in P granule. Expressed in germ line and oocyte.
WBGene00004187	prp-8	20105.1	prp-8 is orthologous to the human gene SIMILAR TO U5 SNRNP-SPECIFIC PROTEIN (220 KD), ORTHOLOG OF S.	Predicted to enable pre-mRNA intronic binding activity and snRNA binding activity. Predicted to be involved in spliceosomal tri-snRNP complex assembly. Predicted to be located in nucleus. Predicted to be part of U5 snRNP and catalytic step 2 spliceosome. Expressed in germ line. Used to study retinitis pigmentosa 13. Human ortholog(s) of this gene implicated in retinitis pigmentosa 13. Is an ortho…
WBGene00001423	fib-1	20073.8	fib-1 encodes the C. elegans ortholog of fibrillarin and Saccharomyces cerevisiae Nop1p, an essential component of the U3 SnoRNP\; FIB-1 localizes to the nucleolus.	Predicted to enable RNA binding activity\; histone H2AQ104 methyltransferase activity\; and rRNA methyltransferase activity. Involved in nucleologenesis and positive regulation of translation. Located in nucleolus and nucleoplasm. Is an ortholog of human FBL (fibrillarin).
WBGene00004483	rps-14	20073.1	rps-14 encodes a small ribosomal subunit S14 protein\; by homology, RPS-14 is predicted to function in protein biosynthesis\; in C. elegans, RPS-14 activity is required for embryonic and germline development, as well as the overall health of the animal\; RPS-14 co-immuoprecipitates with ALG-1, a C. elegans Argonaut ortholog.	Predicted to be a structural constituent of ribosome. Predicted to be involved in ribosomal small subunit assembly and translation. Predicted to be located in cytoplasm\; nucleolus\; and ribosome. Predicted to be part of cytosolic small ribosomal subunit and small-subunit processome. Expressed in tail. Human ortholog(s) of this gene implicated in chromosome 5q deletion syndrome. Is an ortholog of…
WBGene00004132	ifet-1	20015.9	N.A.	Predicted to enable mRNA binding activity. Involved in negative regulation of translation. Located in P granule. Expressed in gonad. Is an ortholog of human EIF4ENIF1 (eukaryotic translation initiation factor 4E nuclear import factor 1).
WBGene00001971	hmg-1.1	20015.2	hmg-1.1 encodes a member of the high mobility group (HMG) family of proteins.	Predicted to enable DNA binding activity, bending. Predicted to be involved in regulation of transcription by RNA polymerase II. Predicted to be located in nucleus. Expressed in head neurons\; pharynx\; tail neurons\; ventral nerve cord\; and vulva.
WBGene00004422	rpl-11.1	20013.3	rpl-11.1 encodes a large ribosomal subunit L11 protein.	Predicted to enable RNA binding activity. Predicted to be a structural constituent of ribosome. Predicted to be involved in translation. Predicted to be located in cytoplasm\; nucleus\; and ribosome. Predicted to be part of cytosolic large ribosomal subunit. Expressed in germ line. Human ortholog(s) of this gene implicated in Diamond-Blackfan anemia 7 and T-cell acute lymphoblastic leukemia. Is a…
WBGene00004420	rpl-9	19714.9	rpl-9 encodes a large ribosomal subunit L9 protein that affects fertility and embryonic viability.	Predicted to be a structural constituent of ribosome. Involved in determination of adult lifespan. Predicted to be located in ribosome. Predicted to be part of cytosolic large ribosomal subunit. Expressed in intestine and tail. Is an ortholog of human RPL9 (ribosomal protein L9).
WBGene00004076	pod-2	19656.4	pod-2 encodes an acetyl-CoA carboxylase\; by sequence similarity, POD-2 is predicted to catalyze the first step in de novo fatty acid biosynthesis\; pod-2 is required for proper embryonic polarity and for osmotic protection of the eggshell\; pod-2 activity is also required for molting.	Predicted to enable acetyl-CoA carboxylase activity. Involved in several processes, including establishment or maintenance of epithelial cell apical\/basal polarity\; nematode larval development\; and polarity specification of anterior\/posterior axis. Predicted to be located in endoplasmic reticulum membrane and mitochondrion. Expressed in CANL\; CANR\; and excretory duct. Used to study muscular…
WBGene00000608	col-19	19611.3	col-19 encodes a member of the collagen superfamily containing collagen triple helix repeats (20 copies) that is required for normal structure of the alae\; expressed during the L2-to-dauer and L4-to-adult molts with strongest expression in adult animals.	A structural constituent of collagen and cuticulin-based cuticle. Involved in cuticle development involved in collagen and cuticulin-based cuticle molting cycle. Located in alae of collagen and cuticulin-based cuticle extracellular matrix and annuli extracellular matrix. Expressed in cuticle\; hyp7 syncytium\; syncytium\; vulva\; and in male.
WBGene00021043	pck-1	19606.1	pck-1 is one of three C. elegans genes that encode proteins with similarity to phosphoenolpyruvate carboxykinase (PEPCK)\; by similarity, the products of W05G11.6 are predicted to function in gluconeogenesis.	Predicted to enable manganese ion binding activity and phosphoenolpyruvate carboxykinase (GTP) activity. Predicted to be involved in several processes, including carboxylic acid metabolic process\; cellular response to glucose stimulus\; and gluconeogenesis. Located in cytosol and striated muscle dense body. Expressed in several structures, including body wall musculature\; preanal ganglion\; som…
WBGene00006779	unc-43	19601.6	unc-43 encodes the C. elegans ortholog of type II calcium\/calmodulin-dependent protein kinase (CaMKII)\; unc-43 activity is required for a number of processes, including locomotion, neuronal cell fate specification and regulation of synaptic density, egg laying, defecation, and meiotic maturation\; in regulating some of these processes, unc-43 acts in concert with MAPKKK and G protein signaling …	Enables calcium\/calmodulin-dependent protein kinase activity\; identical protein binding activity\; and transmembrane transporter binding activity. Involved in MAPK cascade\; medium-term memory\; and positive regulation of gene expression. Acts upstream of or within serotonin biosynthetic process. Located in axon cytoplasm. Expressed in several structures, including AWC\; copulatory spicule\; go…
WBGene00004435	rpl-23	19438.8	rpl-23 encodes a large ribosomal subunit L23 protein.	Predicted to enable large ribosomal subunit rRNA binding activity. Predicted to be a structural constituent of ribosome. Predicted to be involved in translation. Predicted to be located in ribosome. Predicted to be part of cytosolic large ribosomal subunit. Is an ortholog of human RPL23 (ribosomal protein L23).
WBGene00004357	rho-1	19374.1	rho-1 encodes a Rho GTPase\; rho-1 activity is required for regulation of a number of actin filament-based processes including embryonic polarity, cell migration, cell shape changes, muscle contraction, and neurite outgrowth\; in addition, RHO-1 is required for both DGK-1- and UNC-13-dependent and independent regulation of synaptic signaling at neuromuscular junctions\; as RHO-1 binds DGK-1 in vi…	Enables several functions, including GTP binding activity\; GTPase activating protein binding activity\; and GTPase activity. Involved in several processes, including actomyosin structure organization\; positive regulation of acetylcholine secretion, neurotransmission\; and positive regulation of locomotion. Located in cell cortex and cleavage furrow. Expressed widely. Human ortholog(s) of this g…
WBGene00011232	pck-2	19335.1	pck-2 is one of three C. elegans genes that encode proteins with similarity to phosphoenolpyruvate carboxykinase (PEPCK)\; by similarity, the products of pck-2 are predicted to function in gluconeogenesis.	Predicted to enable manganese ion binding activity and phosphoenolpyruvate carboxykinase (GTP) activity. Predicted to be involved in several processes, including carboxylic acid metabolic process\; cellular response to glucose stimulus\; and gluconeogenesis. Predicted to be located in cytosol and mitochondrion. Expressed in several structures, including body wall musculature\; hypodermis\; muscle…
WBGene00008549	din-1	19193.4	N.A.	Predicted to enable ubiquitin protein ligase activity. Predicted to be involved in protein ubiquitination and ubiquitin-dependent protein catabolic process. Located in nucleus. Expressed in several structures, including body wall musculature\; hermaphrodite distal tip cell\; intestine\; pharynx\; and vulval precursor cell. Human ortholog(s) of this gene implicated in esophagus squamous cell carci…
WBGene00002007	hsp-3	19140.7	hsp-3 encodes one of two C. elegans heat shock response 70 (hsp70) proteins homologous to mammalian grp78\/BiP (glucose regulated protein 78\/immunoglobulin heavy chain-binding protein, OMIM:138120)\; HSP-3 likely functions as a molecular chaperone, and is expressed constitutively (expression is not heat inducible) throughout development with greatest abundance during the L1 larval stage\; hsp-3 …	Predicted to enable ATP hydrolysis activity\; heat shock protein binding activity\; and protein folding chaperone. Involved in IRE1-mediated unfolded protein response. Predicted to be located in endoplasmic reticulum lumen\; membrane\; and nucleus. Predicted to be part of endoplasmic reticulum chaperone complex. Expressed in several structures, including germ line\; hypodermis\; intestinal muscle…
WBGene00004489	rps-20	19073.5	rps-20 encodes a small ribosomal subunit S20 protein.	Predicted to be a structural constituent of ribosome. Predicted to be involved in translation. Predicted to be located in ribosome. Predicted to be part of cytosolic small ribosomal subunit. Is an ortholog of human RPS20 (ribosomal protein S20).
WBGene00002717	let-526	18960.7	let-526 encodes a homolog of a component of the SWI\/SNF complex\; the let-526(h185) mutation results in early larval lethality.	Predicted to enable DNA binding activity. Predicted to contribute to nucleosome binding activity. Involved in gonad development\; nematode larval development\; and positive regulation of transcription by RNA polymerase II. Located in nucleus. Expressed in several structures, including excretory cell\; gonad\; pharynx\; tail precursor cell\; and vulva. Used to study alcohol use disorder and cancer…
WBGene00002229	klp-19	18666.9	klp-19 encodes a plus-end-directed microtubule motor protein that is most closely related to motors of the kinesin-4 family\; KLP-19 activity is essential for embryonic and larval development and is required for generating a force that aligns sister chromatid kinetochores directly opposite the spindle poles thus ensuring proper holocentric chromosome segregation\; KLP-19 expression is detected in…	Predicted to enable ATP hydrolysis activity\; microtubule binding activity\; and microtubule motor activity. Involved in meiotic chromosome condensation and meiotic spindle midzone assembly. Located in condensed nuclear chromosome\; nucleoplasm\; and spindle. Expressed in germ line. Human ortholog(s) of this gene implicated in non-syndromic X-linked intellectual disability 100. Is an ortholog of …
WBGene00022235	sqd-1	18639	N.A.	Predicted to enable RNA binding activity. Predicted to be involved in mRNA splicing, via spliceosome. Predicted to be located in nucleus. Predicted to be part of catalytic step 2 spliceosome. Human ortholog(s) of this gene implicated in autosomal dominant limb-girdle muscular dystrophy type 3 and hepatocellular carcinoma. Is an ortholog of human HNRNPAB (heterogeneous nuclear ribonucleoprotein A\…
WBGene00001447	flp-4	18512.6	N.A.	Predicted to be involved in neuropeptide signaling pathway. Predicted to be located in extracellular region. Expressed in nerve ring\; pharyngeal neurons\; and sensory neurons.
WBGene00001196	egl-30	18343	egl-30 encodes an ortholog of the heterotrimeric G protein alpha subunit Gq (Gq\/G11 class) that affects viability, locomotion, egg laying, synaptic transmission, and pharyngeal pumping\; it genetically interacts with the goa-1 pathway, and is probably expressed ubiquitously, with highest expression in excitable cells.	Predicted to enable G protein-coupled receptor binding activity\; G-protein beta\/gamma-subunit complex binding activity\; and GTPase activity. Involved in several processes, including cellular response to dopamine\; positive regulation of protein localization\; and regulation of secretion. Located in axon\; cell cortex\; and neuronal cell body. Expressed in several structures, including vulval c…
WBGene00002280	let-2	18280	let-2 encodes an alpha-2 type IV collagen, probably most closely equivalent to the human gene COL4A2 (OMIM:120090) on the basis of biological function\; LET-2 is required for embryonic development and is a component of the basement membrane between muscle and hypodermis\; LET-2 interacts with UNC-105, a mechanosensory ion channel of the degenerin ion channel superfamily that is expressed in muscl…	An extracellular matrix structural constituent conferring tensile strength. Involved in several processes, including embryo development\; gonad morphogenesis\; and regulation of distal tip cell migration. Located in basement membrane. Part of collagen type IV trimer. Expressed in several structures, including coelomocyte\; egg-laying apparatus\; rectal muscle\; spermatheca\; and tail. Human ortho…
WBGene00011980	T24B8.7	18202.4	N.A.	Predicted to enable cysteine-type deubiquitinase activity. Predicted to be involved in regulation of protein stability. Predicted to be located in cytosol and nucleus. Human ortholog(s) of this gene implicated in Y-linked spermatogenic failure 2\; female-restricted syndromic X-linked intellectual disability 99\; and non-syndromic X-linked intellectual disability 99. Is an ortholog of human USP24 …
WBGene00012896	snrp-200	17980.4	N.A.	Predicted to enable RNA helicase activity. Predicted to be involved in spliceosome conformational change to release U4 (or U4atac) and U1 (or U11). Predicted to be located in nucleus. Predicted to be part of spliceosomal complex. Expressed in excretory cell\; gonad\; head ganglion\; intestine\; and pharynx. Used to study retinitis pigmentosa 33. Human ortholog(s) of this gene implicated in retini…
WBGene00017166	aldo-2	17910.8	aldo-2 encodes a fructose-bisphosphate aldolase homologous to human ALDOB, which when mutated leads to fructosemia, hereditary fructose intolerance (OMIM:229600).	Predicted to enable fructose-bisphosphate aldolase activity. Predicted to be involved in fructose 1,6-bisphosphate metabolic process and glycolytic process. Predicted to be located in cytosol and heterochromatin. Expressed in several structures, including hyp7 syncytium. Human ortholog(s) of this gene implicated in autoimmune disease of the nervous system. Is an ortholog of human ALDOC (aldolase,…
WBGene00004494	rps-25	17883.2	rps-25 encodes a small ribosomal subunit S25 protein.	Predicted to be a structural constituent of ribosome. Predicted to be located in ribosome. Predicted to be part of cytosolic small ribosomal subunit. Is an ortholog of human RPS25 (ribosomal protein S25).
WBGene00010963	nduo-4	17828	The nduo-4 gene resides on the mitochondrial chromosome, and encodes the protein NADH-ubiquinone oxidoreductase chain 4\; this is the C. elegans homolog of the core MT-ND4 subunit of mitochondrial NADH:ubiquinone oxidoreductase (Complex I).	Predicted to enable ubiquinone binding activity. Predicted to contribute to NADH dehydrogenase activity. Predicted to be involved in aerobic respiration and electron transport coupled proton transport. Predicted to be located in mitochondrial membrane. Predicted to be part of respiratory chain complex I.
WBGene00004450	rpl-36	17813.6	rpl-36 encodes a large ribosomal subunit L36 protein\; by homology, RPL-36 is predicted to function in protein biosynthesis\; in C. elegans, RPL-36 activity is required for embryonic and germline development and normal postembryonic growth rates.	Predicted to be a structural constituent of ribosome. Predicted to be involved in cytoplasmic translation. Predicted to be located in cytosol and ribosome. Predicted to be part of cytosolic large ribosomal subunit. Is an ortholog of human RPL36 (ribosomal protein L36).
WBGene00006587	tnt-2	17797.1	N.A.	Predicted to enable tropomyosin binding activity. Predicted to be involved in muscle contraction. Predicted to be part of troponin complex. Human ortholog(s) of this gene implicated in several diseases, including distal arthrogryposis type 2B2\; intrinsic cardiomyopathy (multiple)\; and nemaline myopathy (multiple). Is an ortholog of human TNNT1 (troponin T1, slow skeletal type)\; TNNT2 (troponin…
WBGene00004499	fau-1	17764.3	rps-30 encodes two proteins, a small ribosomal subunit S30 protein and ubiquitin, which is cleaved from the ribosomal protein posttranslationally\; by homology, S30 is predicted to function in protein biosynthesis and ubiquitin in protein degradation\; in C. elegans, loss of rps-30 function via RNA-mediated interference (RNAi) does not result in any obvious abnormalities.	Predicted to be a structural constituent of ribosome. Predicted to be involved in translation. Predicted to be located in cytosol and ribosome. Predicted to be part of cytosolic small ribosomal subunit. Is an ortholog of human FAU (FAU ubiquitin like and ribosomal protein S30 fusion).
WBGene00004492	rps-23	17747	rps-23 encodes a small ribosomal subunit S23 protein\; by homology, RPS-23 is predicted to function in protein biosynthesis\; in C. elegans, RPS-23 activity is required for germline development, vulval morphogenesis, and the overall health of the animal.	Predicted to be a structural constituent of ribosome. Predicted to be involved in cytoplasmic translation. Predicted to be located in ribosome. Predicted to be part of cytosolic small ribosomal subunit. Human ortholog(s) of this gene implicated in brachycephaly, trichomegaly, and developmental delay. Is an ortholog of human RPS23 (ribosomal protein S23).
WBGene00000475	cey-4	17740.6	cey-4 encodes a Y box-containing protein with no known function in vivo\;CEY-4 associates with CGH-1 and CEY-2\/3 in cytoplasmic particles of thegonad and early embryo.	Enables ribonucleoprotein complex binding activity. Predicted to be involved in regulation of gene expression. Part of ribonucleoprotein complex. Expressed in germ cell\; germ line\; and somatic cell. Is an ortholog of human YBX1 (Y-box binding protein 1) and YBX2 (Y-box binding protein 2).
WBGene00009122	tct-1	17731.8	N.A.	Predicted to enable calcium ion binding activity. Located in endoplasmic reticulum. Is an ortholog of human TPT1 (tumor protein, translationally-controlled 1).
WBGene00010960	atp-6	17729.6	The atp-6 gene resides on the mitochondrial chromosome, and encodes the protein ATP synthase subunit a\; this is the C. elegans homolog of the MT-ATP6 mitochondrial membrane ATP synthase (Complex V).	Predicted to enable proton transmembrane transporter activity. Predicted to contribute to proton-transporting ATP synthase activity, rotational mechanism. Predicted to be involved in proton motive force-driven ATP synthesis. Predicted to be located in mitochondrial inner membrane. Predicted to be part of proton-transporting ATP synthase complex.
WBGene00001935	his-61	17706.1	his-61 encodes an H2A histone.	Predicted to enable DNA binding activity and protein heterodimerization activity. Predicted to be a structural constituent of chromatin. Predicted to be part of nucleosome. Expressed in somatic cell. Human ortholog(s) of this gene implicated in oral mucosa leukoplakia and oral squamous cell carcinoma. Is an ortholog of human H2AX (H2A.X variant histone).
WBGene00013311	sec-61.A	17690.5	N.A.	Predicted to enable protein transmembrane transporter activity\; ribosome binding activity\; and signal sequence binding activity. Predicted to be involved in SRP-dependent cotranslational protein targeting to membrane, translocation and post-translational protein targeting to membrane, translocation. Predicted to be located in endomembrane system and membrane. Predicted to be part of Sec61 trans…
WBGene00001851	hif-1	17657.4	hif-1 encodes an ortholog of the mammalian hypoxia-induced factor HIF-1, and is required for survival in hypoxic environments (1\% oxygen) that have no effect on wild-type C. elegans.	Enables DNA-binding transcription factor activity and RNA polymerase II-specific DNA-binding transcription factor binding activity. Involved in several processes, including determination of adult lifespan\; positive regulation of transcription by RNA polymerase II\; and response to stress. Located in nucleus. Expressed widely. Used to study cancer and cardiovascular system disease. Human ortholog…
WBGene00004439	rpl-23A.2	17578.9	rpl-25.2 encodes a large ribosomal subunit L23a protein.	Predicted to be a structural constituent of ribosome. Predicted to be involved in translation. Predicted to be located in ribosome. Predicted to be part of cytosolic large ribosomal subunit. Is an ortholog of human RPL23A (ribosomal protein L23a).
WBGene00003150	mbk-2	17521.6	mbk-2 encodes one of two C. elegans members of the DYRK (dual-specificity Yak1-related kinase) family of proteins that includes S. cerevisiae Yak1 and the Drosophila minibrain and DYRK2 kinases\; MBK-2 activity is required maternally for the oocyte-to-egg transition that occurs during the earliest stages of embryonic development\; specifically, MBK-2 is required for: 1) posterior localization of …	Enables protein serine\/threonine kinase activity and protein tyrosine kinase activity. Involved in several processes, including P granule disassembly\; asymmetric protein localization involved in cell fate determination\; and positive regulation of proteasomal ubiquitin-dependent protein catabolic process. Located in cell cortex and intracellular membraneless organelle. Expressed in several stru…
WBGene00007709	clec-87	17443.5	clec-87 encodes a C-type lectin, paralogous to CLEC-88, C25B8.4, F26D10.12, and ZK858.3\; CLEC-87 has a single chondroitin attachment site verified by mass spectrometry\; clec-87 expression is upregulated in response to pathogen infection.	Predicted to enable carbohydrate binding activity and pattern recognition receptor activity. Predicted to be involved in immune response. Predicted to be located in external side of plasma membrane. Is an ortholog of human CLEC2L (C-type lectin domain family 2 member L)\; KLRB1 (killer cell lectin like receptor B1)\; and KLRG1 (killer cell lectin like receptor G1).
WBGene00003963	pdi-2	17417	pdi-2 encodes a protein disulfide isomerase beta subunit\; by homology, PDI-2 is predicted to function in oxidative protein folding in the endoplasmic reticulum (ER)\; PDI-2 activity is required for several organismal processes including body morphology, locomotion, fertility, molting, and collagen deposition\; pdi-2 transcript levels are increased in response to ER stress\; pdi-2 is expressed in…	Enables protein disulfide isomerase activity and protein-glutamine gamma-glutamyltransferase activity. Contributes to peptidyl-proline 4-dioxygenase activity. Involved in macromolecule modification. Located in endoplasmic reticulum. Part of procollagen-proline 4-dioxygenase complex. Expressed in several structures, including germ line and hypodermis. Human ortholog(s) of this gene implicated in C…
WBGene00002190	kin-2	17413.4	kin-2 encodes a predicted regulatory subunit of a cAMP-dependent protein kinase that may act downstream of, or in parallel to, ric-8.	Predicted to enable cAMP binding activity\; cAMP-dependent protein kinase inhibitor activity\; and protein kinase A catalytic subunit binding activity. Involved in medium-term memory\; negative regulation of oocyte maturation\; and regulation of establishment of cell polarity. Located in cytosol and membrane. Part of cAMP-dependent protein kinase complex. Expressed in body wall musculature\; hypo…
WBGene00019900	vdac-1	17315.1	N.A.	Predicted to enable voltage-gated monoatomic anion channel activity. Involved in mitochondrion organization. Acts upstream of or within with a positive effect on olfactory behavior. Located in mitochondrion. Expressed in AWCL and AWCR. Human ortholog(s) of this gene implicated in Parkinson's disease\; Parkinsonism\; and prostate cancer. Is an ortholog of human VDAC1 (voltage dependent anion chann…
WBGene00004409	rplp-1	17294.1	rla-1 encodes an acidic ribosomal subunit protein P1.	Predicted to enable protein kinase activator activity and ribonucleoprotein complex binding activity. Predicted to be a structural constituent of ribosome. Predicted to be involved in cytoplasmic translation. Predicted to be located in cytosolic ribosome. Predicted to be part of cytosolic large ribosomal subunit. Is an ortholog of human RPLP1 (ribosomal protein lateral stalk subunit P1).
WBGene00021088	W08E12.7	17254.5	N.A.	Expressed in gonad and pharynx. Is an ortholog of human PA2G4 (proliferation-associated 2G4). Human PA2G4 enables nucleic acid binding activity\; transcription corepressor activity\; and ubiquitin protein ligase binding activity.
WBGene00001173	egl-4	17250.5	egl-4 encodes a cyclic GMP-dependent protein kinase that may act through the TGF-beta signaling pathway to relay sensory cues that modulate chemosensory behavior, dauer formation, foraging, egg laying, body size, and endoreduplication in response to dietary restriction\; egl-4 is also required for lethargus, a sleep-like state that is induced before each of the four larval molts\; in addition, ge…	Enables cGMP-dependent protein kinase activity. Involved in several processes, including enzyme-linked receptor protein signaling pathway\; regulation of multicellular organismal process\; and regulation of signal transduction. Located in cytosol and nucleus. Expressed in several structures, including marginal cell\; nerve ring\; neurons\; spermatheca\; and vulval muscle. Used to study ciliopathy…
WBGene00004487	rps-18	17212.8	rps-18 encodes a small ribosomal subunit S18 protein.	Predicted to enable RNA binding activity. Predicted to be a structural constituent of ribosome. Predicted to be involved in translation. Predicted to be located in cytosol. Predicted to be part of small ribosomal subunit. Is an ortholog of human RPS18 (ribosomal protein S18).
WBGene00004075	pod-1	17204.3	The pod-1 gene encodes a coronin-like protein required for asymmetry along the anterior-posterior axis at the beginning of embryonic development.	Enables actin filament binding activity. Located in cell cortex of cell tip and cleavage furrow. Is an ortholog of human CORO7 (coronin 7).
WBGene00003903	pab-2	17096.4	pab-2 encodes a polyadenylate-binding protein 1 homolog with high similarity to human PABP 1.	Predicted to enable mRNA 3'-UTR binding activity\; poly(A) binding activity\; and poly(U) RNA binding activity. Located in cytoplasm. Is an ortholog of human PABPC1 (poly(A) binding protein cytoplasmic 1) and PABPC3 (poly(A) binding protein cytoplasmic 3).
WBGene00001459	flp-16	16936.1	flp-16 encodes a predicted FMRFamide-like peptide neurotransmitter that inhibits action potentials in the pharyngeal muscle when applied to the pharynx of dissected worms.	Involved in cellular response to carbon dioxide\; negative regulation of nematode pharyngeal pumping\; and negative regulation of striated muscle contraction. Predicted to be located in extracellular region. Expressed in nerve ring.
WBGene00017900	F28E10.1	16929.5	N.A.	Enriched in several structures, including XXX cell\; anchor cell\; head mesodermal cell\; neurons\; and ventral nerve cord based on tiling array\; RNA-seq\; single-cell RNA-seq\; and microarray studies. Is affected by several genes including atf-7\; mter-4\; and etr-1 based on tiling array\; microarray\; and RNA-seq studies. Is affected by nine chemicals including stavudine\; Zidovudine\; and Pso…
WBGene00000140	anc-1	16916.6	anc-1 encodes a protein, orthologous to Drosophila MSP 300 and mammalian SYNE1 and SYNE2 proteins\; ANC-1 has coiled regions, a nuclear envelope localization domain (the KASH domain) and an actin-binding domain\; ANC-1 affects the positioning of nuclei and mitochondria within the cytoskeleton\; ANC-1 is expressed in the cytoplasm, but is localized to the nuclear periphery in an UNC-84 dependent m…	Predicted to enable actin binding activity and kinesin binding activity. Involved in cytoskeleton organization\; nucleus organization\; and pronuclear migration. Located in nuclear envelope and perinuclear region of cytoplasm. Expressed in several structures, including body wall musculature\; intestinal cell\; and vulval muscle. Used to study Emery-Dreifuss muscular dystrophy. Human ortholog(s) o…
WBGene00006626	tsn-1	16882.7	tsn-1 encodes the C. elegans ortholog of Tudor-SN (tudor staphylococcal nuclease)\; TSN-1 is a component of the RNA-induced silencing complex (RISC) and its activity is required for proper function of the let-7 miRNA in vivo\; TSN-1 is found in both the nucleus and the cytosol.	Predicted to enable RNA binding activity and nuclease activity. Involved in miRNA-mediated post-transcriptional gene silencing. Located in cytosol and nucleus. Part of RISC complex. Expressed in head and tail. Is an ortholog of human SND1 (staphylococcal nuclease and tudor domain containing 1).
WBGene00015083	egg-1	16868	egg-1 encodes a LDL-receptor repeat-containing protein that is required for fertilization\; egg-1 acts redundantly with a similar protein, egg-2, and both proteins are expressed in the developing oocyte\; egg-1 is not required for male fertility\; egg-1 localizes to the oocyte plasma membrane\; the structure and localization of the egg-1 protein suggest that it is required together with egg-2, fo…	Predicted to enable signaling receptor activity. Involved in positive regulation of protein localization to cell periphery and sexual reproduction. Located in plasma membrane. Expressed in germ line.
WBGene00000716	col-143	16861.5	N.A.	Predicted to be a structural constituent of cuticle. Predicted to be located in membrane. Predicted to be part of collagen trimer.
WBGene00002064	iff-1	16847.6	iff-1 encodes an eIF-5A homolog that affects fertility and is required for germ cell proliferation and for some P granule components to localize properly\; expression is germline specific and mRNA is expressed in the distal region of gonads where germ cells actively proliferate.	Predicted to enable translation elongation factor activity. Involved in gamete generation and protein localization. Predicted to be located in cytoplasm. Expressed in germ line and gonad. Human ortholog(s) of this gene implicated in colorectal cancer. Is an ortholog of human EIF5A (eukaryotic translation initiation factor 5A).
WBGene00004491	rps-15A	16788.5	rps-22 encodes a small ribosomal subunit S15a protein.	Predicted to be a structural constituent of ribosome. Involved in determination of adult lifespan. Predicted to be located in ribosome. Predicted to be part of cytosolic small ribosomal subunit. Human ortholog(s) of this gene implicated in Diamond-Blackfan anemia 20. Is an ortholog of human RPS15A (ribosomal protein S15a).
WBGene00004078	pos-1	16763.6	pos-1 encodes a CCCH-type zinc-finger protein\; during embryogenesis, maternally provided POS-1 is essential for proper fate specification of germ cells, intestine, pharynx, and hypodermis\; POS-1's role in cell fate specification is likely as a translational regulator, as POS-1 is required, in posterior blastomeres, for positive regulation of apx-1 mRNA translation and negative regulation of glp…	Enables mRNA 3'-UTR binding activity\; poly(U) RNA binding activity\; and transcription corepressor activity. Involved in several processes, including cell fate specification\; embryonic pattern specification\; and negative regulation of transcription by RNA polymerase II. Located in P granule. Expressed in several structures, including Psub4\; germ line\; neurons\; oocyte\; and rectal gland cell…
WBGene00006801	unc-68	16644.1	unc-68 encodes a ryanodine receptor ortholog that is expressed in body-wall muscle cells and is required for normal body tension and locomotion\; unc-68 mutants are flaccid, sluggish, and resistant to ryanodine, but have normal muscle ultrastructure\; UNC-68 is dispensable for excitation-contraction coupling itself, but may amplify its calcium signals\; the unc-68\/kra-1(kh30) mutation is an S144…	Predicted to enable calcium ion binding activity and ryanodine-sensitive calcium-release channel activity. Involved in locomotion\; positive regulation of programmed cell death\; and protein localization to organelle. Located in I band and sarcoplasmic reticulum. Expressed in body wall musculature\; intestine\; neurons\; and non-striated muscle. Used to study congenital myopathy 1A and malignant …
WBGene00009772	ztf-7	16563.4	N.A.	Predicted to enable zinc ion binding activity. Predicted to be located in cytoplasm. Is an ortholog of human ZNF277 (zinc finger protein 277).
WBGene00004148	pqn-65	16517.6	The protein product of this gene is predicted to contain a glutamine\/asparagine (Q\/N)-rich ('prion') domain, by the algorithm of Michelitsch and Weissman (as of the WS77 release of WormBase, i.e., in wormpep77).	Expressed in gonad.
WBGene00012769	hrpu-1	16476.9	N.A.	Predicted to enable RNA binding activity. Predicted to be involved in alternative mRNA splicing, via spliceosome. Predicted to be located in nucleus. Human ortholog(s) of this gene implicated in colorectal cancer and developmental and epileptic encephalopathy 54. Is an ortholog of human HNRNPU (heterogeneous nuclear ribonucleoprotein U) and HNRNPUL2 (heterogeneous nuclear ribonucleoprotein U like…
WBGene00003901	paa-1	16460.1	paa-1 encodes the sole C. elegans homolog of PR65, the structural subunit of protein phosphatase 2A (PP2A)\; paa-1 is an essential gene, required in RNAi assays for embryonic viability, fertility, and cuticular integrity\; PAA-1 protein physically interacts with LET-92, the PP2A catalytic subunit, and with RSA-1, a PP2A regulatory subunit\; PAA-1 also physically interacts with SMG-5\; PAA-1 local…	Enables DEAD\/H-box RNA helicase binding activity. Involved in embryo development and mitotic spindle organization. Located in P granule\; microtubule cytoskeleton\; and nuclear envelope. Part of protein phosphatase type 2A complex. Human ortholog(s) of this gene implicated in autosomal dominant intellectual developmental disorder 36 and lung cancer. Is an ortholog of human PPP2R1A (protein phosp…
WBGene00001538	gcy-12	16395.6	gcy-12 encodes a membrane guanylyl cyclase\; a gcy-12::GFP reporter is expressed in the PHA neurons as well as in a number of head sensory neurons including AFD, AWC, and ASE\; when expressed in COS-M6 cells, GCY-12 exhibits temperature-dependent guanylyl cyclase activity.	Enables guanylate cyclase activity. Involved in negative regulation of dauer larval development\; regulation of growth\; and regulation of locomotion involved in locomotory behavior. Located in dendrite\; non-motile cilium\; and perikaryon. Expressed in excretory gland cell\; ganglia\; head muscle\; and head neurons.
WBGene00020131	gcy-28	16360.3	gcy-28 encodes a membrane-bound guanylyl cyclase with an extracellular ligand binding domain, a transmembrane domain, and a guanylyl cyclase domain\; GCY-28 regulates odor preferences in AWC sensory neurons\; gcy-28 regulates the sensory integration in the nervous system and that function of gcy-28 at adulthood is sufficient for normal sensory integration\; GCY-28 in AIA interneurons is important…	Enables guanylate cyclase activity. Involved in chemotaxis\; olfactory behavior\; and sensory perception. Located in cell body and neuron projection. Expressed in body wall musculature\; gonad\; hypodermis\; intestine\; and neurons. Human ortholog(s) of this gene implicated in artery disease (multiple) and bone development disease (multiple). Is an ortholog of human NPR1 (natriuretic peptide rece…
WBGene00001537	gcy-11	16352.1	N.A.	Predicted to enable guanylate cyclase activity and peptide receptor activity. Predicted to be involved in cGMP biosynthetic process and receptor guanylyl cyclase signaling pathway. Predicted to be located in plasma membrane. Expressed in pharyngeal muscle cell.
WBGene00004442	rpl-28	16348.5	rpl-28 encodes a large ribosomal subunit L28 protein.	Predicted to be a structural constituent of ribosome. Predicted to be involved in translation. Predicted to be located in ribosome. Predicted to be part of cytosolic large ribosomal subunit. Is an ortholog of human RPL28 (ribosomal protein L28).
WBGene00003230	mex-5	16317	mex-5 encodes a novel protein that contains two CCCH zinc finger motifs\; maternally provided MEX-5, which functions partly redundantly with the highly similar CCCH finger protein MEX-6, is essential for transducing polarity cues and establishing soma\/germline asymmetry in the early embryo\; in regulating soma\/germline asymmetry, MEX-5 interacts with, and activates, the SOCS-box protein ZIF-1, …	Enables RNA binding activity\; protein domain specific binding activity\; and protein kinase binding activity. Involved in regulation of protein localization. Located in P granule and centrosome. Expressed in germ line\; head muscle\; head neurons\; intestine\; and somatic nervous system.
WBGene00011061	wago-1	16194.2	N.A.	Enables DEAD\/H-box RNA helicase binding activity. Predicted to be involved in regulatory ncRNA-mediated post-transcriptional gene silencing. Located in P granule. Expressed in germ line and in male.
WBGene00002066	ifg-1	16148.9	ifg-1 encodes, by alternative splicing, two orthologs of the translation initiation factor 4F, ribosome\/mRNA-bridging subunit (eIF-4G)\; by homology, IFG-1 is predicted to function in poly(A) tail-dependent translation initiation\; loss of ifg-1 activity in adult animals extends lifespan.	Predicted to enable mRNA binding activity and translation initiation factor activity. Predicted to be involved in translational initiation. Located in cytosol. Part of eukaryotic translation initiation factor 4F complex. Expressed in several structures, including gonad. Human ortholog(s) of this gene implicated in late onset Parkinson's disease. Is an ortholog of human EIF4G3 (eukaryotic translat…
WBGene00023159	W06H8.5	16078.6	N.A.	Enriched in head mesodermal cell\; intestine\; and neurons based on RNA-seq and microarray studies. Is affected by several genes including cyc-1\; dys-1\; and nuo-6 based on microarray\; tiling array\; and RNA-seq studies. Is affected by eight chemicals including silicon dioxide nanoparticle\; Oligosaccharides\; and paraquat based on microarray and RNA-seq studies.
WBGene00019327	zip-2	16060.2	zip-2 encodes a bZIP transcription factor\; ZIP-2 activity is required for regulating one branch of the immune response pathway that responds to infection by virulent strains of the bacterial pathogen Pseudomonas aeruginosa\; specifically, ZIP-2 is required for inducing expression of a subset of infection response genes, including irg-1 and irg-2, and for full resistance to P. aeruginosa infectio…	Predicted to enable DNA-binding transcription factor activity, RNA polymerase II-specific and RNA polymerase II cis-regulatory region sequence-specific DNA binding activity. Involved in defense response to bacterium and positive regulation of macromolecule biosynthetic process. Predicted to be located in nucleus. Expressed in pharynx.
WBGene00002078	xpo-1	15941.7	xpo-1 encodes exportin-1, an importin-beta-like protein orthologous to Drosophila, vertebrate, and yeast exportin-1\/CRM1\; XPO-1 is predicted to function as a nuclear export receptor for proteins containing leucine-rich nuclear export signals\; in C. elegans, XPO-1 is essential for embryogenesis and larval development, and may also be required for normal body morphology and postembryonic growth …	Predicted to enable nuclear export signal receptor activity. Predicted to be involved in ribosomal large subunit export from nucleus and ribosomal small subunit export from nucleus. Predicted to be located in cytoplasm and nucleus. Human ortholog(s) of this gene implicated in gastrointestinal system cancer (multiple)\; lung adenocarcinoma\; and pancreatic cancer. Is an ortholog of human XPO1 (exp…
WBGene00017482	set-9	15936.5	set-9 encodes a large (1,655-residue) protein with a low-complexity N-terminal region, followed by a PHD-zinc finger and a SET domain\; SET-9 has no non-nematode orthologs, but has 96\% identity (1616\/1679 residues) to its paralog SET-26\; SET-9 is required for a normally short lifespan and low spontaneous mutation rate\; life extension by set-9(RNAi) requires DAF-16, indicating that SET-9 limit…	Predicted to enable histone methyltransferase activity and zinc ion binding activity. Involved in determination of adult lifespan. Predicted to be located in nucleus. Human ortholog(s) of this gene implicated in several diseases, including autosomal dominant intellectual developmental disorder 23\; esophagus squamous cell carcinoma\; and prostate cancer. Is an ortholog of human SETD5 (SET domain …
WBGene00016194	C28H8.3	15878.5	N.A.	Predicted to enable several functions, including ATP binding activity\; helicase activity\; and nucleic acid binding activity. Predicted to be located in cytoplasm. Is an ortholog of human DDX60 (DExD\/H-box helicase 60) and DDX60L (DExD\/H-box 60 like).
WBGene00004732	sax-7	15860.1	sax-7 encodes an ortholog of human L1CAM, and a paralog of lad-2\; L1CAM is a member of the group of highly conserved transmembrane cell adhesion receptor molecules which belong to the immunuglobulin superfamily\; SAX-7 is required for axon guidance, neurite outgrowth and maintenance of neuronal positioning through homophilic and heterophilic interactions\; sax-7 also affects germline development…	Enables ankyrin binding activity. Involved in several processes, including cell development\; establishment of mitotic spindle orientation\; and regulation of cell morphogenesis. Located in several cellular components, including axolemma\; lateral plasma membrane\; and somatodendritic compartment. Expressed in several structures, including gonad\; neurons\; pharynx\; somatic nervous system\; and …
WBGene00000366	cbp-1	15818.6	cbp-1 encodes a homolog of the mammalian transcriptional cofactors CBP (OMIM:600140) and p300 (E1A-BINDING PROTEIN, 300-KD\; OMIM:602700) that have been shown to possess histone acetyltransferase activity, and which, when mutated, lead to Rubinstein-Taybi syndrome (OMIM:180849) and colorectal cancer (OMIM:114500)\; at least one splicing form of CBP-1 exhibits histone acetyltransferase (HAT) activ…	Enables RNA polymerase II-specific DNA-binding transcription factor binding activity\; histone acetyltransferase activity\; and lysine N-acetyltransferase activity, acting on acetyl phosphate as donor. Involved in several processes, including intrinsic apoptotic signaling pathway in response to DNA damage\; positive regulation of transcription by RNA polymerase II\; and regulation of distal tip c…
WBGene00003759	nlp-21	15637.1	nlp-21 encodes nine predicted neuropeptide-like proteins\; in C. elegans, nlp-21 is part of the GGARAF neuropeptide family that also contains nlp-9\; nlp-21 is expressed in a variety of neurons, including AFD, five head neurons, the ventral nerve cord, one anterior pharyngeal neuron, and one tail neuron\; nlp-21 expression is also detected in the embryo and the intestine\; NLP-21 is tranported by…	Predicted to be involved in neuropeptide signaling pathway. Expressed in body wall musculature\; dorsal nerve cord\; intestine\; and neurons.
WBGene00007016	mdt-15	15551.5	mdt-15 encodes, by alternative splicing, two isoforms of a Mediator subunit orthologous to human MED15\; together with NHR-49 and SBP-1, MDT-15 is required for normal fat accumulation, for expression of fatty acid (FA) desaturase genes (fat-5, fat-6, and fat-7), for normal levels of mono- and polyunsaturated FAs (PUFAs), and for viability, fecundity, mobility, and normally long lifespan\; several…	Enables nuclear receptor binding activity and transcription coactivator activity. Involved in several processes, including determination of adult lifespan\; regulation of primary metabolic process\; and sequestering of triglyceride. Predicted to be located in nucleus. Expressed in head. Used to study chromosome 22q11.2 deletion syndrome, distal. Human ortholog(s) of this gene implicated in schizo…
WBGene00011480	enpl-1	15533	enpl-1 encodes the C. elegans ortholog of the Hsp90 family member and endoplasmic reticulum (ER) chaperone GRP94\/GP96\; loss of enpl-1 activity via RNAi results in slow growth, larval arrest, uncoordinated locomotion, and weak endocytosis defects\; in addition, loss of enpl-1 expression results in an increase in hsp-4 expression, revealing compensatory regulation amongst ER chaperones\; an enpl-…	Predicted to enable ATP binding activity\; ATP hydrolysis activity\; and unfolded protein binding activity. Predicted to be involved in ERAD pathway and protein folding. Predicted to be located in endoplasmic reticulum and perinuclear region of cytoplasm. Expressed in head\; neurons\; pharynx\; and vulva. Used to study cardiovascular system disease. Human ortholog(s) of this gene implicated in lu…
WBGene00003072	lrp-2	15528.2	N.A.	Involved in regulation of cell migration. Predicted to be located in plasma membrane. Expressed in tail.
WBGene00000868	cyb-3	15499	cyb-3 encodes one of four C. elegans cyclin B family members that is most closely related to the B3-type cyclins\; cyb-3 is required for a number of dynein-related mitotic processes and specifically for initiation of anaphase chromosome segregation\; cyb-3 is also required for completion of meiosis II and proper pronuclear migration, centrosome maturation, and pronuclear condensation in the ferti…	Enables cyclin-dependent protein serine\/threonine kinase regulator activity. Involved in several processes, including chromosome organization\; regulation of cell cycle\; and sexual reproduction. Acts upstream of or within nematode male tail tip morphogenesis. Located in cytoplasm and nucleus. Expressed in several structures, including EMS\; Psub2\; germ cell\; germ line\; and male gonad. Is an …
WBGene00004095	pqe-1	15496.3	pqe-1 produces through alternative splicing, proteins that contain a glutamineproline-rich domain and\/or an exonuclease domain\; the exonuclease domain is most similar to GOR proteins found in humans and gorillas and to the Saccharomyces cerevisiae Rex3p RNA exonuclease\; in a C. elegans model for huntingtin polyglutamine neurotoxicity, pqe-1 proteins protect the ASH sensory neurons from polyglu…	Predicted to enable exonuclease activity. Involved in negative regulation of gene expression. Located in nucleus. Expressed in ventral cord neurons. Is an ortholog of human REXO1 (RNA exonuclease 1 homolog).
WBGene00000677	col-103	15480.2	col-103 encodes a collagen.	Predicted to be a structural constituent of cuticle. Predicted to be part of collagen trimer.
WBGene00007030	epc-1	15455.5	N.A.	Predicted to be involved in regulation of transcription by RNA polymerase II. Predicted to be located in nucleus. Predicted to be part of piccolo histone acetyltransferase complex. Expressed in tail. Is an ortholog of human EPC1 (enhancer of polycomb homolog 1).
WBGene00001648	goa-1	15425.7	goa-1 encodes an ortholog of the heterotrimeric G protein alpha subunit Go (Go\/Gi class)\; GOA-1 activity is required for regulation of a number of behaviors, including locomotion, egg-laying, male mating, and olfactory-mediated behaviors\; GOA-1 activity is also required for asymmetric cell division in the early embryo\; goa-1 genetically interacts with the egl-30 pathway, and is expressed in a…	Enables several functions, including G protein activity\; G protein-coupled acetylcholine receptor activity\; and GTP binding activity. Involved in several processes, including detection of cold stimulus involved in thermoception\; negative regulation of cholinergic synaptic transmission\; and response to monoamine. Located in cell cortex. Expressed in several structures, including neurons\; non-…
WBGene00011240	mask-1	15415.6	The protein product of this gene is predicted to contain a glutamine\/asparagine (Q\/N)-rich ('prion') domain, by the algorithm of Michelitsch and Weissman (as of the WS77 release of WormBase, i.e., in wormpep77).	Predicted to enable RNA binding activity. Predicted to be located in cytoplasm. Expressed in head. Is an ortholog of human ANKHD1 (ankyrin repeat and KH domain containing 1)\; ANKHD1-EIF4EBP3 (ANKHD1-EIF4EBP3 readthrough)\; and ANKRD17 (ankyrin repeat domain 17).
WBGene00003404	mpz-1	15414.8	mpz-1 encodes a multi-PDZ domain scaffold protein\; mpz-1(RNAi) animals have reduced serotonin (5-HT)-stimulated egg laying unless truncated SER-1 is transgenically expressed in vulval muscle\; overexpressed MPZ-1 PDZ domain 10 also reduces SER-1-mediated egg laying\; the PDZ domain 10 of MPZ-1 binds the C-terminal PDZ-binding motif (ETFL) of the 5-HT receptor SER-1\; MPZ-1 also physically intera…	Enables GTPase activating protein binding activity. Predicted to be involved in positive regulation of insulin receptor signaling pathway. Located in axon. Expressed in body wall musculature\; nerve ring\; neurons\; and vulval muscle. Human ortholog(s) of this gene implicated in hydrocephalus. Is an ortholog of human MPDZ (multiple PDZ domain crumbs cell polarity complex component) and PATJ (PATJ…
WBGene00016650	ubr-4	15396.5	N.A.	Predicted to enable zinc ion binding activity. Predicted to be involved in DNA replication. Is an ortholog of human UBR4 (ubiquitin protein ligase E3 component n-recognin 4).
WBGene00004496	rps-27	15334.9	rps-27 encodes a small ribosomal subunit S27 protein.	Predicted to enable RNA binding activity. Predicted to be a structural constituent of ribosome. Predicted to be involved in ribosomal small subunit assembly. Predicted to be located in ribosome. Predicted to be part of cytosolic small ribosomal subunit. Human ortholog(s) of this gene implicated in Diamond-Blackfan anemia 17. Is an ortholog of human RPS27 (ribosomal protein S27).
WBGene00001999	hrpa-1	15322.4	hrp-1 encodes a putative heterogeneous nuclear ribonucleoprotein (hnRNP) required for mRNA surveillance, normally rapid growth, normally short lifespan, normally short body length, vulval development, DAF-18 function, fertility, and general viability\; HRP-1 has two N-terminal RRM domains and a low-complexity C-terminal domain\; HRP-1's homologs include HNRNPA0 (OMIM:609409), HNRNPA1 (HNRPA1\; OM…	Predicted to enable RNA binding activity. Involved in hemidesmosome assembly. Located in chromosome, telomeric region. Expressed in several structures, including germ line. Human ortholog(s) of this gene implicated in several diseases, including Alzheimer's disease\; amyotrophic lateral sclerosis type 20\; carcinoma (multiple)\; distal myopathy 3\; and inclusion body myopathy with early-onset Pag…
WBGene00002263	lea-1	15319.5	The lea-1 gene encodes a protein that is predicted to be hydrophilic and heat-resistant, and that might participate in anhydrobiosis.	Enables protein folding chaperone. Involved in hyperosmotic response\; response to desiccation\; and response to heat. Predicted to be located in extracellular region. Expressed in several structures, including excretory cell\; head\; intestine\; pharynx\; and tail neurons. Is an ortholog of human PLIN4 (perilipin 4).
WBGene00003934	pat-10	15302.3	pat-10 encodes body wall muscle troponin C, the calcium-binding component of the troponin complex of actin thin filaments\; PAT-10 is essential for muscle contraction and thus for completion of embryonic morphogenesis and elongation\; by homology, PAT-10 likely functions to regulate body wall muscle contraction in response to changes in intracellular calcium\; PAT-10 is expressed in body wall mus…	Enables troponin I binding activity. Involved in embryo development\; muscle contraction\; and skeletal muscle thin filament assembly. Located in contractile muscle fiber. Expressed in body wall musculature\; gonadal sheath cell\; rectal muscle\; and vulval muscle. Is an ortholog of human CALML6 (calmodulin like 6).
WBGene00004498	rps-29	15280.2	rps-29 encodes a small ribosomal subunit S29 protein\; by homology, RPS-29 is predicted to function in protein biosynthesis\; in C. elegans, RPS-29 activity is broadly required for embryonic and germline development, normal body coloration and morphology, normal postembryonic growth rates, and the overall health of the animal.	Predicted to enable zinc ion binding activity. Predicted to be a structural constituent of ribosome. Predicted to be involved in cytoplasmic translation. Predicted to be located in ribosome. Predicted to be part of cytosolic small ribosomal subunit. Human ortholog(s) of this gene implicated in Diamond-Blackfan anemia 13. Is an ortholog of human RPS29 (ribosomal protein S29).
WBGene00004440	rpl-26	15250.7	rpl-26 encodes a large ribosomal subunit L26 protein\; by homology, RPL-26 is predicted to function in protein biosynthesis\; in C. elegans, RPL-26 activity is required for embryonic and germline development and normal rates of postembryonic growth.	Predicted to enable RNA binding activity. Predicted to be a structural constituent of ribosome. Predicted to be involved in cytoplasmic translation and ribosomal large subunit biogenesis. Predicted to be located in ribosome. Predicted to be part of cytosolic large ribosomal subunit. Human ortholog(s) of this gene implicated in Diamond-Blackfan anemia 11. Is an ortholog of human RPL26 (ribosomal p…
WBGene00004456	rpl-37A	15246.5	rpl-43 encodes a large ribosomal subunit L37a protein.	Predicted to enable zinc ion binding activity. Predicted to be a structural constituent of ribosome. Predicted to be involved in translation. Predicted to be located in ribosome. Predicted to be part of cytosolic large ribosomal subunit. Is an ortholog of human RPL37A (ribosomal protein L37a).
WBGene00022037	acs-13	15238	N.A.	Predicted to enable long-chain fatty acid-CoA ligase activity. Predicted to be involved in long-chain fatty acid metabolic process. Predicted to be located in endoplasmic reticulum and membrane. Expressed in head. Human ortholog(s) of this gene implicated in acute myeloid leukemia\; congenital diarrhea\; and obesity. Is an ortholog of human ACSL1 (acyl-CoA synthetase long chain family member 1)\;…
WBGene00013489	col-42	15222	N.A.	Predicted to be a structural constituent of cuticle. Predicted to be located in membrane. Predicted to be part of collagen trimer.
WBGene00004751	sea-2	15206.2	sea-2 encodes a zinc finger protein\; SEA-2 is an autosomal signal element (ASE) that functions to interpret the X:A chromosomal ratio\; in addition, SEA-2 functions autonomously in the intestine to regulate adult lifespan and autonomously in seam cells to regulate larval developmental timing\; in regulating lifespan and developmental timing, SEA-2 functions as a post-transcriptional negative reg…	Enables double-stranded RNA binding activity and single-stranded RNA binding activity. Involved in several processes, including determination of adult lifespan\; regulation of gene expression\; and response to heat. Located in cytoplasm and nucleus. Expressed in intestinal cell\; nerve ring neurons\; neurons\; pharyngeal muscle cell\; and seam cell.
WBGene00004204	swsn-4	15201.5	swsn-4 (phasmid socket absent) gene encodes an ortholog of SWI2\/SNF2, a component of the SWI\/SNF complex that is conserved from yeast to mammals and that is involved in chromatin remodeling\; swsn-4 is probably required during mitosis of the T cells for asymmetric cell division.	Predicted to enable DNA binding activity\; chromatin binding activity\; and nucleosome array spacer activity. Involved in gonad development. Predicted to be located in chromatin and nucleus. Predicted to be part of SWI\/SNF complex. Expressed in several structures, including head\; hyp7 syncytium\; tail\; ventral cord neurons\; and vulval cell. Used to study alcohol use disorder and cancer. Human…
WBGene00021035	W05F2.3	15118.7	N.A.	Predicted to be located in membrane. Expressed in germ line.
WBGene00001922	his-48	15088.5	his-48 encodes an H2B histone\; by homology, HIS-48 is predicted to function as a nucleosome component required for packaging of DNA into chromatin\; his-48 is a replication-dependent histone locus that resides in a histone gene-rich region on chromosome IV.	Predicted to enable DNA binding activity. Involved in innate immune response. Predicted to be located in chromosome and nucleus. Predicted to be part of nucleosome. Expressed in gonad. Is an ortholog of several human genes including H2BC3 (H2B clustered histone 3)\; H2BC5 (H2B clustered histone 5)\; and H2BC8 (H2B clustered histone 8).
WBGene00006840	unc-116	15088.4	unc-116 encodes a kinesin-1 heavy chain ortholog\; UNC-116 is predicted to function as an anterograde microtubule-based motor and its activity is required for transport and localization of synaptic vesicle components and thus for normal locomotion and larval development\; in addition, unc-116 is required for normal early translocation of the meiotic spindle to the oocyte cortex, cortical position…	Enables plus-end-directed microtubule motor activity. Involved in several processes, including establishment of organelle localization\; polar body extrusion after meiotic divisions\; and positive regulation of cell projection organization. Located in several cellular components, including neuron projection\; nuclear envelope\; and synapse. Part of kinesin I complex. Expressed in several structur…
WBGene00001607	gln-6	15063.8	N.A.	Predicted to enable glutamine synthetase activity. Predicted to be involved in glutamine biosynthetic process. Predicted to be located in cytoplasm. Expressed in anterior gonad arm and germ line. Human ortholog(s) of this gene implicated in several diseases, including Alzheimer's disease\; Huntington's disease\; congenital glutamine deficiency\; and epilepsy (multiple). Is an ortholog of human GL…
WBGene00019940	npp-21	15062.4	N.A.	Predicted to be a structural constituent of nuclear pore. Predicted to be involved in mRNA export from nucleus and regulation of mitotic spindle assembly. Predicted to be part of nuclear pore. Human ortholog(s) of this gene implicated in autosomal recessive intellectual developmental disorder. Is an ortholog of human TPR (translocated promoter region, nuclear basket protein).
WBGene00004316	rbf-1	15003.8	rbf-1 encodes the sole C. elegans rabphilin homolog\; rbf-1 activity is required for normal basal rates of locomotion (in the absence of stimulation) and, in combination with SNARE components ric-4, snb-1, and unc-64, for normal rates of both basal and stimulated locomotion\; RBF-1 is expressed in the nerve ring and in the dorsal and ventral nerve cords and colocalizes with synaptic vesicle marke…	Predicted to enable zinc ion binding activity. Involved in dense core granule exocytosis and positive regulation of locomotion. Located in synaptic vesicle. Expressed in dorsal nerve cord\; nerve ring\; neurons\; and ventral nerve cord. Is an ortholog of human RPH3A (rabphilin 3A).
WBGene00006527	tax-6	14975.2	tax-6 encodes an ortholog of calcineurin A that is required for inhibition and adaptation of several sensory neurons and for the normal regulation of egg-laying by serotonin\; TAX-6 stimulates transcription of rcn-1, and binds RCN-1 protein if free Ca[2+] is present\; in general, calcineurin positively regulates calcium-dependent signaling\; tax-6 loss-of-function mutants exhibit an extended life…	Enables calcium ion binding activity and calmodulin-dependent protein phosphatase activity. Involved in several processes, including determination of adult lifespan\; male mating behavior\; and response to temperature stimulus. Located in several cellular components, including neuronal cell body\; nucleus\; and plasma membrane bounded cell projection. Expressed in several structures, including ge…
WBGene00004447	rpl-35A	14953.2	rpl-33 encodes a large ribosomal subunit L35a protein.	Predicted to be a structural constituent of ribosome. Predicted to be involved in cytoplasmic translation and ribosomal large subunit biogenesis. Predicted to be located in ribosome. Predicted to be part of cytosolic large ribosomal subunit. Human ortholog(s) of this gene implicated in Diamond-Blackfan anemia 5 and glioblastoma. Is an ortholog of human RPL35A (ribosomal protein L35a).
WBGene00000833	cts-1	14934.8	cts-1 encodes a citrate synthase\; by homology, CTS-1 is predicted to function in the citric acid cycle to catalyze the formation of citrate from oxaloacetate and acetyl-CoA\; cts-1 is required for embryonic development.	Predicted to enable citrate (Si)-synthase activity. Predicted to be involved in carbohydrate metabolic process and tricarboxylic acid cycle. Located in mitochondrion. Expressed in anal depressor muscle and ventral cord neurons. Human ortholog(s) of this gene implicated in dilated cardiomyopathy and hypertrophic cardiomyopathy. Is an ortholog of human CS (citrate synthase).
WBGene00003026	lin-41	14934.7	lin-41 encodes a novel RBCC (Ring finger-B box-Coiled coil) protein that is a member of the NHL (NCL-1, HT2A, and LIN-41) family of proteins\; lin-41 is a heterochronic gene required for temporal control of specific postembryonic cell fates\; lin-41 is also required for proper male tail morphogenesis\; lin-41 translation is negatively regulated during L4 and adult stages by the let-7 microRNA tha…	Enables mRNA binding activity and translation repressor activity. Involved in several processes, including negative regulation of gene expression\; nematode male tail tip morphogenesis\; and regulation of developmental process. Acts upstream of or within positive regulation of transcription by RNA polymerase II. Located in cytoplasm and ribonucleoprotein granule. Expressed in several structures, …
WBGene00006921	vha-12	14902.3	vha-12 encodes an ortholog of subunit B of the cytoplasmic (V1) domainof vacuolar proton-translocating ATPase (V-ATPase)\; VHA-12 isorthologous to human ATP6V1B1 (OMIM:192132, mutated in distal renaltubular acidosis with progressive sensorineural deafness) and ATP6V1B2(OMIM:606939)\; VHA-12 and TAG-300\/Y110A7A.12 are co-orthologs\; VHA-17,like VHA-1 and VHA-12, antagonizes EFF-1-mediated cell fu…	Predicted to enable proton-transporting ATPase activity, rotational mechanism. Involved in several processes, including positive regulation of neurotransmitter secretion\; regulation of intracellular pH\; and regulation of syncytium formation by plasma membrane fusion. Predicted to be part of proton-transporting V-type ATPase, V1 domain. Expressed in excretory pore\; hypodermal cell\; muscle cell…
WBGene00002010	hsp-6	14798.5	hsp-6 encodes a nuclear-encoded mitochondrion-specific chaperone that is a member of the DnaK\/Hsp70 superfamily of molecular chaperones\; hsp-6 is involved in the mitochondrial unfolded protein response, as hsp-6 expression, normally broadly detected from the L1 larval through adult stages of development, is greatly increased in response to treatments that disrupt mitochondrial protein handling\…	Predicted to enable ATP hydrolysis activity\; heat shock protein binding activity\; and protein folding chaperone. Involved in mitochondrial unfolded protein response. Located in mitochondrion. Expressed in muscle cell. Human ortholog(s) of this gene implicated in Alzheimer's disease\; Parkinson's disease\; autosomal dominant sideroblastic anemia 4\; and rheumatoid arthritis. Is an ortholog of hu…
WBGene00023497	lin-15B	14724	lin-15B encodes a novel protein that contains a THAP domain, a zinc-coordinating, site-specific DNA-binding domain\; lin-15B was first identified as a class B synMuv gene that acts redundantly with lin-15A to negatively regulate the outcome of Ras signaling during vulval cell fate specification\; subsequently, lin-15B has been shown to also negatively regulate progression through the G1 phase of …	Predicted to enable DNA binding activity and zinc ion binding activity. Involved in negative regulation of Ras protein signal transduction\; negative regulation of vulval development\; and regulation of cell fate specification. Predicted to be located in nucleus. Expressed in several structures, including anterior gonad arm\; oocyte\; and somatic cell.
WBGene00017317	attf-2	14716.4	N.A.	Predicted to enable DNA binding activity.
WBGene00009342	fasn-1	14686.9	fasn-1 encodes a fatty acid synthase, orthologous to human FASN (OMIM:600212)\; CEP-1 is required for fully normal fasn-1 expression in vivo\; CEP-1 drives transcription of luciferase reporters whose promoters contains either of two putative CEP-1 binding sites (FAS-T1 and FAS-T2) found in the fasn-1 gene, and this activity is partially lost bymutation of conserved CEP-1 residues (R298 or H310)\;…	Predicted to enable fatty acid synthase activity. Predicted to be involved in fatty acid biosynthetic process. Expressed in excretory duct\; hermaphrodite gonad\; hypodermis\; intestine\; and neurons. Used to study muscular disease. Human ortholog(s) of this gene implicated in colorectal cancer. Is an ortholog of human FASN (fatty acid synthase).
WBGene00011522	srap-1	14676.1	N.A.	Expressed in cuticle\; nervous system\; seam cell\; syncytium\; and vulva.
WBGene00001934	his-60	14663.4	his-60 encodes an H4 histone\; by homology, HIS-60 is predicted to function as a nucleosome component required for packaging of DNA into chromatin\; his-60 expression is detected in early embryos, beginning at the 28-cell stage and continuing through the comma stage (early morphogenesis)\; his-60 is a replication-dependent histone locus that resides in a histone gene-rich region on chromosome IV.	Predicted to enable DNA binding activity and protein heterodimerization activity. Predicted to be a structural constituent of chromatin. Is an ortholog of several human genes including H4C1 (H4 clustered histone 1)\; H4C4 (H4 clustered histone 4)\; and H4C9 (H4 clustered histone 9).
WBGene00000675	col-101	14659.3	col-101 encodes a cuticle collagen\; loss of col-101 via large-scale RNAi screens results in animals that are pale and slow growing.	Predicted to be a structural constituent of cuticle. Predicted to be located in membrane. Predicted to be part of collagen trimer.
WBGene00016250	hsp-110	14643.3	C30C11.4 encodes a member of the Hsp70 family of heat shock proteins\; loss of C30C11.4 activity via large-scale RNAi screens results in a variety of defects including embryonic and larval lethality, slow growth rates, and locomotory and morphological defects\; in addition loss of C30C11.4 has been reported to result in a small but reproducible reduction in adult lifespan in otherwise long-lived …	Predicted to enable adenyl-nucleotide exchange factor activity. Involved in determination of adult lifespan\; protein folding\; and response to topologically incorrect protein. Predicted to be located in cytosol and nucleus. Human ortholog(s) of this gene implicated in several diseases, including Chagas disease\; autoimmune disease (multiple)\; and type 2 diabetes mellitus. Is an ortholog of huma…
WBGene00004984	spn-4	14622.5	spn-4 encodes a protein containing an RNP-type RNA-binding domain\; SPN-4 is required for rotation, but not polarization, of the mitotic spindle in the P1 blastomere of the two-cell stage embryo\; SPN-4 is also required for mesectoderm and mesendoderm formation in conjunction with proper localization of maternal cell-fate determinants such as SKN-1\; in addition, SPN-4 binds the glp-1 3' UTR and …	Predicted to enable mRNA binding activity. Predicted to be involved in nervous system development and regulation of alternative mRNA splicing, via spliceosome. Located in P granule. Expressed in several structures, including Psub4\; Z2\; Z3\; germ line\; and oocyte.
WBGene00002192	kin-4	14564.4	N.A.	Predicted to enable protein serine\/threonine kinase activity. Predicted to be involved in intracellular signal transduction. Predicted to be located in cytoplasm. Expressed in head neurons\; intestine\; and tail neurons. Human ortholog(s) of this gene implicated in developmental and epileptic encephalopathy 108\; female breast cancer\; and mega-corpus-callosum syndrome with cerebellar hypoplasia…
WBGene00009126	pyk-1	14516.8	pyk-1 encodes one of two C. elegans pyruvate kinases\; large-scale RNAi experiments indicate that pyk-1 is essential for embryonic development and specifically, for normal cortical activity in the AB blastomere\; large-scale expression studies show that pyk-1 is expressed in body wall muscle in larvae and in body wall and vulval muscle, as well as in the reproductive system, in adults.	Predicted to enable pyruvate kinase activity. Predicted to be involved in glycolytic process. Predicted to be located in cytoplasm. Human ortholog(s) of this gene implicated in several diseases, including Gaucher's disease\; congenital nonspherocytic hemolytic anemia 2\; and type 2 diabetes mellitus. Is an ortholog of human PKM (pyruvate kinase M1\/2).
WBGene00000123	ama-1	14516.4	ama-1 encodes the large subunit of RNA polymerase II required for mRNA transcription\; AMA-1 is essential for proper embryonic development, particularly for the early division and migration of the endodermal precursor (E) cells that initiate gastrulation\; AMA-1 is expressed ubiquitously in the developing embryo until the 550-cell stage.	Contributes to DNA-directed 5'-3' RNA polymerase activity. Involved in embryo development\; gastrulation\; and mRNA transcription by RNA polymerase II. Located in euchromatin and nuclear body. Is an ortholog of human POLR2A (RNA polymerase II subunit A).
WBGene00009035	gfat-2	14497.2	gfat-2 encodes a glucosamine--fructose-6-phosphate aminotransferase (EC:2.6.1.16, also known as glutamine-fructose-6-phosphate transaminase), paralogous to GFAT-1\; GFAT-2 is predicted to catalyze the first, and rate-limiting, step of the hexosamine pathway in which glucosamine-6-phosphate is synthesized from L-glutamine and fructose-6-phosphate and ultimately converted to UDP-N-acetylglucosamine…	Predicted to enable glutamine-fructose-6-phosphate transaminase (isomerizing) activity. Predicted to be involved in UDP-N-acetylglucosamine metabolic process\; fructose 6-phosphate metabolic process\; and protein N-linked glycosylation. Human ortholog(s) of this gene implicated in congenital myasthenic syndrome 12\; obesity\; and type 2 diabetes mellitus. Is an ortholog of human GFPT1 (glutamine-…
WBGene00002637	let-418	14432.8	The let-418 gene encodes a homolog of Mi-2\/CHD3, a component of the nucleosome remodeling and histone deacetylase (NURD) complex\; LET-418 is similar to DNA helicases, homologous to human AIRE (OMIM:607358, mutated in autoimmune polyendocrinopathy syndrome), and paralogous to CHD-3\; with MEP-1, LET-418 is required to repress germline-specific genes in somatic cells, and also negatively regulate…	Enables RNA polymerase II-specific DNA-binding transcription factor binding activity. Contributes to RNA polymerase II transcription regulatory region sequence-specific DNA binding activity. Involved in embryonic digestive tract morphogenesis\; negative regulation of transcription by RNA polymerase II\; and negative regulation of vulval development. Part of RNA polymerase II transcription repress…
WBGene00044643	nssp-13	14296.5	N.A.	Predicted to be involved in neuropeptide signaling pathway.
WBGene00003162	mdh-2	14292.2	mdh-2 encodes a homolog of malate dehydrogenase that is predicted to be mitochondrial.	Enables L-malate dehydrogenase (NAD+) activity. Involved in malate metabolic process. Located in mitochondrion. Used to study hyperglycemia. Human ortholog(s) of this gene implicated in developmental and epileptic encephalopathy 51. Is an ortholog of human MDH2 (malate dehydrogenase 2).
WBGene00004434	rpl-22	14290.9	rpl-22 encodes a large ribosomal subunit L22 protein\; by homology, RPL-22 is predicted to function in protein biosynthesis\; in C. elegans, RPL-22 activity is broadly required for embryonic and germline development, as well as normal body coloration, morphology, and postembryonic growth rates.	Predicted to enable RNA binding activity. Predicted to be a structural constituent of ribosome. Predicted to be involved in cytoplasmic translation. Predicted to be located in ribosome. Predicted to be part of ribonucleoprotein complex. Is an ortholog of human RPL22 (ribosomal protein L22).
WBGene00018846	eef-1B.1	14287.7	N.A.	Predicted to enable guanyl-nucleotide exchange factor activity. Predicted to be involved in translational elongation. Predicted to be located in cytosol. Predicted to be part of eukaryotic translation elongation factor 1 complex. Is an ortholog of human EEF1B2 (eukaryotic translation elongation factor 1 beta 2).
WBGene00004110	pqn-20	14251.1	The protein product of this gene is predicted to contain a glutamine\/asparagine (Q\/N)-rich ('prion') domain, by the algorithm of Michelitsch and Weissman (as of the WS77 release of WormBase, i.e., in wormpep77).	Enriched in AVK\; OLL\; PVD\; germ line\; and oocyte based on microarray and RNA-seq studies. Is affected by several genes including cyc-1\; swsn-2.2\; and nuo-6 based on microarray\; RNA-seq\; tiling array\; and proteomic studies. Is affected by nine chemicals including rotenone\; D-glucose\; and Alovudine based on RNA-seq and microarray studies.
WBGene00004980	spk-1	14208.2	spk-1 encodes a serine\/threonine kinase orthologous to the highly conserved serine\/arginine-rich protein kinases (SRPKs) that phosphorylate SR proteins, essential components of the pre-mRNA splicing machinery\; SPK-1, required for embryogenesis and germline development, can directly bind and phosphorylate RSP-3 (CeSF2\/ASF), an SR splicing factor homolog\; SPK-1 is expressed predominantly in th…	Enables protein serine\/threonine kinase activity. Involved in embryo development and protein phosphorylation. Predicted to be located in cytoplasm and nucleus. Expressed in several structures, including gonad and tail. Is an ortholog of human SRPK1 (SRSF protein kinase 1)\; SRPK2 (SRSF protein kinase 2)\; and SRPK3 (SRSF protein kinase 3).
WBGene00002113	ins-30	14166.3	ins-30 encodes an insulin-like peptide.	Predicted to enable hormone activity. Predicted to be involved in signal transduction. Predicted to be located in extracellular region. Expressed in head muscle\; intestine\; neurons\; and ventral nerve cord.
WBGene00001209	egl-45	14154.4	N.A.	Predicted to enable mRNA binding activity and translation regulator activity. Predicted to contribute to translation initiation factor activity. Involved in egg-laying behavior and embryo development. Predicted to be located in cytoplasm. Predicted to be part of eukaryotic translation initiation factor 3 complex, eIF3e\; eukaryotic translation initiation factor 3 complex, eIF3m\; and multi-eIF co…
WBGene00044689	arid-1	14125.5	N.A.	Predicted to enable transcription cis-regulatory region binding activity. Acts upstream of or within ERAD pathway and defense response to other organism. Predicted to be located in nucleus. Predicted to be part of transcription repressor complex. Is an ortholog of human ARID4A (AT-rich interaction domain 4A).
WBGene00006805	unc-73	14083.3	unc-73 encodes a guanine nucleotide exchange factor (GNEF) similar to the Trio protein\; UNC-73 is required for vulval morphogenesis, for the migration of QL, QR, CAN, and hypodermal P cells, the commissure outgrowth of D type motoneurons, and amphid axon outgrowth\; UNC-73 has GNEF activity for both CED-10 and MIG-2 in vitro\; the requirement for UNC-73 in P cell migration can be suppressed by t…	Enables guanyl-nucleotide exchange factor activity and small GTPase binding activity. Involved in several processes, including generation of neurons\; modulation of chemical synaptic transmission\; and regulation of neuron projection development. Located in axon\; cytoplasm\; and muscle cell projection. Expressed in several structures, including egg-laying apparatus\; hermaphrodite gonad\; lumbar…
WBGene00002027	hsr-9	14081.3	hsr-9 encodes a protein containing a BRCT (BRCA 1 C terminus) domain that is found in proteins that regulate the cell cycle checkpoint in response to DNA damage\; HSR-9 activity is required for a normal response to DNA damage caused by gamma-irradiation\; loss of HSR-9 function via RNA-mediated interference after gamma-irradiation results in defects in mitotic cell cycle arrest, reduction of apop…	Predicted to enable histone binding activity. Predicted to be involved in DNA damage checkpoint signaling and positive regulation of transcription by RNA polymerase II. Located in nucleus. Expressed in germ cell. Human ortholog(s) of this gene implicated in pulmonary hypertension. Is an ortholog of human TP53BP1 (tumor protein p53 binding protein 1).
WBGene00022042	icd-2	14022	N.A.	Predicted to enable unfolded protein binding activity. Predicted to be involved in protein targeting to membrane. Predicted to be located in cytoplasm. Predicted to be part of nascent polypeptide-associated complex. Expressed in intestinal cell. Is an ortholog of human NACA4P (NACA family member 4, pseudogene).
WBGene00001829	hcp-1	14007.4	hcp-1 encodes a homolog of the mammalian centromere protein-F (CENP-F) and is involved in mitotic chromosome segregation\; hcp-1 functions in an ordered pathway consisting of two other CENP proteins encoded by hcp-3 and hcp-4 to control assembly of the kinetochore\; hcp-1 localization to the kinetochore is dependent on hcp-3 and hcp-4.	Involved in several processes, including chromosome segregation\; kinetochore assembly\; and meiotic spindle organization. Located in kinetochore\; nucleus\; and spindle. Expressed in AB and Psub1.
WBGene00004336	ret-1	13993.6	N.A.	Located in endomembrane system. Expressed in several structures, including gonad and nervous system. Human ortholog(s) of this gene implicated in hereditary spastic paraplegia 12. Is an ortholog of human RTN3 (reticulon 3).
WBGene00001259	emb-5	13988	emb-5 encodes the C. elegans ortholog of the Spt6 family of RNA polymerase II transcription elongation factors\; first identified in screens for temperature-sensitive embryonic lethal mutations, emb-5 is required for the correct timing of the second E (endoderm)-cell division in the early embryo and thus, for normal embryonic gastrulation\; in addition, emb-5 activity is required postembryonicall…	Predicted to enable histone binding activity and nucleosome binding activity. Predicted to be involved in nucleosome organization and transcription elongation by RNA polymerase II. Predicted to be located in nucleus. Predicted to be part of transcription elongation factor complex. Expressed in tail. Is an ortholog of human SUPT6H (SPT6 homolog, histone chaperone and transcription elongation facto…
WBGene00006699	uba-1	13981	uba-1 encodes the only known ubiquitin-activating enzyme in C. elegans and is orthologous to Saccharomyces cerevisiae UBA1 and human UBE1\; UBA-1 is essential for embryogenesis and larval development and is required for proper formation of the male tail, sperm fertility, proper body size, meiotic progression in the embryo and germline development\; by homology, UBA-1 is predicted to function in a…	Predicted to enable ubiquitin activating enzyme activity. Involved in several processes, including developmental process involved in reproduction\; negative regulation of transcription by RNA polymerase II\; and programmed cell death involved in cell development. Located in nucleus. Expressed in anterior hypodermis\; germ line\; midbody\; neurons\; and pharynx. Human ortholog(s) of this gene impl…
WBGene00004454	rpl-36A	13979.1	N.A.	Predicted to be a structural constituent of ribosome. Predicted to be involved in translation. Predicted to be located in ribosome. Predicted to be part of cytosolic large ribosomal subunit. Is an ortholog of human RPL36A (ribosomal protein L36a) and RPL36AL (ribosomal protein L36a like).
WBGene00007042	pbrm-1	13958.5	pbrm-1 encodes an ortholog of human polybromo 1 (OMIM:606083) and Saccharomyces cerevisiae RSC1 and RSC2\; by homology, PBRM-1 is predicted to function in chromatin remodeling and transcriptional regulation\; pbrm-1 genetically interacts with two or more components of the EGF\/RAS signaling pathway, and is required for such signaling in vulval development\; pbrm-1 also interacts genetically with …	Predicted to enable chromatin binding activity. Involved in gonad development. Predicted to be located in chromosome and nucleus. Predicted to be part of RSC-type complex and SWI\/SNF complex. Expressed in head\; somatic cell\; tail\; and tail precursor cell. Used to study alcohol use disorder. Human ortholog(s) of this gene implicated in Crohn's disease\; carcinoma (multiple)\; and colorectal ca…
WBGene00001564	icl-1	13927.7	icl-1 encodes a predicted isocitrate lyase\/malate synthase, an enzyme known to function in the glyoxylate cycle\; ICL-1 was identified in a screen for proteins that interact with GEX-3, a homolog of human HEM-2 which is required for embryonic development\; ICL-1 appears to act downstream of DAF-16 to influence lifespan.	Predicted to enable isocitrate lyase activity and malate synthase activity. Involved in determination of adult lifespan. Located in mitochondrion. Expressed in hypodermal cell and pharynx.
WBGene00006579	tlk-1	13908.2	tlk-1 encodes, through alternative splicing, two isoforms of a Tousled-class serine\/threonine protein kinase\; TLK-1A\/B are orthologous to Tousled from A. thaliana\; tlk-1(RNAi) embryos have, compared to normal embryos, reduced phosphorylation of the RNA polymerase II C-terminal domain at Serine-2 and methylation of histone H3 at Lysine-36 (posttranslational modifications associated with transc…	Enables protein kinase activity. Involved in regulation of transcription by RNA polymerase II. Located in chromatin and nucleus. Expressed in germ line\; head\; posterior lateral ganglion\; somatic cell\; and somatic gonad. Human ortholog(s) of this gene implicated in autosomal dominant intellectual developmental disorder. Is an ortholog of human TLK2 (tousled like kinase 2).
WBGene00004485	rps-16	13900.6	rps-16 encodes a small ribosomal subunit S16 protein.	Predicted to enable RNA binding activity. Predicted to be a structural constituent of ribosome. Predicted to be involved in maturation of SSU-rRNA from tricistronic rRNA transcript (SSU-rRNA, 5.8S rRNA, LSU-rRNA). Predicted to be located in ribosome. Predicted to be part of cytosolic small ribosomal subunit. Is an ortholog of human RPS16 (ribosomal protein S16).
WBGene00020679	ogdh-1	13896.5	N.A.	Predicted to enable oxoglutarate dehydrogenase (succinyl-transferring) activity. Involved in protein folding. Located in mitochondrion. Expressed in head and tail. Human ortholog(s) of this gene implicated in Yoon-Bellen neurodevelopmental syndrome and oxoglutarate dehydrogenase deficiency. Is an ortholog of human OGDH (oxoglutarate dehydrogenase).
WBGene00013859	ZC247.1	13849.8	N.A.	Predicted to enable phosphatidylethanolamine binding activity and ubiquitin protein ligase binding activity. Predicted to be involved in cellular response to nitrogen starvation and macroautophagy. Predicted to be located in autophagosome membrane.
WBGene00000907	daf-11	13848.1	daf-11 encodes a transmembrane guanylate cyclase\; daf-11 activity is required for a number of processes dependent upon normal chemosensory function, including dauer formation and recovery and chemotaxis to both volatile and non-volatile odorants\; daf-11 is also required for axon formation\; daf-11 acts together with daf-21 to regulate chemosensory function and genetically upstream of daf-12 wit…	Predicted to enable guanylate cyclase activity and peptide receptor activity. Involved in several processes, including cellular response to cGMP\; determination of adult lifespan\; and signal transduction. Located in dendrite\; neuronal cell body\; and non-motile cilium. Expressed in ADLL\; ADLR\; ASHL\; and ASHR.
WBGene00000496	chs-1	13816.3	chs-1 encodes a chitin synthase, paralogous to CHS-2\; chs-1 is requiredfor embryonic chitin synthesis, eggshell synthesis and osmoticintegrity, error-free chromosomal segregation during meiosis, polar bodyextrusion, association of the sperm pronucleus\/centrosome complex (SPCC)with the early embryonic cortex, localization of PAR-2 in early embryos,posterior localization of P granules or PIE-1, a…	Predicted to enable chitin synthase activity. Involved in chitin biosynthetic process\; eggshell formation\; and positive regulation of protein localization to cell cortex. Located in cell cortex and plasma membrane. Expressed in Psub1.
WBGene00003848	odr-1	13775	odr-1 encodes a putative guanylyl cyclase\; odr-1 activity is required for normal responses to all AWC-sensed odorants\; ODR-1 is expressed in chemosensory neurons including AWC, where it localizes to the flattened ciliated endings.	Predicted to enable ATP binding activity\; guanylate cyclase activity\; and protein kinase activity. Predicted to be involved in cGMP biosynthetic process\; intracellular signal transduction\; and protein phosphorylation. Predicted to be located in membrane. Expressed in I1 neuron and amphid neurons. Human ortholog(s) of this gene implicated in congenital diarrhea 6. Is an ortholog of human GUCY2…
WBGene00004444	rpl-30	13758.3	rpl-30 encodes a large ribosomal subunit L30 protein\; by homology, RPL-30 is predicted to function in protein biosynthesis\; in C. elegans, loss of rpl-30 function via RNA-mediated interference (RNAi) does not result in any obvious abnormalities.	Predicted to enable RNA binding activity. Predicted to be a structural constituent of ribosome. Involved in determination of adult lifespan. Predicted to be located in ribosome. Predicted to be part of cytosolic large ribosomal subunit. Human ortholog(s) of this gene implicated in herpes simplex. Is an ortholog of human RPL30 (ribosomal protein L30).
WBGene00000931	dao-5	13754.7	dao-5 encodes a predicted nucleolar phosphoprotein related to Saccharomyces cerevisiae SRP40 and the vertebrate Nopp140 proteins that may play a role in rRNA gene transcription and nucleolar structural organization\; dao-5 expression is negatively regulated by the DAF-2\/insulin-like receptor and positively regulated by the DAF-16\/fork-head transcription factor, suggesting that dao-5 may be invo…	Enables RNA polymerase I core binding activity and rDNA binding activity. Involved in several processes, including determination of adult lifespan\; insulin receptor signaling pathway\; and nucleolar large rRNA transcription by RNA polymerase I. Located in nucleolus and nucleoplasm. Expressed in germline precursor cell\; gonadal sheath cell\; hypodermis\; and somatic cell. Is an ortholog of human…
WBGene00011474	aldo-1	13640.2	aldo-1 is orthologous to the human gene ALDOLASE A, FRUCTOSE-BISPHOSPHATE (ALDOA\; OMIM:103850), which when mutated leads to aldolase A deficiency.	Enables fructose-bisphosphate aldolase activity and identical protein binding activity. Predicted to be involved in fructose 1,6-bisphosphate metabolic process and glycolytic process. Located in endoplasmic reticulum\; sarcomere\; and striated muscle dense body. Expressed in gonad\; intestinal muscle\; and spermathecal-uterine valve cell. Human ortholog(s) of this gene implicated in autoimmune di…
WBGene00017075	nap-1	13630.9	D2096.8 encodes a protein related in sequence to the conserved NAP (Nucleosome Assembly Protein) family of proteins involved in chromatin remodeling\; loss of D2096.8 activity in wild-type and various mutant backgrounds suggests that, in C. elegans, the product of D2096.8 is required for proper transcriptional regulation that affects a number of biological processes including embryonic and larval…	Enables RNA polymerase II-specific DNA-binding transcription factor binding activity and cholesterol binding activity. Predicted to be involved in nucleosome assembly. Located in cytoplasm and nucleus. Human ortholog(s) of this gene implicated in appendiceal neoplasm\; hepatoblastoma\; and pancreatic cancer. Is an ortholog of human NAP1L1 (nucleosome assembly protein 1 like 1)\; NAP1L2 (nucleosom…
WBGene00016493	rplp-2.1	13600.4	N.A.	Predicted to be a structural constituent of ribosome. Predicted to be involved in cytoplasmic translational elongation. Predicted to be located in cytosolic ribosome. Predicted to be part of cytosolic large ribosomal subunit. Is an ortholog of human RPLP2 (ribosomal protein lateral stalk subunit P2).
WBGene00001080	dpy-21	13586.8	dpy-21 encodes a novel, conserved protein with a proline-rich N terminus\; dpy-21 affects RNA levels of X-linked dosage-compensated genes, body length in hermaphrodites, and fertility and male tail development in males\; DPY-21 interacts in vivo with DPY-27 and SDC-3, members of the dosage compensation complex, and like members of the dosage compensation complex, is diffusely localized in nuclei …	Enables histone H4K20 demethylase activity. Predicted to be involved in chromatin remodeling. Located in X chromosome. Is an ortholog of human RSBN1L (round spermatid basic protein 1 like).
WBGene00004486	rps-17	13560.2	rps-17 encodes a small ribosomal subunit S17 protein.	Predicted to be a structural constituent of ribosome. Predicted to be involved in translation. Predicted to be located in cytosol and ribosome. Predicted to be part of ribonucleoprotein complex. Human ortholog(s) of this gene implicated in Diamond-Blackfan anemia 4. Is an ortholog of human RPS17 (ribosomal protein S17).
WBGene00004495	rps-26	13541.6	rps-26 encodes a small ribosomal subunit S26 protein\; by homology, RPS-26 is predicted to function in protein biosynthesis\; in C. elegans, RPS-26 activity is required for embryonic, larval, and germline development, as well as normal locomotion and body morphology.	Predicted to enable mRNA binding activity. Predicted to be a structural constituent of ribosome. Involved in determination of adult lifespan. Predicted to be located in cytoplasmic side of rough endoplasmic reticulum membrane and ribosome. Predicted to be part of cytosolic small ribosomal subunit. Human ortholog(s) of this gene implicated in Diamond-Blackfan anemia 10. Is an ortholog of human RPS…
WBGene00000041	aco-2	13514.5	aco-2 encodes an aconitase homolog that is required for embryonic viability, fertility, locomotion, and vulval morphogenesis, and perhaps for normal lifespan.	Predicted to enable 4 iron, 4 sulfur cluster binding activity and aconitate hydratase activity. Predicted to be involved in tricarboxylic acid cycle. Located in mitochondrion. Expressed widely. Human ortholog(s) of this gene implicated in infantile cerebellar-retinal degeneration and optic atrophy 9. Is an ortholog of human ACO2 (aconitase 2).
WBGene00002083	inf-1	13514.5	inf-1 encodes a protein with high similarity to eukaryotic initiation factor 4A.	Predicted to enable translation initiation factor activity. Predicted to be involved in cytoplasmic translational initiation. Predicted to be located in cytoplasmic stress granule. Expressed in germ line\; intestine\; and neurons. Human ortholog(s) of this gene implicated in neurodevelopmental disorder with hypotonia and speech delay. Is an ortholog of human EIF4A1 (eukaryotic translation initiat…
WBGene00018491	mdh-1	13460.4	mdh-1 encodes a malate dehydrogenase\; by homology, MDH-1 is predicted to function to reversibly catalyze the formation of oxaloacetate from malate.	Enables L-malate dehydrogenase (NAD+) activity. Involved in malate metabolic process. Predicted to be located in cytosol. Human ortholog(s) of this gene implicated in developmental and epileptic encephalopathy 88. Is an ortholog of human MDH1 (malate dehydrogenase 1).
WBGene00011304	mnk-1	13454.7	mnk-1 encodes the C. elegans ortholog of the Mnk MAP kinase-interacting kinase	Predicted to enable calcium-dependent protein serine\/threonine kinase activity\; calcium\/calmodulin-dependent protein kinase activity\; and calmodulin binding activity. Involved in behavioral response to nicotine\; determination of adult lifespan\; and regulation of protein deneddylation. Located in nucleus. Expressed in body wall musculature\; intestine\; pharyngeal muscle cell\; pharynx\; and…
WBGene00002889	let-765	13381.1	N.A.	Predicted to enable chromatin DNA binding activity and histone binding activity. Involved in several processes, including nematode male tail tip morphogenesis\; positive regulation of Ras protein signal transduction\; and vulval cell fate specification. Located in nucleus. Expressed in several structures, including P3.pa\; P3.pp\; P4.pa\; P5.ppp\; and P7.paa. Is an ortholog of human SBNO1 (strawb…
WBGene00004493	rps-24	13314	rps-24 encodes a small ribosomal subunit S24 protein\; by homology, RPS-24 is predicted to function in protein biosynthesis\; in C. elegans, RPS-24 activity is required for germline development and the overall health of the animal.	Predicted to be a structural constituent of ribosome. Predicted to be involved in translation. Predicted to be located in ribosome. Predicted to be part of ribonucleoprotein complex. Human ortholog(s) of this gene implicated in Diamond-blackfan anemia 3. Is an ortholog of human RPS24 (ribosomal protein S24).
WBGene00000913	daf-18	13282.6	daf-18 encodes a lipid phosphatase homologous to the human PTEN tumor suppresor (OMIM:601728, mutated in Cowden disease and several cancers)\; DAF-18 negatively regulates insulin-like signaling mediated by DAF-2\/IR and AGE-1\/PI3K and thus plays a role in metabolism, development, and longevity\; based on sequence and genetic analysis, DAF-18 is predicted to dephosphorylate AGE-1-generated PIP3 i…	Enables protein tyrosine phosphatase activity. Involved in several processes, including determination of adult lifespan\; positive regulation of dauer larval development\; and positive regulation of positive chemotaxis. Acts upstream of with a positive effect on protein import into nucleus. Located in several cellular components, including axon\; cytoplasmic side of plasma membrane\; and somatode…
WBGene00009888	F49E2.5	13267.7	N.A.	Predicted to enable translation initiation factor activity. Predicted to be involved in translational initiation.
WBGene00004128	pqn-41	13259.2	The protein product of this gene is predicted to contain a glutamine\/asparagine (Q\/N)-rich ('prion') domain, by the algorithm of Michelitsch and Weissman (as of the WS77 release of WormBase, i.e., in wormpep77).	Predicted to be located in cytoplasm. Expressed in several structures, including linker cell.
WBGene00011729	set-16	13238.8	set-16 encodes an H3K methyltransferases of the SET1\/mixed lineage leukaemia (MLL) family\; SET-16 regulates levels of H3K4 trimethylation in vivo and the SET-16 SET domain has H3K4 monomethylase activity in vitro\; set-16 is an essential gene and also plays a role in attenuating Ras-mediated signaling during vulval development, by regulating expression of ajm-1, which encodes a component of cel…	Enables histone H3K4 methyltransferase activity. Involved in programmed cell death and regulation of vulval development. Part of MLL3\/4 complex. Expressed in several structures, including P3.p hermaphrodite\; P4.p hermaphrodite\; P5.p hermaphrodite\; P8.p hermaphrodite\; and linker cell. Human ortholog(s) of this gene implicated in several diseases, including Kabuki syndrome\; Kleefstra syndrome…
WBGene00020894	T28D9.1	13234.9	N.A.	Enriched in several structures, including distal tip cell\; germ line\; neurons\; rectal epithelial cell\; and terminal bulb based on Chronogram\; RNA-seq\; single-cell RNA-seq\; and microarray studies. Is affected by several genes including nuo-6\; htz-1\; and etr-1 based on tiling array\; RNA-seq\; proteomic\; and microarray studies. Is affected by nine chemicals including rotenone\; Linolenic …
WBGene00003796	npp-10	13159.7	npp-10 is orthologous to the human gene NUCLEOPORIN, 98-KD (NUP98\; OMIM:601021), which can promote leukemias (myelodysplastic syndromes, AML, or CML) when chromosomally rearranged.	Enables RNA binding activity. Involved in several processes, including mitotic chromosome centromere condensation\; nuclear pore localization\; and protein localization to organelle. Located in P granule\; kinetochore\; and nuclear envelope. Part of nuclear pore. Human ortholog(s) of this gene implicated in T-cell acute lymphoblastic leukemia. Is an ortholog of human NUP98 (nucleoporin 98 and 96 …
WBGene00001994	hpk-1	13139.7	hpk-1 encodes a predicted dual-specificity protein kinase with distant homology to the vertebrate protein kinase DYRK1A and the Drosophila homolog mini-brain\; RNA interference of hpk-1 does not result in any detectable phenotype\; the HPK-1::GFP fusion protein is localized to the nucleus and is expressed in cleavage stage embryos.	Predicted to enable protein serine\/threonine kinase activity and protein tyrosine kinase activity. Involved in autophagosome assembly\; determination of adult lifespan\; and response to stress. Located in nucleus. Expressed in several structures, including gonad and neurons. Used to study Parkinson's disease. Is an ortholog of human HIPK1 (homeodomain interacting protein kinase 1)\; HIPK2 (homeo…
WBGene00013340	tcc-1	13100.6	N.A.	Enables kinesin binding activity. Involved in spindle localization. Located in endoplasmic reticulum membrane.
WBGene00020930	hlh-30	13084.6	hlh-30 encodes a predicted basic helix-loop-helix (bHLH) transcription factor, one of 42 such genes in the C. elegans genome, it is spliced to give 18 different transcripts\; it is orthologous to human microphthalmia-associated transcription factor (HGNC:MITF)\; loss of hlh-30 activity via RNAi results in reduced fat storage\; HLH-30 demonstrates sequence-specific DNA binding for the E box sequen…	Predicted to enable DNA-binding transcription factor activity, RNA polymerase II-specific and RNA polymerase II cis-regulatory region sequence-specific DNA binding activity. Involved in several processes, including defense response to bacterium\; determination of adult lifespan\; and positive regulation of metabolic process. Acts upstream of or within positive regulation of plasma membrane repair…
WBGene00007227	gldi-3	13056.3	N.A.	Predicted to be involved in regulation of gene expression. Predicted to be located in nucleus. Is an ortholog of human TCF19 (transcription factor 19).
WBGene00003040	lin-59	13036.3	lin-59 encodes a SET domain-containing protein that is most closely related to the ASH1 group of histone-lysine N-methyltransferases\; lin-59 was originally identified in screens for mutations that disrupt male tail development and subsequently was shown to be an essential gene required for development and fate specification of a number of different cells types, including those of the male tail, …	Predicted to enable histone H3K36 methyltransferase activity. Involved in several processes, including ectodermal cell fate specification\; egg-laying behavior\; and nematode male tail tip morphogenesis. Predicted to be located in chromatin and nucleus. Expressed in hypodermis\; intestine\; and muscle cell. Used to study leukemia. Human ortholog(s) of this gene implicated in autosomal dominant in…
WBGene00006434	prdx-2	13002.3	prdx-2 encodes one of two C. elegans typical 2-Cys peroxiredoxins,peroxidase enzymes that reduce hydrogen peroxide and contributeto the oxidative-stress response of multicellular organisms\; loss of prdx-2 activity results in increased sensitivity to sublethal dosesof hydrogen peroxide and increased resistance to heavy metals, likely via increased expression of Phase II detoxification enzymes suc…	Enables thioredoxin peroxidase activity. Involved in several processes, including determination of adult lifespan\; positive regulation of brood size\; and response to stress. Located in cytoplasm. Expressed in body wall musculature\; corpus\; gonad\; head\; and tail. Human ortholog(s) of this gene implicated in colorectal cancer\; methylmalonic aciduria and homocystinuria type cblC\; and oral sq…
WBGene00007553	C13G3.1	12998.8	N.A.	Enriched in several structures, including accessory cell\; germ line\; head ganglion\; neurons\; and somatic gonad precursor based on tiling array\; RNA-seq\; single-cell RNA-seq\; and microarray studies. Is affected by several genes including cyc-1\; qui-1\; and htz-1 based on microarray\; tiling array\; and RNA-seq studies. Is affected by twenty-two chemicals including aldicarb\; hydrogen sulfi…
WBGene00015687	chdp-1	12993.6	N.A.	Predicted to be involved in nervous system development. Predicted to be located in cell cortex\; growth cone\; and plasma membrane. Expressed in several structures, including neurons.
WBGene00019324	K02F2.5	12937.7	N.A.	Enriched in head mesodermal cell\; neurons\; and ventral nerve cord based on microarray\; tiling array\; RNA-seq\; and single-cell RNA-seq studies. Is affected by several genes including nuo-6\; atfs-1\; and mter-4 based on microarray\; proteomic\; and RNA-seq studies. Is affected by thirteen chemicals including Psoralens\; allantoin\; and Sirolimus based on RNA-seq\; microarray\; and proteomic s…
WBGene00004459	rpn-2	12903.5	rpn-2 encodes a non-ATPase subunit of the 26S proteasome's 19S regulatory paritcle (RP) base subcomplex\; RPN-2 is required for embryonic, larval, and germline development and by homology, is predicted to function in unfolding and recognition of protein substrates and\/or recycling of ubiquitin moieties during protein degradation\; RPN-2 is expressed sporadically at all stages of development in t…	Enables protein kinase C binding activity. Predicted to be involved in proteasome-mediated ubiquitin-dependent protein catabolic process. Located in several cellular components, including cell cortex\; mitotic spindle\; and nuclear membrane. Expressed in intestine. Is an ortholog of human PSMD1 (proteasome 26S subunit, non-ATPase 1).
WBGene00000175	aqp-7	12874.4	aqp-7 encodes an aquaglyceroporin whose expression in Xenopus oocytes increases either water or glycerol permeability five- to seven-fold\; AQP-7 has no function in mass RNAi assays, perhaps reflecting genetic redundancy with its several paralogs\; AQP-7 is expressed in muscle punctae (perhaps focal adhesions).	Enables water channel activity. Involved in glycerol transmembrane transport and water transport. Predicted to be located in basolateral plasma membrane. Expressed in muscle cell.
WBGene00008053	cdc-48.2	12799.9	cdc-48.2 encodes a AAA (ATPase associated with various cellular activities) ATPase that is one of two C. elegans p97\/VCP\/CDC48 homologs\; cdc-48.2 acts redundantly with cdc-48.1 in endoplasmic reticulum-associated protein degradation (ERAD)\; in addition, cdc-48.1 and cdc-48.2 together provide an essential function during embryonic development\; CDC-48.2 exhibits ATPase activity when expressed …	Enables ATP hydrolysis activity and identical protein binding activity. Involved in several processes, including ERAD pathway\; negative regulation of protein localization to centrosome\; and protein localization to nucleus. Located in nucleus. Part of VCP-NPL4-UFD1 AAA ATPase complex. Expressed in body wall musculature and germ line. Human ortholog(s) of this gene implicated in several diseases,…
WBGene00004423	rpl-11.2	12790.5	rpl-11.2 encodes a large ribosomal subunit L11 protein\; by homology, RPL-11.2 is predicted to function in protein biosynthesis.	Predicted to enable RNA binding activity. Predicted to be a structural constituent of ribosome. Predicted to be involved in translation. Predicted to be located in cytoplasm\; nucleus\; and ribosome. Predicted to be part of cytosolic large ribosomal subunit. Expressed in embryonic cell\; head\; posterior gonad arm\; and tail. Human ortholog(s) of this gene implicated in Diamond-Blackfan anemia 7 …
WBGene00000231	atx-2	12710.2	atx-2 is required for early embryonic patterning\; it encodes an ortholog of human ataxin-2.	Predicted to enable mRNA binding activity. Involved in several processes, including gamete generation\; positive regulation of reproductive process\; and regulation of cell cycle. Located in cytoplasm. Expressed in body wall musculature\; dorsal nerve cord\; germ line\; gonad\; and ventral nerve cord. Used to study autosomal dominant cerebellar ataxia. Human ortholog(s) of this gene implicated in…
WBGene00020808	clik-1	12670.5	N.A.	Predicted to enable actin filament binding activity. Predicted to be involved in actin filament organization. Predicted to be located in actin cytoskeleton.
WBGene00002189	kin-1	12652.6	kin-1 encodes multiple isoforms of a serine\/threonine protein kinase that is orthologous to cAMP-dependent protein kinase (protein kinase A or PKA) catalytic subunits\; KIN-1 is able to phosphorylate histone H2B in vitro and is associated with both particulate (~65\%) and cytosolic (35\%) cellular fractions\; KIN-1 is expressed at low levels during embryogenesis, but its expression level increas…	Enables cAMP-dependent protein kinase activity. Involved in positive regulation of oocyte maturation. Predicted to be located in cytosol and nucleus. Predicted to be part of cAMP-dependent protein kinase complex. Expressed in several structures, including excretory cell\; gonad\; head muscle\; intestine\; and ventral cord neurons. Human ortholog(s) of this gene implicated in several diseases, inc…
WBGene00004458	rpn-1	12628.6	rpn-1 encodes a non-ATPase subunit of the 26S proteasome's 19S regulatory particle (RP) base subcomplex\; rpn-1 activity is essential for embryonic, larval, and germline development\; by homology, RPN-1 is predicted to function in unfolding and recognition of protein substrates and\/or recycling of ubiquitin moieties during protein degradation.	Predicted to enable enzyme regulator activity. Involved in nematode larval development. Predicted to be located in nucleus and proteasome storage granule. Predicted to be part of proteasome regulatory particle, base subcomplex. Is an ortholog of human PSMD2 (proteasome 26S subunit ubiquitin receptor, non-ATPase 2).
WBGene00003827	ntl-4	12585.1	ntl-4 encodes two proteins by alternative splicing, one of which (NTL-4A) has an N-terminal RING finger and a RNA recognition motif ('RRM', 'RBD', or 'RNP'), and both of which have glutamine\/asparagine-rich domains.	Predicted to enable ubiquitin-protein transferase activity. Predicted to be involved in protein ubiquitination. Predicted to be part of CCR4-NOT complex. Is an ortholog of human CNOT4 (CCR4-NOT transcription complex subunit 4).
WBGene00016634	nssp-28	12557.5	N.A.	Enriched in ABaraappaa and neurons based on tiling array\; RNA-seq\; single-cell RNA-seq\; and microarray studies. Is affected by several genes including nuo-6\; atfs-1\; and mter-4 based on microarray and RNA-seq studies. Is affected by thirteen chemicals including rotenone\; D-glucose\; and Psoralens based on RNA-seq and microarray studies.
WBGene00013106	set-26	12551.9	set-26 encodes a large (1,677-residue) protein with a low-complexity N-terminal region, followed by a PHD-zinc finger and a SET domain\; SET-26 has no non-nematode orthologs, but has 96\% identity (1616\/1679 residues) to its paralog SET-9\; unlike its paralog SET-9, SET-26 has no obvious function in RNAi assays.	Enables histone H3K9 methyltransferase activity. Predicted to be involved in chromatin remodeling and methylation. Predicted to be located in nucleus. Expressed in several structures, including germ cell\; hypodermis\; intestine\; muscle cell\; and somatic cell.
WBGene00004036	plc-1	12509.8	plc-1 encodes a predicted phospholipase C that affects fertility and possesses two functional domains not commonly seen in other phospholipases: a C-terminal Ras-associating domain with structural similarity to RalGDS and AF-6, and an N-terminal CDC25-like domain that possesses structural homology to guanine nucleotide exchange proteins for Ras.	Enables GTPase inhibitor activity\; phosphatidylinositol phospholipase C activity\; and small GTPase binding activity. Involved in several processes, including 1-phosphatidyl-1D-myo-inositol 4,5-bisphosphate catabolic process\; defense response to Gram-positive bacterium\; and positive regulation of protein import into nucleus. Expressed in excretory system\; intestine\; neurons\; spermatheca\; a…
WBGene00003916	par-1	12500.7	par-1 encodes a serine-threonine kinase\; maternally provided PAR-1 is essential for establishing early embryonic polarity\; PAR-1 is present in the cytoplasm and in the cell cortex and asymmetrically localized to the posterior cortex of late one-cell stage embryos\; PAR-1 is continuously asymmetrically localized to the P lineage (germline blastomeres) at each subsequent division, and evenly dist…	Enables myosin II tail binding activity\; protein serine\/threonine kinase activity\; and ubiquitin protein ligase binding activity. Involved in several processes, including cell fate commitment\; embryonic pattern specification\; and vulval development. Located in P granule and cell cortex. Expressed in germ line and vulva. Human ortholog(s) of this gene implicated in visual impairment and progr…
WBGene00006595	top-1	12499.8	top-1 encodes the C. elegans DNA topoisomerase I ortholog\; TOP-1 exhibits DNA topoisomerase I activity in vitro and in vivo, this activity is required for normal gonad, germline, and embryonic development\; top-1 mRNA is expressed throughout the gonad and during early embryogenesis, with mRNA levels nearly gone by hatching\; TOP-1 protein levels are highest in embryos and L1 larvae, decrease by …	Enables DNA topoisomerase type I (single strand cut, ATP-independent) activity. Predicted to be involved in DNA replication\; DNA topological change\; and chromosome segregation. Located in nucleolus and spindle pole centrosome. Expressed in several structures, including IL socket cell\; excretory cell\; gonad\; neurons\; and oocyte. Is an ortholog of human TOP1 (DNA topoisomerase I) and TOP1MT (…
WBGene00001385	far-1	12442.5	far-1 encodes a fatty acid\/retinol binding protein\; expressed throughout development with highest expression levels in L3 stage larvae and in adult males.	Predicted to enable lipid binding activity. Predicted to be located in extracellular region. Expressed in male.
WBGene00006759	unc-22	12419.7	unc-22 encodes twitchin, a giant intracellular protein with multiple fibronectin- and immunoglobulin-like domains and a single protein kinase domain that is homologous to titin (OMIM:188840)\; UNC-22 is required in muscle for regulation of the actomyosin contraction-relaxation cycle and for maintenance of normal muscle morphology\; UNC-22 associates with myosin and is localized to A-bands\; in vi…	Enables protein kinase binding activity and protein serine\/threonine kinase activity. Involved in several processes, including adult behavior\; positive regulation of sarcomere organization\; and positive regulation of striated muscle contraction. Located in A band. Expressed in body wall musculature\; pharyngeal muscle cell\; and vulval muscle. Human ortholog(s) of this gene implicated in autos…
WBGene00007588	C14C10.5	12359.3	N.A.	Predicted to enable lysine-acetylated histone binding activity\; peptidase activator activity\; and proteasome binding activity. Predicted to be involved in proteasomal ubiquitin-independent protein catabolic process. Predicted to be located in cytosol and nucleus. Predicted to be part of proteasome complex. Is an ortholog of human PSME4 (proteasome activator subunit 4).
WBGene00008506	tkt-1	12354.3	tkt-1 encodes an ortholog of the human gene TRANSKETOLASE (TKT\; OMIM:606781), which when mutated leads to Wernicke-Korsakoff syndrome (OMIM:277730).	Predicted to enable thiamine pyrophosphate binding activity and transketolase activity. Predicted to be located in mitochondrion. Is an ortholog of human TKT (transketolase) and TKTL2 (transketolase like 2).
WBGene00006794	unc-60	12342.2	unc-60 encodes two, tissue-specific isoforms of actin depolymerizing factor(ADF)\/cofilin, actin-binding proteins that regulate actin filament dynamics\; one UNC-60 isoform, UNC-60A, primarily binds G-actin, depolymerizes actin filaments, and inhibits actin polymerization\; UNC-60A is essential during early embryonic development for polar body extrusion, cytokinesis, and embryonic patterning\; UN…	Enables actin filament binding activity. Involved in several processes, including actin filament-based process\; embryo development\; and positive regulation of actin filament polymerization. Located in striated muscle thin filament. Part of ribonucleoprotein complex. Expressed in several structures, including germ line\; hermaphrodite gonad\; nerve ring\; oocyte\; and vulva. Human ortholog(s) of…
WBGene00004855	sma-1	12318.6	sma-1 encodes a beta-H spectrin\; during embryonic morphogenesis, SMA-1 activity is required for a normal rate of elongation and thus, for a wild-type body length upon hatching\; in addition, SMA-1 is required for proper morphogenesis of the pharynx and the excretory cell\; sma-1 mRNA transcripts are first detected in hypodermal cells at the beginning of embryonic morphogenesis with later express…	Predicted to enable actin filament binding activity. Involved in several processes, including nematode pharyngeal gland morphogenesis\; nematode pharynx development\; and regulation of anatomical structure size. Located in apical plasma membrane\; cytoplasm\; and nucleus. Expressed in several structures, including excretory cell\; hermaphrodite gonad\; neuronal sheath cell\; pharynx\; and vulval …
WBGene00006959	xbp-1	12272.2	xbp-1 encodes a bZIP transcription factor orthologous to yeast Hac1 and mammalian X box-binding protein 1 (XBP-1, OMIM:194355)\; XBP-1 is required for the unfolded protein response (UPR) that counteracts cellular stress induced by accumulation of unfolded proteins in the endoplasmic reticulum (ER)\; xbp-1 mRNA is spliced by the IRE-1 endoribonuclease to promote translation of transcriptionally ac…	Enables RNA polymerase II transcription regulatory region sequence-specific DNA binding activity. Involved in several processes, including determination of adult lifespan\; positive regulation of transcription by RNA polymerase II\; and response to stress. Acts upstream of with a positive effect on negative regulation of multicellular organismal process. Predicted to be located in nucleus. Expres…
WBGene00004302	ran-1	12268.1	ran-1 encodes the C. elegans Ran GTPase ortholog\; ran-1 activity is essential for proper mitotic spindle formation, effective connection between centrosomes and the male pronucleus, nuclear envelope assembly after cell division, and oocyte meiotic maturation\; in regulating nuclear envelope dynamics, ran-1 appears to function upstream of MEL-28 by regulating its localization to the nuclear perip…	Predicted to enable GTPase activity. Involved in embryo development and oogenesis. Predicted to be located in cytoplasm and nucleus. Human ortholog(s) of this gene implicated in type 1 diabetes mellitus. Is an ortholog of human RAN (RAN, member RAS oncogene family).
WBGene00008378	ule-3	12266.6	N.A.	Enriched in several structures, including MSpppaaa\; PVQL\; germ line\; head mesodermal cell\; and spermatheca based on tiling array\; RNA-seq\; proteomic\; and single-cell RNA-seq studies. Is affected by several genes including cyc-1\; nuo-6\; and mut-16 based on microarray\; RNA-seq\; proteomic\; and tiling array studies. Is affected by twenty chemicals including ethanol\; rotenone\; and mangan…
WBGene00000065	act-3	12238.1	act-3 encodes an invertebrate actin, highly similar to ACT-1, ACT-2, and ACT-4, that functions in body wall muscle\; act-3 functions with two other action isoforms, act-1 and act-2, to control cytoplasmic microfilament function in the early embryo.	Expressed in gonad and head. Human ortholog(s) of this gene implicated in several diseases, including Baraitser-Winter syndrome 1\; Baraitser-Winter syndrome 2\; and autosomal dominant nonsyndromic deafness 20. Is an ortholog of human ACTB (actin beta). Human ACTB contributes to nucleosomal DNA binding activity. Human ACTB enables several functions, including ATP hydrolysis activity\; Tat protein…
WBGene00000912	daf-16	12168.6	daf-16 encodes the sole C. elegans forkhead box O (FOXO) homologue\; DAF-16 functions as a transcription factor that acts in the insulin\/IGF-1-mediated signaling (IIS) pathway that regulates dauer formation, longevity, fat metabolism, stress response, and innate immunity\; DAF-16 regulates these various processes through isoform-specific expression, isoform-specific regulation by different AKT k…	Enables several functions, including 14-3-3 protein binding activity\; DNA-binding transcription activator activity, RNA polymerase II-specific\; and enzyme binding activity. Involved in several processes, including regulation of dauer larval development\; regulation of metabolic process\; and response to stress. Located in cytosol and nucleus. Expressed in several structures, including germ cell…
WBGene00004740	scd-2	12135.1	scd-2 encodes the homolog of the anaplastic lymphoma kinase (ALK) receptor tyrosine kinase (RTK) (OMIM:105590, involved in the development of non-Hodgkin's lymphoma in humans)\; the ALK family of receptor tyrosine kinases belong to the insulin receptor superfamily\; scd-2 was initially identified in a naturally occuring desert oasis strain of C. elegans that fails to respond to the dauer pheromon…	Predicted to enable ATP binding activity and transmembrane receptor protein tyrosine kinase activity. Involved in dauer larval development\; sensory perception of chemical stimulus\; and sensory processing. Predicted to be located in plasma membrane. Expressed in AIAL\; AIAR\; NSML\; and NSMR. Is an ortholog of human ALK (ALK receptor tyrosine kinase) and LTK (leukocyte receptor tyrosine kinase).
WBGene00012100	sipa-1	12108.8	T27F2.2 encodes a homolog of human SIPA1\/EHBP1L1 (OMIM:602180) and itsparalogs.	Predicted to enable GTPase activator activity. Predicted to be involved in regulation of small GTPase mediated signal transduction. Predicted to be located in cytoplasm. Human ortholog(s) of this gene implicated in cataract 45. Is an ortholog of several human genes including SIPA1 (signal-induced proliferation-associated 1)\; SIPA1L1 (signal induced proliferation associated 1 like 1)\; and SIPA1L…
WBGene00001980	hmr-1	12095.7	hmr-1 encodes two isoforms of a classical cadherin that contain extracellular cadherin, EGF-like, and laminin G domains as well as a highly conserved intracellular domain that binds beta-catenin\; by homology, the HMR-1 proteins are predicted to function as calcium-dependent, homophilic cell-cell adhesion receptors\; in vivo, HMR-1A activity is required for mediating the cell migrations, cell sha…	Enables beta-catenin binding activity and delta-catenin binding activity. Involved in several processes, including cell-cell adhesion mediated by cadherin\; cytoskeleton organization\; and gastrulation. Located in adherens junction\; distal dendrite\; and plasma membrane. Part of catenin complex. Expressed in several structures, including germline precursor cell\; hypodermis\; motor neurons\; ner…
WBGene00022245	acp-6	12086.7	N.A.	Predicted to enable phosphatase activity.
WBGene00020588	T19H12.2	12085.1	N.A.	Predicted to enable histone binding activity. Predicted to be located in nucleus. Expressed in germ line. Is an ortholog of human ANP32B (acidic nuclear phosphoprotein 32 family member B)\; ANP32CP (acidic nuclear phosphoprotein 32 family member C, pseudogene)\; and ANP32E (acidic nuclear phosphoprotein 32 family member E).
WBGene00004426	rpl-14	12012.3	rpl-14 encodes a large ribosomal subunit L14 protein.	Predicted to enable RNA binding activity. Predicted to be a structural constituent of ribosome. Predicted to be involved in ribosomal large subunit biogenesis. Predicted to be located in ribosome. Predicted to be part of cytosolic large ribosomal subunit. Human ortholog(s) of this gene implicated in systemic lupus erythematosus. Is an ortholog of human RPL14 (ribosomal protein L14).
WBGene00009050	mstr-1	11995.9	N.A.	Predicted to enable DNA binding activity and zinc ion binding activity. Located in nucleus. Is an ortholog of human ZFAND5 (zinc finger AN1-type containing 5) and ZFAND6 (zinc finger AN1-type containing 6).
WBGene00000733	col-160	11988.2	N.A.	Predicted to be a structural constituent of cuticle. Predicted to be located in membrane. Predicted to be part of collagen trimer.
WBGene00004130	ketn-1	11973.3	ketn-1 encodes an ortholog of kettin (in D. melanogaster, SALLIMUS), an invertebrate isoform or paralog of titin\; ketn-1 is transcriptionally upregulated two-fold by hypoxia, requires both HIF-1 and VHL-1 for this induction, and contains three predicted HIF-1 binding sites in its predicted 5' regulatory region\; ketn-1's induction by hypoxia correlates with upregulation of other genes required f…	Predicted to enable actin binding activity. Located in I band. Expressed in anal depressor muscle\; body wall musculature\; male gonad\; and pharyngeal muscle cell.
WBGene00001558	gdi-1	11971.6	gdi-1 encodes a member of the Rab GDP dissociation inhibitor (GDI) family with high similarity to Drosophila Gdi\; expressed around the pharyngeal, vulval, and tail regions.	Predicted to enable Rab GDP-dissociation inhibitor activity. Predicted to be involved in vesicle-mediated transport. Predicted to be located in cytosol. Human ortholog(s) of this gene implicated in Down syndrome\; non-syndromic X-linked intellectual disability 41\; and psychotic disorder. Is an ortholog of human GDI1 (GDP dissociation inhibitor 1) and GDI2 (GDP dissociation inhibitor 2).
WBGene00004215	ptp-3	11930.6	ptp-3 encodes a receptor-like tyrosine phosphatase orthologous to the LAR (Leukocyte Common Antigen Related, OMIM:179590) subfamily of receptor-like tyrosine phosphatases that contain extracellular immunoglobulin-like and fibronectin type III domains and have been implicated in linking cell adhesion to intracellular phosphotyrosine levels\; PTP-3 plays a role in gastrulation and epidermal develop…	Enables protein tyrosine phosphatase activity. Involved in several processes, including embryonic morphogenesis\; nervous system development\; and neuroblast migration. Located in adherens junction and synapse. Expressed in embryonic cell\; hypodermis\; and nervous system. Human ortholog(s) of this gene implicated in artery disease (multiple)\; glucose metabolism disease (multiple)\; and obesity.…
WBGene00004441	rpl-27	11924	rpl-27 encodes a large ribosomal subunit L27 protein.	Predicted to be a structural constituent of ribosome. Predicted to be involved in translation. Predicted to be located in cytoplasmic side of rough endoplasmic reticulum membrane. Predicted to be part of cytosolic large ribosomal subunit. Human ortholog(s) of this gene implicated in Diamond-Blackfan anemia 16. Is an ortholog of human RPL27 (ribosomal protein L27).
WBGene00003793	npp-7	11913.3	N.A.	Predicted to enable nuclear localization sequence binding activity. Predicted to be a structural constituent of nuclear pore. Involved in several processes, including determination of adult lifespan\; nucleus organization\; and regulation of exit from mitosis. Located in nuclear membrane. Part of nuclear pore. Is an ortholog of human POM121 (POM121 transmembrane nucleoporin) and POM121C (POM121 t…
WBGene00022089	Y69A2AR.18	11896.2	N.A.	Predicted to contribute to proton-transporting ATP synthase activity, rotational mechanism. Predicted to be involved in proton motive force-driven ATP synthesis. Predicted to be located in membrane. Predicted to be part of proton-transporting ATP synthase complex, catalytic core F(1). Expressed in tail. Human ortholog(s) of this gene implicated in obesity. Is an ortholog of human ATP5F1C (ATP syn…
WBGene00006820	unc-89	11852.3	unc-89 encodes several protein isoforms variably characterized by the presence or absence of SH3, DH, PH, immunoglobulin and myosin light chain kinase (MLCK)-like protein kinase domains\; during development, unc-89 is required for proper organization of A bands in striated muscle and thus for fully normal locomotion, pharyngeal muscle contractions, and body size\; unc-89 is expressed in body wall…	Enables MATH domain binding activity\; enzyme binding activity\; and guanyl-nucleotide exchange factor activity. Involved in several processes, including myofibril assembly\; nematode pharyngeal gland morphogenesis\; and regulation of striated muscle contraction. Located in M band. Expressed in alimentary muscle\; gonad\; tail\; and vulval muscle. Human ortholog(s) of this gene implicated in cent…
WBGene00004373	rme-1	11851.6	rme-1 encodes a conserved, EPS15 homology (EH) domain-containing protein\; RME-1 is required for endocytosis, specifically for modulating endocytic transport through the endosomal recycling compartment (ERC)\; RME-1 is ubiquitously expressed and, in the polarized intestinal epithelium, is found on basolateral recycling endosomes.	Enables ATP hydrolysis activity and protein domain specific binding activity. Involved in several processes, including endocytic recycling\; lipid tube assembly involved in organelle fission\; and necroptotic process. Located in recycling endosome membrane. Expressed in coelomocyte\; germ line\; gonad\; intestine\; and pharynx. Is an ortholog of human EHD1 (EH domain containing 1).
WBGene00003559	ncl-1	11841	ncl-1 encodes a cytoplasmic B-box zinc finger protein that negatively regulates rRNA and 5S RNA transcription, nucleolus size, and body size\; NCL-1 is orthologous to Drosophila BRAIN TUMOR (BRAT), and ncl-1 mutants can be rescued by brat transgenes\; NCL-1 is required for the normally small size of neuronal, muscle, and hypodermal nucleoli, and is already active in 4-cell embryos\; NCL-1 may be …	Enables translation repressor activity. Involved in several processes, including negative regulation of DNA-templated transcription\; negative regulation of ribosome biogenesis\; and nucleologenesis. Located in cytoplasm. Expressed in head and tail. Is an ortholog of human TRIM3 (tripartite motif containing 3).
WBGene00016006	fln-2	11836.4	N.A.	Predicted to enable actin filament binding activity. Predicted to be involved in actin cytoskeleton organization. Expressed in several structures, including anal depressor muscle\; distal tip cell\; excretory canal\; hypodermis\; and vulva.
WBGene00000223	atf-7	11819.8	atf-7 encodes a basic-region leucine zipper (bZIP) transcription factor orthologous to members of the ATF2\/ATF7\/CREB5 family of cyclic AMP-response element binding (CREB)\/activating transcription factors (ATFs)\; ATF-7 plays a key role in the innate immune response by regulating the expression of immune genes downstream of PMK-1\/p38 MAPK\; ATF-7 is likely converted from a transcriptional repr…	Enables RNA polymerase II cis-regulatory region sequence-specific DNA binding activity and mitogen-activated protein kinase binding activity. Involved in several processes, including defense response to bacterium\; regulation of innate immune response\; and regulation of transcription by RNA polymerase II. Acts upstream of or within serotonin biosynthetic process. Located in chromatin and nucleus…
WBGene00008546	gfat-1	11819.1	gfat-1 encodes two isoforms of glucosamine--fructose-6-phosphate aminotransferase (EC:2.6.1.16, also known as glutamine-fructose-6-phosphate transaminase), paralogous to GFAT-2\; GFAT-1 is predicted to catalyze the first, and rate-limiting, step of the hexosamine pathway in which glucosamine-6-phosphate is synthesized from L-glutamine and fructose-6-phosphate and ultimately converted to UDP-N-ace…	Predicted to enable glutamine-fructose-6-phosphate transaminase (isomerizing) activity. Involved in IRE1-mediated unfolded protein response. Expressed in tail. Used to study Machado-Joseph disease. Human ortholog(s) of this gene implicated in congenital myasthenic syndrome 12\; obesity\; and type 2 diabetes mellitus. Is an ortholog of human GFPT1 (glutamine--fructose-6-phosphate transaminase 1).
WBGene00000063	act-1	11778.3	act-1 encodes an actin isoform that is required for proper body wall muscle and pharyngeal muscle structures and the motility of animals\; actins have highly similar amino acid sequences\; ACT-1 is identical to ACT-3\; act-1 functions redundantly with two other actin isoforms, act-2 and act-3, to control cytoplasmic microfilament function in the early embryo.	Predicted to be a structural constituent of cytoskeleton. Involved in cortical actin cytoskeleton organization\; embryo development\; and mitotic cytokinesis. Located in striated muscle thin filament. Expressed in body wall musculature and gonad. Human ortholog(s) of this gene implicated in several diseases, including Baraitser-Winter syndrome 1\; Baraitser-Winter syndrome 2\; and autosomal domin…
WBGene00013766	prmt-1	11736.5	prmt-1 encodes a type I protein arginine methyltransferase\; in C. elegans, PRMT-1 positively regulates adult lifespan and is required for stress response and fat storage in the absence of DAF-2-mediated signaling\; PRMT-1 is also required for proper development of myofilament structure\; PRMT-1 physically interacts with, and methylates, DAF-16 thereby preventing its phosphorylation and cytoplasm…	Enables S-adenosyl-L-methionine binding activity and protein methyltransferase activity. Involved in several processes, including positive regulation of protein localization to nucleus\; regulation of dauer entry\; and response to stress. Located in cytoplasm. Expressed in head\; intestinal cell\; pharyngeal cell\; ventral nerve cord\; and vulval cell. Is an ortholog of human PRMT8 (protein argin…
WBGene00004147	larp-5	11731.3	larp-5 encodes an La-related protein containing an La RNA-binding motif and a conserved LARP5 domain\; LARP-5 is most closely related to the Larp5 family of metazoan-specific La proteins that includes human and mouse Larp5 as well as Drosophila melanogaster CG11505.	Predicted to enable mRNA 3'-UTR binding activity. Predicted to be involved in positive regulation of translation. Predicted to be located in cytoplasmic stress granule and cytosol. Expressed in PVDL\; PVDR\; and neurons. Is an ortholog of human LARP4 (La ribonucleoprotein 4) and LARP4B (La ribonucleoprotein 4B).
WBGene00004760	sel-2	11729.8	sel-2 encodes a PH, BEACH and WD40 domain-containing protein that is homologous to mammalian neurobeachin\/BCL8B and LRBA (LPS-responsive, beige-like anchor protein)\; during development, SEL-2 functions to regulate endosomal traffic in polarized epithelial cells such as the vulval precursor cells (VPCs) and intestinal cells\; specifically, in a subset of the VPCs, SEL-2 activity is required for …	Predicted to enable protein kinase binding activity. Involved in several processes, including apical protein localization\; negative regulation of Notch signaling pathway\; and regulation of vulval development. Located in perinuclear region of cytoplasm. Expressed in several structures, including ganglia\; pharyngeal-intestinal valve\; rectum\; somatic nervous system\; and vulva. Used to study au…
WBGene00004452	rpl-38	11697	rpl-38 encodes a large ribosomal subunit L38 protein.	Predicted to be a structural constituent of ribosome. Predicted to be involved in protein-RNA complex assembly. Predicted to be located in ribosome. Predicted to be part of cytosolic large ribosomal subunit. Is an ortholog of human RPL38 (ribosomal protein L38).
WBGene00007028	trr-1	11671.6	trr-1 encodes proteins with similarity to the atypical protein kinases of the TRAAP subfamily of PIKK kinases that are found in multisubunit, chromatin-modifying histone acetyltransferase complexes\; trr-1 functions as a negative regulator of let-60\/Ras signaling and was initially identified in screens for synMuv genes that interact with lin-15A\; trr-1 mutations were subsequently found to have …	Involved in negative regulation of vulval development and positive regulation of growth rate. Located in condensed chromosome and nucleus. Expressed in several structures, including P3.p hermaphrodite\; P4.p hermaphrodite\; P5.p hermaphrodite\; P8.p hermaphrodite\; and germ line. Human ortholog(s) of this gene implicated in autosomal dominant nonsyndromic deafness 75. Is an ortholog of human TRRA…
WBGene00003776	nmy-1	11648.7	nmy-1 encodes a class II non-muscle myosin heavy chain related to Drosophila zipper, which plays a role in several aspects of embryonic morphogenesis\; in C. elegans, NMY-1 is required for embryonic elongation and establishment of normal body morphology\; however, nmy-1 functions redundantly with another non-muscle myosin heavy chain gene, nmy-2, during elongation and establishment of normal body…	Predicted to enable actin filament binding activity and microfilament motor activity. Involved in several processes, including nematode larval development\; protein localization\; and regulation of embryonic cell shape. Located in adherens junction and contractile muscle fiber. Expressed in head\; hypodermis\; and tail. Human ortholog(s) of this gene implicated in several diseases, including aort…
WBGene00007969	acs-19	11631.1	N.A.	Predicted to enable acetate-CoA ligase activity. Involved in positive regulation of proteasomal ubiquitin-dependent protein catabolic process and regulation of response to oxidative stress. Expressed in hypodermis\; intestine\; neurons\; and pharynx. Human ortholog(s) of this gene implicated in lymphangioleiomyomatosis\; morbid obesity\; and orofacial cleft. Is an ortholog of human ACSS2 (acyl-Co…
WBGene00004862	sma-9	11611.3	sma-9 encodes, by extensive alternative splicing, at least 13 isoforms, a number of which are large (~2000-residue) proteins with at least three N-terminal involucrin domains, seven C-terminal zinc-finger domains, and a glutamine\/asparagine-rich domain\; SMA-9 is orthologous to the Drosophila Smad cofactor Schnurri (FBgn0003396) and the vertebrate HIVEP proteins (Human Immunodeficiency Virus Typ…	Enables transcription coactivator activity and transcription corepressor activity. Involved in several processes, including determination of adult lifespan\; nematode male tail tip morphogenesis\; and regulation of gene expression. Acts upstream of or within cellular response to heat. Located in nucleus. Expressed in several structures, including excretory cell\; intestine\; spermatheca\; ventral…
WBGene00003476	mtm-3	11563.4	mtm-3 encodes, by alternative splicing, two isoforms of a myotubularin lipid phosphatase orthologous to human MTMR3 and MTMR4 and paralogous to MTM1\; MTM-3 is required for normal locomotion in older adults and for normally long lifespan\; MTM-3 has phosphatidylinositol 3-phosphate (PI3P) phosphatase activity\; MTM-3 contains a C-terminal FYVE domain that binds PI3P in vitro\; MTM-3 is expressed …	Enables inositol bisphosphate phosphatase activity and phosphatidylinositol phosphate phosphatase activity. Involved in several processes, including determination of adult lifespan\; positive regulation of autophagosome maturation\; and regulation of endocytosis. Located in cytoplasm. Expressed in body wall musculature and head neurons. Is an ortholog of human MTMR3 (myotubularin related protein …
WBGene00012326	W07E11.1	11542	N.A.	Predicted to enable glutamate synthase (NADH) activity. Predicted to be involved in ammonia assimilation cycle and glutamate biosynthetic process.
WBGene00020229	nlp-99	11515.8	N.A.	Enriched in head mesodermal cell\; neurons\; retrovesicular ganglion\; uv3\; and ventral nerve cord based on microarray\; tiling array\; RNA-seq\; and single-cell RNA-seq studies. Is affected by several genes including cyc-1\; swsn-2.2\; and nuo-6 based on microarray and RNA-seq studies. Is affected by fourteen chemicals including rotenone\; D-glucose\; and stavudine based on RNA-seq and microarr…
WBGene00006604	tra-1	11511.8	tra-1 encodes Zn2+-finger-containing proteins that are the sole C. elegans members of the GLI transcription factor family\; during development, tra-1 functions cell autonomously as the terminal regulator of the sex determination pathway and positively regulates all aspects of hermaphrodite somatic sexual differentiation\; in addition, tra-1 activity is required for proper development of the male …	Enables RNA polymerase II cis-regulatory region sequence-specific DNA binding activity and RNA polymerase II intronic transcription regulatory region sequence-specific DNA binding activity. Involved in developmental process involved in reproduction\; negative regulation of transcription by RNA polymerase II\; and positive regulation of neuron apoptotic process. Located in cytoplasm and nucleus. E…
WBGene00000542	clp-1	11505.1	clp-1 encodes a calpain homolog that has significant identity to mammalian calpains over its whole length and that contains motifs typical of calpains, including a thiol (cysteine) protease active site and a Ca[2+]-binding domain\; CLP-1 is required, in parallel with TRA-3 but in series with ASP-3 and ASP-3, for degenerative (necrotic-like) cell death in neurons induced by mutations such as mec-4…	Predicted to enable calcium-dependent cysteine-type endopeptidase activity. Involved in several processes, including cellular response to calcium ion\; muscle cell cellular homeostasis\; and positive regulation of sarcomere organization. Located in M band. Expressed in GABAergic neurons\; hypodermis\; intestine\; pharyngeal muscle cell\; and vulva. Used to study Duchenne muscular dystrophy and he…
WBGene00004446	rpl-32	11500.6	rpl-32 encodes a large ribosomal subunit L32 protein.	Predicted to be a structural constituent of ribosome. Predicted to be involved in translation. Predicted to be located in ribosome. Predicted to be part of cytosolic large ribosomal subunit. Is an ortholog of human RPL32 (ribosomal protein L32).
WBGene00003370	mlc-2	11499.2	mlc-2 encodes, along with mlc-1 and mlc-4, one of three C. elegans regulatory myosin light chains\; MLC-2 is predicted to function as a regulator of myosin ATPase activity, and genetic studies indicate that MLC-2 is nearly essential in hermaphrodites for normal pharyngeal muscle function, but redundant with MLC-1, with which it is nearly identical, for proper bodywall muscle development\; accordi…	Predicted to enable myosin heavy chain binding activity. Involved in several processes, including nematode larval development\; regulation of muscle contraction\; and regulation of nematode pharyngeal pumping. Predicted to be located in cytoplasm. Predicted to be part of myosin II complex. Expressed in body wall musculature\; pharyngeal muscle cell\; pharynx\; and vulval muscle. Human ortholog(s)…
WBGene00004274	rab-11.1	11488.1	rab-11.1 encodes a small GTPase homologous to the Rab GTPases that function in endocytosis, membrane fusion, and vesicular trafficking events\; RAB-11.1 activity is required for completion of the final stages of cytokinesis during early embryogenesis and for efficient uptake of yolk proteins during oocyte development\; RAB-11.1 is also required for normal peripheral localization of nuclei in the …	Predicted to enable GTP binding activity and GTPase activity. Involved in several processes, including eggshell formation\; membrane addition at site of mitotic cytokinesis\; and vesicle-mediated transport. Located in Golgi trans cisterna membrane\; cortical granule\; and recycling endosome. Expressed in gonad. Is an ortholog of human RAB11A (RAB11A, member RAS oncogene family).
WBGene00011063	cpg-3	11470.1	cgp-3 encodes a putatively secreted protein with an N-terminallow-complexity domain containing 15 potential chondroitin attachmentsites, and a C-terminal EGF-like region\; cpg-3 mRNA is enriched inoogenesis, but CPG-3 has no obvious function in mass RNAi assays.	Expressed in germ line.
WBGene00022951	C30E1.9	11423.7	N.A.	Enriched in neurons and retrovesicular ganglion based on RNA-seq\; single-cell RNA-seq\; and microarray studies. Is affected by several genes including fzo-1\; nuo-6\; and etr-1 based on tiling array\; RNA-seq\; and microarray studies. Is affected by twelve chemicals including 1-methylnicotinamide\; rotenone\; and paraquat based on RNA-seq and microarray studies.
WBGene00006764	unc-27	11394.6	unc-27 encodes a troponin I isoform\; unc-27 is required for coordinated motility and normal muscle morphology\; structural analyses indicate that unc-27 is required for proper sarcomeric organization\; unc-27\/troponin I interacts with the body wall and pharynx types of troponin C\; expression studies show that unc-27 is expressed in body wall, vulval and anal muscles.	Enables troponin C binding activity. Involved in locomotion and sarcomere organization. Located in sarcomere. Expressed in body wall musculature\; non-striated muscle\; and rectal muscle. Human ortholog(s) of this gene implicated in several diseases, including arthrogryposis multiplex congenita\; distal arthrogryposis type 2B1\; and intrinsic cardiomyopathy (multiple). Is an ortholog of human TNN…
WBGene00009375	arcp-1	11362.2	N.A.	Expressed in ciliated neurons.
WBGene00011501	rmd-1	11354.7	N.A.	Enables kinase binding activity. Involved in attachment of mitotic spindle microtubules to kinetochore and mitotic spindle organization. Located in mitotic spindle pole and spindle microtubule. Expressed in germ line. Is an ortholog of human RMDN1 (regulator of microtubule dynamics 1)\; RMDN2 (regulator of microtubule dynamics 2)\; and RMDN3 (regulator of microtubule dynamics 3).
WBGene00003159	mcm-7	11316.6	mcm-7 encodes the C. elegans ortholog of the MCM7 member of the MCM complex, a hexameric protein complex required for the initiation and regulation of DNA replication.	Predicted to enable single-stranded DNA binding activity. Predicted to contribute to single-stranded DNA helicase activity. Involved in MCM complex assembly\; embryo development\; and mitotic sister chromatid segregation. Predicted to be located in nucleus. Predicted to be part of MCM complex. Expressed in several structures, including anchor cell\; intestine\; tail\; uterine epithelial cell\; an…
WBGene00001226	eif-3.C	11303.7	eif-3.C encodes a putative c subunit of translation initiation factor 3 that is required for fertility and for embryonic osmotic integrity\; eif-3.C is orthologous to human EIF3S8 (OMIM:603916) and budding yeast NIP1.	Predicted to enable translation initiation factor binding activity. Predicted to contribute to translation initiation factor activity. Predicted to be involved in translational initiation. Predicted to be located in cytoplasm. Predicted to be part of eukaryotic translation initiation factor 3 complex. Is an ortholog of human EIF3C (eukaryotic translation initiation factor 3 subunit C) and EIF3CL …
WBGene00045129	Y75B12B.12	11283.3	N.A.	Enriched in Q cell based on RNA-seq studies. Is affected by several genes including etr-1\; prg-1\; and hpl-2 based on tiling array\; RNA-seq\; and microarray studies.
WBGene00018700	lmd-3	11280.6	N.A.	Involved in determination of adult lifespan\; response to heat\; and response to oxidative stress. Predicted to be located in nucleus. Expressed in head. Human ortholog(s) of this gene implicated in cerebellar hyplasia\/atrophy, epilepsy, and global developmental delay. Is an ortholog of human OXR1 (oxidation resistance 1).
WBGene00002025	hsp-60	11262.7	hsp-60 encodes a nuclear-encoded mitochondrion-specific chaperone that is a member of the GroE\/Hsp10\/60 superfamily of molecular chaperones\; hsp-60 is involved in the mitochondrial unfolded protein response, as hsp-60 expression, normally broadly detected during development, is greatly increased in response to treatments that disrupt mitochondrial protein handling\; loss of hsp-60 activity via…	Enables RNA polymerase II-specific DNA-binding transcription factor binding activity. Involved in several processes, including mitochondrial unfolded protein response\; mitochondrion organization\; and nematode larval development. Located in mitochondrion. Expressed in hypodermis\; intestine\; muscle cell\; and neurons. Human ortholog(s) of this gene implicated in several diseases, including Alzh…
WBGene00002074	ima-3	11228.2	ima-3 encodes one of three C. elegans importin alpha nuclear transport factors and the importin alpha that is most similar to the alpha3-subtype\; ima-3 activity is required throughout development: during oogenesis, ima-3 is essential for progression past pachytene of meiotic prophase I and for proper organization of the nuclear pore complex (NPC) as well as association of P granules with the NPC…	Enables DNA-binding transcription factor binding activity\; nuclear import signal receptor activity\; and nuclear localization sequence binding activity. Involved in several processes, including NLS-bearing protein import into nucleus\; positive regulation of axon extension involved in regeneration\; and sexual reproduction. Located in cytoplasm and nuclear envelope. Part of nuclear pore. Express…
WBGene00006405	itsn-1	11184.3	itsn-1 encodes an EF hand and SH3 domain-containing protein that is homologous to the vertebrate and Drosophila intersectins\; ITSN-1 functions as an endocytic adaptor protein to regulate cargo sorting through the endolysosomal system\; ITSN-1 is also required, together with EHS-1, for synaptic vesicle recycling and hence, regulation of neurotransmission\; in addition, ITSN-1 appears to function …	Predicted to enable molecular adaptor activity. Involved in positive regulation of synaptic vesicle endocytosis. Located in endocytic vesicle and presynaptic periactive zone. Expressed in neurons\; somatic nervous system\; tail\; and vulva. Is an ortholog of human ITSN2 (intersectin 2).
WBGene00006839	unc-115	11159.5	unc-115 encodes a protein that binds actin filaments and that is required for RAS signalling and UNC-40\/netrin activity during axon pathfinding.	Enables actin filament binding activity. Involved in neuron projection morphogenesis\; regulation of filopodium assembly\; and regulation of lamellipodium assembly. Located in basal plasma membrane and cytoplasm. Expressed in several structures, including PDE\; excretory cell\; pharynx\; somatic nervous system\; and vulva. Is an ortholog of human ABLIM2 (actin binding LIM protein family member 2).
WBGene00017675	F21F3.6	11066.6	N.A.	Predicted to be located in lysosomal membrane.
WBGene00003564	ncs-2	11056.6	N.A.	Predicted to enable calcium ion binding activity. Predicted to be involved in regulation of signal transduction. Expressed in GABAergic neurons\; cholinergic neurons\; motor neurons\; nervous system\; and ventral nerve cord. Is an ortholog of human RCVRN (recoverin).
WBGene00004482	rps-13	11056	rps-13 encodes a small ribosomal subunit S13 protein\; by homology, RPS-13 is predicted to function in protein biosynthesis\; in C. elegans, RPS-13 activity is required for embryonic and germline development.	Predicted to enable small ribosomal subunit rRNA binding activity. Predicted to be a structural constituent of ribosome. Predicted to be involved in ribosomal small subunit biogenesis. Predicted to be located in nucleolus. Predicted to be part of cytosolic small ribosomal subunit and small-subunit processome. Is an ortholog of human RPS13 (ribosomal protein S13).
WBGene00010730	ensa-1	11031.8	ensa-1 encodes the C. elegans ortholog of alpha-endosulfine, a conserved family of cAMP-regulated phosphoproteins\; loss of ensa-1 activity results in viable and fertile animals with only slight cell cycle delays in the embryonic blastomeres AB and P1\; when expressed in Xenopus oocytes, however, a phosphomimetic ENSA-1 mutant is able to suppress activity of the PP2A\/B55 phosphatase.	Predicted to enable protein phosphatase inhibitor activity. Predicted to be involved in cell division. Predicted to be located in cytoplasm. Is an ortholog of human ENSA (endosulfine alpha).
WBGene00010677	gtbp-1	11015.1	N.A.	Predicted to enable mRNA binding activity. Predicted to be involved in stress granule assembly. Located in cytoplasmic stress granule. Expressed widely. Is an ortholog of human G3BP1 (G3BP stress granule assembly factor 1) and G3BP2 (G3BP stress granule assembly factor 2).
WBGene00007703	gbf-1	11014.3	N.A.	Predicted to enable guanyl-nucleotide exchange factor activity. Involved in several processes, including endoplasmic reticulum organization\; endosomal transport\; and mitochondrion organization. Located in Golgi cis cisterna and endoplasmic reticulum exit site. Human ortholog(s) of this gene implicated in Charcot-Marie-Tooth disease dominant intermediate A. Is an ortholog of human GBF1 (golgi br…
WBGene00018145	F37C4.5	11006.4	N.A.	Predicted to be located in mitochondrion.
WBGene00006923	vhp-1	10990.6	vhp-1 encodes a MAP kinase phosphatase (MKP)\; VHP-1 activity is required for regulation of the KGB-1\/JNK-like MAPK-mediated stress response pathway.	Enables JUN kinase phosphatase activity and MAP kinase tyrosine\/serine\/threonine phosphatase activity. Involved in several processes, including negative regulation of MAPK cascade\; regulation of defense response to bacterium\; and regulation of protein localization to nucleus. Acts upstream of with a negative effect on protein catabolic process. Predicted to be located in cytoplasm and nucleus…
WBGene00002363	let-92	10970.2	let-92 encodes a homolog of PP2AC, the catalytic subunit of protein phosphatase 2A (PP2A)\; let-92 was identified genetically in screens for essential genes on chromosome IV\; LET-92 may regulate a number of signal transduction pathways as it is required for embryogenesis, larval development, Ras-mediated vulval development, and axonal guidance in the DD and VD neurons\; let-92 interacts genetica…	Enables DEAD\/H-box RNA helicase binding activity. Involved in microtubule cytoskeleton organization and nuclear envelope organization. Located in several cellular components, including axonal growth cone\; centrosome\; and neuronal cell body. Part of protein phosphatase type 2A complex. Human ortholog(s) of this gene implicated in Parkinson's disease\; congestive heart failure\; and prostate can…
WBGene00022410	Y97E10C.1	10892.7	N.A.	Enriched in several structures, including anal sphincter muscle\; anchor cell\; head mesodermal cell\; intestine\; and neurons based on tiling array\; RNA-seq\; single-cell RNA-seq\; and microarray studies. Is affected by several genes including cyc-1\; hyl-2\; and cyd-1 based on microarray\; tiling array\; and RNA-seq studies. Is affected by nineteen chemicals including rotenone\; D-glucose\; an…
WBGene00009180	nurf-1	10881.4	nurf-1 encodes the C. elegans ortholog of Drosophila NURF301, a component of the NURF chromatin remodeling complex\; in C. elegans, nurf-1 acts with isw-1 to regulate vulval development.	Predicted to enable RNA polymerase II cis-regulatory region sequence-specific DNA binding activity and methylated histone binding activity. Involved in positive regulation of transcription by RNA polymerase II. Predicted to be located in nucleus. Predicted to be part of NURF complex. Expressed in several structures, including head\; pharyngeal-intestinal valve\; pharynx\; tail\; and vulva. Human …
WBGene00010923	rle-1	10869.5	N.A.	Enables ubiquitin-protein transferase activity. Involved in determination of adult lifespan\; response to heat\; and ubiquitin-dependent protein catabolic process. Predicted to be located in cytoplasmic stress granule. Expressed in several structures, including intestine. Is an ortholog of human RC3H1 (ring finger and CCCH-type domains 1).
WBGene00001263	emb-9	10861	emb-9 encodes the alpha-1 chain of Type IV basement membrane collagen most closely equivalent to human COL4A1 (OMIM:120130) on the basis of biological function\; EMB-9 forms heterotrimeric Type IV collagen with LET-2, the alpha-2-like chain, and is required for the assembly and\/or secretion of LET-2\; EMB-9 is essential for embryonic morphogenesis, particularly epidermal elongation, and for larv…	Predicted to be an extracellular matrix structural constituent conferring tensile strength. Involved in several processes, including positive regulation of axon regeneration\; positive regulation of protein secretion\; and response to serotonin. Located in basement membrane. Expressed in several structures, including coelomocyte\; egg-laying apparatus\; gonad\; nerve ring\; and rectal muscle. Hum…
WBGene00000376	ccr-4	10854.3	N.A.	Predicted to enable 3'-5'-RNA exonuclease activity. Involved in nuclear-transcribed mRNA poly(A) tail shortening. Located in cytoplasm. Part of CCR4-NOT complex. Expressed in body wall musculature\; germ line\; neurons\; somatic cell\; and in male. Is an ortholog of human CNOT6 (CCR4-NOT transcription complex subunit 6) and CNOT6L (CCR4-NOT transcription complex subunit 6 like).
WBGene00003992	pgl-1	10823.5	pgl-1 encodes a predicted RNA-binding protein that contains a number of C-terminal RGG box motifs\; PGL-1 activity is required at high temperatures during midlarval to adult stages for postembryonic germline development and hence fertility, and also for proper formation of the germline-specific P granules\; PGL-1 protein, supplied maternally and embryonically, is a constitutive P granule componen…	Enables RNA endonuclease activity and identical protein binding activity. Involved in P granule organization and germ-line stem cell division. Located in P granule. Expressed in germ line.
WBGene00015418	pac-1	10814.4	pac-1 encodes a RhoGAP (Rho guanosine triphosphatase (GTPase) activating protein)\; in the embryo, PAC-1 is essential for establishment of radial (inner-outer) asymmetry and specifically, for differential localization of PAR-6, PAR-3, and PKC-3 to outer somatic cell surfaces devoid of cell-cell contacts\; in regulating PAR protein localization, PAC-1 appears to act by spatially regulating activit…	Enables GTPase activator activity. Involved in protein localization\; regulation of gastrulation\; and small GTPase-mediated signal transduction. Located in cell junction. Expressed in anus\; epithelial cell\; hypodermis\; pharynx\; and pm7. Is an ortholog of human ARHGAP23 (Rho GTPase activating protein 23).
WBGene00003962	pdi-1	10810.5	pdi-1 encodes a protein disulfide isomerase\; loss of function mutations in pdi-1 result in no obvious abnormalities, but animals triply mutant for three C. elegans PDI's, encoded by pdi-1, pdi-2, and pdi-3, display embryonic lethality characterized by loss of vermiform morphology after elongation, suggesting that the pdi genes function redundantly in embryonic morphogenesis\; PDI-1 exhibits prot…	Enables protein disulfide isomerase activity and protein-glutamine gamma-glutamyltransferase activity. Involved in IRE1-mediated unfolded protein response. Predicted to be located in endoplasmic reticulum. Expressed in hypodermis. Human ortholog(s) of this gene implicated in Cole-Carpenter syndrome. Is an ortholog of human P4HB (prolyl 4-hydroxylase subunit beta).
WBGene00003154	mcm-2	10808.6	N.A.	Predicted to enable single-stranded DNA binding activity. Predicted to contribute to 3'-5' DNA helicase activity and single-stranded DNA helicase activity. Predicted to be involved in double-strand break repair via break-induced replication and mitotic DNA replication initiation. Located in condensed chromosome and pronucleus. Expressed in excretory cell\; intestine\; and uterus. Human ortholog(s…
WBGene00006994	zyg-9	10699.2	zyg-9 encodes a predicted microtubule-association protein (MAP) of the XMAP215 family\; during early embryonic development, maternal zyg-9 activity is required for microtubule-dependent processes such as meiotic and mitotic spindle organization and pronuclear migration\; further, zyg-9 is essential for formation of long astral microtubules\; ZYG-9 is required for centrosomal localization of TAC-1…	Predicted to enable microtubule binding activity and microtubule plus end polymerase. Involved in embryo development\; meiotic spindle organization\; and spindle elongation. Located in kinetochore and microtubule cytoskeleton. Is an ortholog of human CKAP5 (cytoskeleton associated protein 5).
WBGene00003210	mel-28	10696.6	mel-28 encodes a large (1,784-residue) protein required for nuclearenvelope assembly\; MEL-28 is highly divergent from, but orthologous tohuman AT-hook-containing transcription factor 1 (AHCTF1)\; MEL-28 isfound in nuclear pore complexes (NPCs) during interphase, kinetochoresearly in mitosis, and chromatin later in mitosis\; mel-28 mutants werefirst identified in a screen for genes involved in ce…	Enables molecular adaptor activity. Involved in mitotic sister chromatid segregation and nuclear pore complex assembly. Located in kinetochore\; nuclear envelope\; and nucleoplasm. Part of nuclear pore.
WBGene00002000	hrpr-1	10679.6	N.A.	Predicted to enable mRNA binding activity. Located in nucleus. Expressed widely. Is an ortholog of human HNRNPR (heterogeneous nuclear ribonucleoprotein R) and SYNCRIP (synaptotagmin binding cytoplasmic RNA interacting protein).
WBGene00020915	nol-58	10679.2	N.A.	Predicted to enable snoRNA binding activity. Predicted to be involved in ribosome biogenesis. Predicted to be located in nucleolus. Predicted to be part of box C\/D methylation guide snoRNP complex and small-subunit processome. Is an ortholog of human NOP58 (NOP58 ribonucleoprotein).
WBGene00003964	pdi-3	10669.7	pdi-3 encodes a protein disulfide isomerase (PDI) required for normal cuticle collagen deposition and, subliminally, for maintenance of normal body shape\; PDI-3 has both PDI and calcium-dependent transglutaminase activity in vitro, crosslinking proteins through a gamma-glutamyl epsilon-lysine dual residue\; PDI-3 is homologous to the human PDI ERp60, as well as a homolog in the dog heartworm Dir…	Enables protein disulfide isomerase activity and protein-glutamine gamma-glutamyltransferase activity. Involved in several processes, including collagen and cuticulin-based cuticle development\; egg-laying behavior\; and male anatomical structure morphogenesis. Predicted to be located in endoplasmic reticulum. Expressed in hypodermis\; intestine\; and seam cell. Human ortholog(s) of this gene imp…
WBGene00001685	gpd-3	10646.6	gpd-3 encodes a predicted glyceraldehyde 3-phosphate dehydrogenase that affects embryonic viability\; GPD-3 interacts with LIN-2 in two-hybrid assays.	Predicted to enable glyceraldehyde-3-phosphate dehydrogenase (NAD+) (phosphorylating) activity. Predicted to be involved in glycolytic process. Predicted to be located in cytosol. Expressed in several structures, including gonad\; intestine\; and pharynx. Human ortholog(s) of this gene implicated in Alzheimer's disease and lymphangioleiomyomatosis. Is an ortholog of human GAPDH (glyceraldehyde-3-…
WBGene00004313	rbc-1	10631.7	rbc-1 encodes an ortholog of S. cerevisiae RAV1\; like RAV1, RBC-1 may berequired for the reassociation of vacuolar proton-translocating ATPase(V-ATPase) after temporary glucose starvation.	Predicted to be involved in vacuolar acidification. Predicted to be part of RAVE complex. Expressed in several structures, including cuticle\; neurons\; ventral nerve cord\; vm1\; and vulva. Human ortholog(s) of this gene implicated in autosomal dominant nonsyndromic deafness 71 and developmental and epileptic encephalopathy 81. Is an ortholog of human DMXL1 (Dmx like 1) and DMXL2 (Dmx like 2).
WBGene00018764	azin-1	10606.5	N.A.	Predicted to enable catalytic activity. Predicted to be involved in polyamine biosynthetic process. Predicted to be located in cytoplasm.
WBGene00001393	fat-1	10555.3	fat-1 encodes an omega-3 fatty acyl desaturase that acts onsubstrates of 16-20 carbons with a preference for omega-6 fatty acids\;FAT-1 dehydrogenates its substrates 3 carbons from the methyl terminus\;FAT-1 is required in vivo for n3 polyunsaturated fatty acid (PUFA)synthesis\; the fatty acids of fat-1(wa9) mutants consist of 20\%arachidonic acid (20:4n6), instead of the 20\% eicosapentaenoic ac…	Predicted to enable oxidoreductase activity. Involved in positive regulation of locomotion and unsaturated fatty acid biosynthetic process. Predicted to be located in membrane. Expressed in intestine\; nerve ring\; and touch receptor neurons. Used to study alcohol use disorder.
WBGene00010012	saeg-1	10552.9	N.A.	Predicted to enable transcription corepressor activity. Predicted to be involved in negative regulation of DNA-templated transcription and regulation of transcription by RNA polymerase II. Located in nucleus. Is an ortholog of human MIDEAS (mitotic deacetylase associated SANT domain protein)\; TRERF1 (transcriptional regulating factor 1)\; and ZNF541 (zinc finger protein 541).
WBGene00000670	col-95	10534.3	col-95 encodes a collagen.	Predicted to be a structural constituent of cuticle. Predicted to be located in membrane. Predicted to be part of collagen trimer.
WBGene00012753	nssp-36	10468.4	N.A.	Enriched in neurons and somatic gonad precursor based on tiling array\; RNA-seq\; single-cell RNA-seq\; and microarray studies. Is affected by several genes including cyc-1\; qui-1\; and etr-1 based on microarray and RNA-seq studies. Is affected by seven chemicals including rotenone\; multi-walled carbon nanotube\; and D-glucose based on RNA-seq and microarray studies.
WBGene00003739	nlp-1	10460.1	nlp-1 encodes a predicted neuropeptide-like protein of the MSFamide family with similarity to Aplysia californica (sea hare) buccalin, a neuropeptide that regulates acetylcholine-induced muscle contraction\; NLP-1 is expressed in the phasmid PHB tail sensory neuron, lateral neurons, head neurons, and the intestine\; the precise role of NLP-1 in nervous system function and development is not yet k…	Involved in cellular response to carbon dioxide\; negative regulation of nematode pharyngeal pumping\; and thigmotaxis. Expressed in intestine\; lateral ganglion\; and neurons.
WBGene00013307	melo-1	10436.5	N.A.	Predicted to enable RNA binding activity. Predicted to be involved in negative regulation of gene expression, epigenetic and protein localization to heterochromatin. Predicted to be located in nucleoplasm. Is an ortholog of human PPHLN1 (periphilin 1).
WBGene00020496	spat-3	10434.9	spat-3 encodes, by transcription from alternative promoters, two large(1092- and 2471-residues) proteins\; while residues 162-228 of the largerSPAT-3 protein encode a Ring1 type of zinc-finger domain (like that seenin SEX COMBS EXTRA, an E3 ubiquitin-protein ligase RING1 protein ofDrosophila melanogaster), the bulk of SPAT-3 has no obvious similaritiesto other proteins\; consistent with its predi…	Enables histone ubiquitin ligase activity. Involved in several processes, including negative regulation of gene expression, epigenetic\; negative regulation of vulval development\; and nematode male tail tip morphogenesis. Predicted to be part of PcG protein complex and ubiquitin ligase complex. Expressed in several structures, including AIYL\; AIYR\; SMDDL\; and SMDDR. Used to study developmenta…
WBGene00001620	glt-1	10417.8	glt-1 encodes a predicted plasma membrane glutamate transporter that is functional when expressed in Xenopus oocytes\; expressed in the M3 pharyngeal neuron, the male tail, some anterior hypodermal cells, and in cells in the terminal bulb of the pharynx.	Enables L-glutamate transmembrane transporter activity. Predicted to be involved in L-glutamate transmembrane transport. Located in cell projection. Expressed in body wall musculature\; cephalic sheath cell\; hypodermis\; and muscle cell. Human ortholog(s) of this gene implicated in Huntington's disease\; amyotrophic lateral sclerosis\; and developmental and epileptic encephalopathy 41. Is an ort…
WBGene00001598	glh-1	10403.9	glh-1 encodes a putative DEAD-box RNA helicase that contains four CCHC zinc fingers and is homologous to Drosophila VASA, a germ-line-specific, ATP-dependent RNA helicase\; at permissive temperature, GLH-1 is required redundantly with GLH-4 for proper germ-line development and fertility, specifically for regulating the normal extent of germ-line proliferation, oogenesis, and the production of fun…	Enables DEAD\/H-box RNA helicase binding activity\; JUN kinase binding activity\; and RNA helicase activity. Involved in germ cell development and post-embryonic development. Located in P granule. Expressed in germ line and gonad. Is an ortholog of human DDX4 (DEAD-box helicase 4).
WBGene00001081	dpy-22	10402.4	dpy-22 encodes a broadly expressed protein, homologous to the human transcriptional mediator protein TRAP230, which is involved in WNT and RAS signaling, as well as in dosage compensation\; DPY-22 has a C-terminal glutamine-rich domain that is dispensable for inhibition of RAS-dependent cell differentiation, but is required for inhibition of BAR-1-dependent gene expression.	Predicted to enable transcription coactivator activity. Involved in negative regulation of epidermal growth factor receptor signaling pathway and negative regulation of vulval development. Located in nucleus. Expressed in several structures, including hypodermal cell\; intestine\; pharynx\; and vulva. Human ortholog(s) of this gene implicated in several diseases, including X-linked recessive dise…
WBGene00002008	hsp-4	10364.5	hsp-4 encodes one of two C. elegans heat shock response 70 (hsp70) proteins homologous to mammalian grp78\/BiP (glucose regulated protein 78\/immunoglobulin heavy chain-binding protein, OMIM:138120)\; hsp-4 affects embryonic and larval viability\; hsp-4 is expressed in several tissues including the hypodermis, intestine, and spermatheca\; hsp-4 transcription is upregulated in response to endoplas…	Enables RNA polymerase II-specific DNA-binding transcription factor binding activity. Involved in endoplasmic reticulum unfolded protein response. Located in rough endoplasmic reticulum. Expressed in PVDL\; PVDR\; intestinal muscle\; and spermatheca. Human ortholog(s) of this gene implicated in several diseases, including dopamine beta-hydroxylase deficiency\; inflammatory bowel disease\; and rhe…
WBGene00004166	scc-2	10342.5	pqn-85 encodes an ortholog of budding yeast Scc2p, Drosophila NIPPED-B,and human NIPBL (OMIM:608667, mutated in Cornelia de Lange syndrome)that is required for resistance to double-stranded DNA breakage\; PQN-85is also required, with MAU-2 and SCC-3, for normal chromosomesegregation and embryonic viability\; pqn-85(RNAi) induceshypersensitivity to double-stranded breaks in DNA (manifested byabnor…	Enables cohesin loader activity. Involved in several processes, including chromosome organization\; double-strand break repair involved in meiotic recombination\; and regulation of cell cycle process. Located in chromosome and nucleus. Human ortholog(s) of this gene implicated in Cornelia de Lange syndrome 1. Is an ortholog of human NIPBL (NIPBL cohesin loading factor).
WBGene00023209	ZC513.7	10338.3	N.A.	Enriched in several structures, including OLQshDL\; coelomocyte\; germ line\; hermaphrodite gonad\; and hypodermis based on RNA-seq\; single-cell RNA-seq\; and microarray studies. Is affected by several genes including nuo-6\; atfs-1\; and etr-1 based on microarray\; tiling array\; and RNA-seq studies. Is affected by fifteen chemicals including 1-methylnicotinamide\; rotenone\; and Alovudine base…
WBGene00007009	wwp-1	10308.8	wwp-1 encodes, by alternative splicing, two isoforms of a putative E3 ubiquitin ligase orthologous to budding yeast Rsp5, Drosophila SU(DX), and human WWP1 (OMIM:602307) and WWP2 (OMIM:602308)\; WWP-1 is required for proteolysis of the intracellular LIN-12 domain in primary ventral precursor cells, and for protection of germ cells against ionizing radiation or camptothecin, as well as for normal …	Enables ubiquitin conjugating enzyme activity. Involved in defense response to bacterium\; protein ubiquitination\; and regulation of protein catabolic process. Acts upstream of or within determination of adult lifespan. Located in cytoplasm. Expressed in GABAergic neurons\; cholinergic neurons\; coelomocyte\; somatic neurons\; and vulval muscle. Is an ortholog of human WWP1 (WW domain containing…
WBGene00013709	csnk-1	10302.1	N.A.	Predicted to enable protein serine\/threonine kinase activity. Involved in several processes, including first cell cycle pseudocleavage\; regulation of mitotic spindle elongation\; and spindle localization. Located in aster\; cell cortex\; and plasma membrane. Expressed in several structures, including head neurons\; intestine\; pharynx\; somatic nervous system\; and vulval muscle. Is an ortholog…
WBGene00009661	patr-1	10294.6	patr-1 encodes the C. elegans ortholog of the Saccharomyces cerevisiae decapping activator Pat1p\; patr-1 is involved in decapping-mediated mRNA decay and is required for proper recruitment of several components of P-bodies, cytoplasmic mRNA processing bodies\; in C. elegans, patr-1 is an essential gene, required for embryonic and larval development, as well as wild-type brood sizes\; PATR-1 loca…	Predicted to enable RNA binding activity. Involved in determination of adult lifespan. Located in P-body. Is an ortholog of human PATL1 (PAT1 homolog 1, processing body mRNA decay factor) and PATL2 (PAT1 homolog 2).
WBGene00000482	chd-3	10292.4	chd-3 encodes a PHD-finger SNF2 family member containing a chromo domain and a C-terminal helicase domain that affects Notch-dependent vulval development\; expressed in virtually all embryonic cells and in many larval nuclei.	Predicted to enable several functions, including ATP hydrolysis activity\; ATP-dependent activity, acting on DNA\; and histone binding activity. Involved in cell fate determination\; negative regulation of Ras protein signal transduction\; and negative regulation of vulval development. Predicted to be located in chromatin and nucleus. Predicted to be part of NuRD complex. Expressed in several str…
WBGene00021681	Y48G1C.8	10281.9	N.A.	Enriched in several structures, including ABplpapapa\; NSM\; germ line\; mechanosensory neurons\; and rectal epithelial cell based on microarray\; RNA-seq\; and single-cell RNA-seq studies. Is affected by several genes including cyc-1\; nuo-6\; and atfs-1 based on microarray\; RNA-seq\; tiling array\; and proteomic studies. Is affected by eight chemicals including rotenone\; Zidovudine\; and para…
WBGene00006975	zfp-1	10245.6	zfp-1 encodes a leucine zipper, zinc finger, and PHD\/LAP domain (plant homeodomain\/leukemia-associated protein)-containing protein homologous to human AF10 (OMIM:602409, which is involved in chromosomal translocations associated with acute leukemia)\; loss of zfp-1 activity via RNA-mediated interference (RNAi) results in suppression of RNAi, suggesting that ZFP-1 plays a role in gene silencing\…	Enables chromatin binding activity and methylated histone binding activity. Involved in regulatory ncRNA-mediated post-transcriptional gene silencing. Located in condensed chromosome and nucleus. Part of histone methyltransferase complex. Expressed in several structures, including germ line\; intestine\; oocyte\; pharynx\; and seam cell. Human ortholog(s) of this gene implicated in acute monocyti…
WBGene00001937	his-63	10239.3	his-63 encodes an H3 histone\; by homology, HIS-63 is predicted to function as a nucleosome component required for packaging of DNA into chromatin\; his-63 is a replication-dependent histone locus.	Predicted to enable DNA binding activity and protein heterodimerization activity. Predicted to be a structural constituent of chromatin. Predicted to be part of nucleosome. Is an ortholog of several human genes including H3C1 (H3 clustered histone 1)\; H3C3 (H3 clustered histone 3)\; and H3C4 (H3 clustered histone 4).
WBGene00004239	puf-3	10227.7	The puf-3 gene encodes a predicted RNA binding protein that is a member of the conserved PUF (Pumilio and FBF) family of RNA binding proteins\; PUF-3 is expressed in the ovary and is required for multiple aspects of early embryogenesis including proper cell cycle timing, spindle positioning, and formation of the polar bodies and pronuclei.	Enables mRNA 3'-UTR binding activity. Predicted to be involved in post-transcriptional regulation of gene expression. Predicted to be located in cytoplasm and nucleus. Expressed in germ line.
WBGene00000673	col-98	10221.9	N.A.	Predicted to be a structural constituent of cuticle. Predicted to be located in membrane. Predicted to be part of collagen trimer.
WBGene00004739	scd-1	10219.7	scd-1 encodes a novel protein with several regions that are extremely glutamine (Q) rich, interspersed with other residues (usually alanine)\; SCD-1 affects signalling by proteins in the DAF-7\/transforming growth factor (TGF)-beta pathway (DAF-1, DAF-8, and DAF-14), and the Q-rich regions of SCD-1 protein may mediate epigenetic changes of stably heritable tertiary conformation.	Enriched in several structures, including ABalppppppa\; head mesodermal cell\; neurons\; oocyte\; and pharyngeal cell based on Chronogram\; microarray\; RNA-seq\; tiling array\; and single-cell RNA-seq studies. Is affected by several genes including cyc-1\; etr-1\; and isp-1 based on microarray\; tiling array\; RNA-seq\; and proteomic studies. Is affected by nineteen chemicals including 1-methyln…
WBGene00016002	gyf-1	10215.1	N.A.	Predicted to be located in cytosol. Human ortholog(s) of this gene implicated in Parkinson's disease. Is an ortholog of human GIGYF2 (GRB10 interacting GYF protein 2).
WBGene00018849	spt-16	10203.4	N.A.	Predicted to enable nucleosome binding activity. Involved in nematode pharynx development\; positive regulation of chromosome segregation\; and regulation of embryonic development. Located in nucleus. Expressed in several structures, including intestine. Human ortholog(s) of this gene implicated in neurodevelopmental disorder with dysmorphic facies and thin corpus callosum. Is an ortholog of huma…
WBGene00002202	kin-19	10181.4	kin-19 encodes a serine\/threonine kinase orthologous to Casein Kinase I (CKI)\; in the early embryo, kin-19 is a component of both the non-canonical Wnt signaling pathway that regulates endoderm formation in the early embryo as well as the Wnt spindle orientation pathway\; during larval development, kin-19 functions in a non-canonical Wnt signaling pathway to control asymmetric division and fate…	Predicted to enable protein serine\/threonine kinase activity. Involved in Wnt signaling pathway, regulating spindle positioning and positive regulation of proteasomal ubiquitin-dependent protein catabolic process. Located in centrosome\; cytoplasm\; and nucleus. Expressed in several structures, including BDU\; marginal cell\; seam cell\; tail\; and vulva. Human ortholog(s) of this gene implicate…
WBGene00022599	daf-41	10173.6	N.A.	Predicted to enable Hsp90 protein binding activity and protein-folding chaperone binding activity. Predicted to be involved in chaperone-mediated protein complex assembly and protein folding. Located in myofibril. Part of protein folding chaperone complex. Expressed in several structures, including amphid neurons\; anal depressor muscle\; phasmid neurons\; touch receptor neurons\; and vulva. Huma…
WBGene00020762	zer-1	10171.9	zer-1 encodes a protein that contains a VHL (von Hippel-Lindau)-box motif and is a member of the ZYG11 family of ubiquitin ligase substrate recognition subunits\; ZER-1 interacts with the CUL-2 cullin in vivo and modestly enhances the lethality produced by a temperature-sensitive allele of zyg-11\; in yeast two-hybrid assays, ZER-1 interacts with CUL-2 and additionally with SKR-1 and ELC-1.	Part of Cul2-RING ubiquitin ligase complex. Is an ortholog of human ZER1 (zyg-11 related cell cycle regulator).
WBGene00013394	ule-5	10154.3	N.A.	Enriched in cephalic sheath cell\; germ line\; hermaphrodite gonad\; and neurons based on proteomic\; tiling array\; RNA-seq\; and single-cell RNA-seq studies. Is affected by several genes including nuo-6\; mut-16\; and atx-3 based on microarray\; proteomic\; tiling array\; and RNA-seq studies. Is affected by twenty-two chemicals including Heme\; ethanol\; and rotenone based on microarray\; RNA-s…
WBGene00012354	cox-4	10153.2	W09C5.8 encodes the C. elegans ortholog of the cytochrome c oxidase (COX) subunit IV (COX IV)\; loss of W09C5.8 activity via RNAi results in a shortened life span, reduced fertility, and defects in mitochondrial respiratory chain function.	Predicted to enable oxidoreductase activity. Involved in mitochondrial electron transport, cytochrome c to oxygen. Predicted to be located in mitochondrial inner membrane. Predicted to be part of respiratory chain complex IV. Human ortholog(s) of this gene implicated in mitochondrial complex IV deficiency nuclear type 16. Is an ortholog of human COX4I1 (cytochrome c oxidase subunit 4I1) and COX4I…
WBGene00007458	ule-4	10137.3	N.A.	Predicted to be located in extracellular region.
WBGene00018152	acs-4	10116.6	N.A.	Predicted to enable long-chain fatty acid-CoA ligase activity. Predicted to be involved in long-chain fatty acid metabolic process\; long-chain fatty-acyl-CoA metabolic process\; and neuron differentiation. Located in lipid droplet. Expressed in gonadal sheath cell\; hypodermis\; intestine\; pharynx\; and somatic nervous system. Human ortholog(s) of this gene implicated in several diseases, inclu…
WBGene00003955	pcn-1	10090.3	pcn-1 encodes the C. elegans ortholog of proliferating cell nuclear antigen (PCNA), an acidic protein that is an essential component of the DNA replication and repair machinery and serves as a processivity factor for DNA polymerase delta\; PCN-1 is required for early embryogenesis and for proper germ-line development, and directly interacts with CKI-2, a cyclin-dependent kinase inhibitor homolog …	Enables DNA polymerase binding activity. Involved in positive regulation of DNA repair and positive regulation of DNA replication. Located in nucleus. Expressed in Z2 and Z3. Human ortholog(s) of this gene implicated in several diseases, including Lewy body dementia\; ataxia-telangiectasia-like disorder-2\; and kidney cancer (multiple). Is an ortholog of human PCNA (proliferating cell nuclear ant…
WBGene00003865	oma-2	10070.3	oma-2 encodes a zinc finger protein of the TIS11 finger type that is paralogous to OMA-1\; while either oma-1 or oma-2 individually have no obvious mutant phenotype, oma-1 and oma-2 doubly mutant animals show defects in oocyte maturation, indicating that the two genes function redundantly in this process\; whereas normal oocytes are released from meiotic prophase I arrest during oocyte maturation…	Enables mRNA regulatory element binding translation repressor activity. Involved in several processes, including oocyte development\; regulation of protein metabolic process\; and regulation of reproductive process. Located in P granule and centrosome. Expressed in several structures, including germ line\; head muscle\; intestine\; oocyte\; and somatic nervous system. Is an ortholog of human ZFP3…
WBGene00002073	ima-2	10040.6	ima-2 encodes one of three C. elegans importin alpha proteins\; IMA-2 is predicted to function as an adaptor protein that regulates import of nuclear proteins\; during development, ima-2 activity is required for normal germline and embryonic mitoses, specifically for proper chromosome segregration and nuclear reassembly\; IMA-2 expression is detected in germ cells, oocytes, and early embryonic ce…	Enables nuclear import signal receptor activity. Involved in several processes, including meiotic sister chromatid cohesion\; mitotic nuclear membrane reassembly\; and protein import into nucleus. Located in cytoplasm and nuclear envelope. Expressed in Z2\; Z3\; and germ line. Is an ortholog of human KPNA2 (karyopherin subunit alpha 2) and KPNA7 (karyopherin subunit alpha 7).
WBGene00005015	spt-5	10028.4	N.A.	Predicted to enable mRNA binding activity. Predicted to be involved in transcription elongation by RNA polymerase II. Located in euchromatin. Expressed in several structures, including head and tail. Is an ortholog of human SUPT5H (SPT5 homolog, DSIF elongation factor subunit).
WBGene00006787	unc-52	10001.9	The unc-52 gene encodes perlecan, a protein orthologous to human basement membrane-specific heparan sulfate proteoglycan core protein (HSPG2\; OMIM:142461, which when mutated leads to Schwartz-Jampel syndrome or dyssegmental dysplasia)\; UNC-52 plays essential roles in muscle structure development and regulation of growth factor-like signaling pathways\; UNC-52 is synthesized by the hypodermis an…	An extracellular matrix structural constituent. Involved in several processes, including hemidesmosome assembly\; muscle cell cellular homeostasis\; and muscle structure development. Located in basement membrane and striated muscle dense body. Expressed in alimentary muscle\; body wall musculature\; gonad\; and pharyngeal-intestinal valve. Human ortholog(s) of this gene implicated in several dise…
WBGene00000396	cdh-4	9995.84	cdh-4 encodes a Fat-like cadherin homolog\; CDH-4 is required for axon fasciculation, cell migration, and hypodermis and pharyngeal development\; in addition, CDH-4 functions together with the FMI-1 flamingo-like cadherin to regulate development of the GABAergic VD motorneurons\; cdh-4 is widely expressed beginning early in development, but by the L3 larval stage expression is confined to the VD …	Predicted to enable calcium ion binding activity. Predicted to be involved in homophilic cell adhesion via plasma membrane adhesion molecules. Predicted to be located in membrane. Expressed in several structures, including QL\; QR\; VD neuron\; non-striated muscle\; and rectal gland cell. Human ortholog(s) of this gene implicated in carcinoma (multiple)\; colorectal cancer\; and spinocerebellar a…
WBGene00010665	rml-1	9992.54	N.A.	Enables UTP:glucose-1-phosphate uridylyltransferase activity. Involved in UDP-alpha-D-glucose metabolic process. Located in endoplasmic reticulum\; sarcomere\; and striated muscle dense body. Human ortholog(s) of this gene implicated in developmental and epileptic encephalopathy 83. Is an ortholog of human UGP2 (UDP-glucose pyrophosphorylase 2).
WBGene00021857	iffb-1	9992.33	N.A.	Predicted to enable translation initiation factor activity. Predicted to be involved in translational initiation. Predicted to be located in cytoplasm. Is an ortholog of human EIF5B (eukaryotic translation initiation factor 5B).
WBGene00006911	vha-2	9977.56	vha-2 and vha-3 encode an ortholog of subunit c of the membrane-bound(V0) domain of vacuolar proton-translocating ATPase (V-ATPase)\; theprotein encoded by vha-2 and vha-3 (VHA-2\/3) is identical\; VHA-2\/3 is apredicted V-ATPase transmembrane rotor component, whose polypeptidesequence is identical to that of VHA-3\; VHA-1 and VHA-2\/3 comprise aclosely related family of subunit c co-orthologs, p…	Predicted to enable proton-transporting ATPase activity, rotational mechanism. Predicted to be involved in proton transmembrane transport. Predicted to be located in membrane. Predicted to be part of vacuolar proton-transporting V-type ATPase, V0 domain. Expressed in excretory cell and rectum. Human ortholog(s) of this gene implicated in early-onset epilepsy 3 and thyroid gland carcinoma. Is an o…
WBGene00022518	zfh-2	9977.3	zfh-2 is a homeobox gene of the ZF (zinc finger class)\; it encodes three homeodomains and encodes at last 15 zinc fingers\; the ZF class is subdivided into several families\; zfh-2 belongs to the Zfhx family and is orthologous to Drosophila zfh-2, and the three paralogous human genes ZFHX2, ZFHX3, and ZFHX4 (zinc finger homeobox 2, 3, 4)\; zfh-2 is involved in hermaphrodite genitalia development…	Predicted to enable DNA-binding transcription factor activity, RNA polymerase II-specific and RNA polymerase II cis-regulatory region sequence-specific DNA binding activity. Predicted to be involved in regulation of transcription by RNA polymerase II. Predicted to be located in nucleus. Expressed in body wall musculature\; enteric muscle\; nerve ring\; neurons\; and vulval muscle. Used to study o…
WBGene00011273	R53.4	9948.67	R53.4 encodes a mitochondrial ATP synthase subunit f homolog\; R53.4 is predicated to be a member of the F(1)F(0)ATP synthase required for ATP synthesis\; R53.4 is also required for expression of antimicrobial peptides in response to infection.	Predicted to contribute to proton-transporting ATP synthase activity, rotational mechanism. Predicted to be involved in proton motive force-driven mitochondrial ATP synthesis. Predicted to be located in mitochondrial membrane. Predicted to be part of proton-transporting ATP synthase complex. Is an ortholog of human ATP5MF (ATP synthase membrane subunit f).
WBGene00003218	mep-1	9835.78	mep-1 encodes a zinc-finger protein\; mep-1 is required for oocyte development and for maintenance of somatic versus germline differentiation\; mep-1 is involved in posttranscriptional repression of the fem-3 mRNA via its 3' UTR in vivo and is also more broadly required for larval development\; MEP-1 interacts with MOG-1, MOG-4, and MOG-5 and binds RNA nonspecifically\; MEP-1 is a nuclear protein.	Enables RNA binding activity\; enzyme binding activity\; and identical protein binding activity. Involved in developmental process involved in reproduction\; positive regulation of gene expression\; and vulval development. Located in nucleus. Expressed in anchor cell\; embryonic cell\; excretory cell\; germ line\; and somatic nervous system.
WBGene00006742	unc-2	9827.68	unc-2 encodes a calcium channel alpha subunit similar to the human P\/Q-type calcium channel, CACNA1A\; unc-2 is required for desensitization to dopamine, normal movement, normally low sensitivity of whole animals to serotonin, and neuronal migrations\; unc-2 interacts with the TGF beta pathway to regulate movement, and maintain normal serotonin levels\; unc-2\/TGF beta pathway is also required f…	Predicted to enable voltage-gated calcium channel activity. Involved in several processes, including determination of left\/right asymmetry in nervous system\; negative regulation of transforming growth factor beta receptor signaling pathway\; and response to stress. Located in presynaptic active zone membrane. Expressed in several structures, including body wall musculature\; excretory canal\; n…
WBGene00016603	met-1	9752.48	met-1 encodes a histone methyltransferase whose SET domain is similar to that of Saccharomyces cerevisiae Set2p\; loss of met-1 activity in the background of a mutant class A synMuv gene, such as lin-15A, results in a multivulval phenotype, indicating that met-1 acts to negatively regulate vulval cell fate specification\; as met-1 is required for normal levels of histone H3K36 and H3K9 trimethyla…	Enables histone H3K36 methyltransferase activity. Involved in negative regulation of transcription by RNA polymerase II and negative regulation of vulval development. Predicted to be located in chromatin and nucleus. Expressed in hypodermis\; intestine\; and muscle cell. Human ortholog(s) of this gene implicated in several diseases, including clear cell renal cell carcinoma\; gastrointestinal sys…
WBGene00012226	W03G11.4	9743.7	N.A.	Enriched in several structures, including XXX cell\; accessory cell\; distal tip cell\; neurons\; and pharyngeal cell based on microarray\; tiling array\; RNA-seq\; and single-cell RNA-seq studies. Is affected by several genes including cyc-1\; qui-1\; and atfs-1 based on microarray\; tiling array\; and RNA-seq studies. Is affected by eighteen chemicals including 1-methylnicotinamide\; bisphenol …
WBGene00000485	che-3	9725.7	che-3 encodes a dynein heavy chain (DHC) 1b isoform that affects the establishment and maintainance of the structural integrity of sensory cilia, and that also has a role in intraflagellar transport\; CHE-3 is expressed in ciliated sensory neurons.	Predicted to enable dynein intermediate chain binding activity\; dynein light intermediate chain binding activity\; and minus-end-directed microtubule motor activity. Involved in several processes, including dauer entry\; non-motile cilium assembly\; and positive regulation of dauer larval development. Located in non-motile cilium. Expressed in I4 neuron\; PDEL\; PDER\; and nerve ring. Human orth…
WBGene00000776	cpl-1	9722.05	cpl-1 encodes a member of the cathepsin L-like cysteine protease family required for embryonic viability and normal growth\; expressed in eggshells and throughout early embryos, accumulates in intestinal cells during late embryogenesis, and expressed in the cuticle, gonad, and pharynx later in development.	Predicted to enable cysteine-type endopeptidase activator activity involved in apoptotic process and cysteine-type endopeptidase activity. Involved in several processes, including lipid droplet disassembly\; positive regulation of vitellogenesis\; and regulation of apoptosis involved in tissue homeostasis. Located in several cellular components, including lysosome\; vesicle lumen\; and yolk granu…
WBGene00002264	lec-1	9721.83	lec-1 encodes a tandem repeat-type galectin in which each galectin domain is homologous to typical vertebrate 14-kDa-type galectins\; the two sugar binding sites have distinct sugar binding properties in vitro and lec-1 is expressed most abundantly in the adult cuticle.	Enables galactoside binding activity. Located in collagen and cuticulin-based cuticle extracellular matrix. Is an ortholog of human LGALS9 (galectin 9) and LGALS9B (galectin 9B).
WBGene00004392	rnr-2	9627.66	rnr-2 encodes the small subunit of ribonucleotide reductase\; by homology, RNR-2 is predicted to function in deoxyribonucleotide biosynthesis\; in C. elegans rnr-2 is an essential gene whose activity is required for reproduction and embryonic development.	Predicted to enable ribonucleoside-diphosphate reductase activity, thioredoxin disulfide as acceptor. Involved in embryo development. Predicted to be located in cytosol. Expressed in gonad. Human ortholog(s) of this gene implicated in several diseases, including autosomal dominant progressive external ophthalmoplegia with mitochondrial DNA deletions 5\; lung non-small cell carcinoma\; and mitocho…
WBGene00003785	nos-3	9604.27	nos-3 encodes a homolog of Drosophila NANOS that physically interacts with FBF-1 (similar, though not orthologous, to Drosophila PUMILIO)\; NOS-3 is required in development of the hermaphrodite germ-line to promote the switch from sperm to oocyte production, perhaps by forming a complex with FBF-1 that controls fem-3 mRNA.	Predicted to enable RNA binding activity and zinc ion binding activity. Involved in mRNA stabilization and positive regulation of meiotic nuclear division. Located in cytoplasm. Expressed in several structures, including Psub3\; Psub4\; Z2\; Z3\; and germ line.
WBGene00010221	F57G12.1	9601.8	N.A.	Enriched in several structures, including anchor cell\; body wall musculature\; intestine\; neurons\; and rectal muscle based on tiling array\; RNA-seq\; single-cell RNA-seq\; and microarray studies. Is affected by several genes including cyc-1\; cua-1\; and nuo-6 based on microarray\; tiling array\; and RNA-seq studies. Is affected by seventeen chemicals including 1-methylnicotinamide\; Alovudin…
WBGene00012553	cox-5A	9573.79	cco-2 encodes the C. elegans ortholog of the cytochrome c oxidase (COX) subunit Va (COX Va)\; loss of cco-2 activity via RNAi results in a shortened life span, reduced fertility, and defects in mitochondrial respiratory chain function.	Predicted to enable metal ion binding activity. Involved in mitochondrial electron transport, cytochrome c to oxygen. Predicted to be located in mitochondrial inner membrane. Predicted to be part of respiratory chain complex IV. Human ortholog(s) of this gene implicated in mitochondrial complex IV deficiency nuclear type 20. Is an ortholog of human COX5A (cytochrome c oxidase subunit 5A).
WBGene00008205	sams-1	9568.61	sams-1 encodes an S-adenosyl methionine synthetase\; by homology, SAMS-1 is predicted to function as a methyl-group donor in many biochemical reactions\; sams-1 expression levels are negatively regulated by dietary restriction (as seen in eat-2 mutant animals), suggesting that increased lifespan due to dietary restriction is due, in part, to reducing the activity of key metabolic enzymes\; loss o…	Enables methionine adenosyltransferase activity. Involved in S-adenosylmethionine biosynthetic process and negative regulation of lipid storage. Predicted to be located in cytosol. Expressed in body wall musculature\; dorsal nerve cord\; and ventral nerve cord. Used to study lipid metabolism disorder. Human ortholog(s) of this gene implicated in hypermethioninemia and lung cancer. Is an ortholog …
WBGene00008682	lex-1	9557.09	lex-1 encodes a protein that contains an ATPase domain and a bromodomain and is similar to Saccharomyces cerevisiae Yta7p which is involved in maintaining euchromatin-heterochromatin boundaries\; lex-1 functions, together with tam-1, to positively regulate expression of repetitive sequences, such as those found in multicopy transgenes\; in addition, like tam-1, lex-1 functions as a class B synthe…	Predicted to enable ATP hydrolysis activity\; chromatin binding activity\; and histone binding activity. Involved in regulation of heterochromatin formation. Predicted to be located in nucleus. Is an ortholog of human ATAD2 (ATPase family AAA domain containing 2) and ATAD2B (ATPase family AAA domain containing 2B).
WBGene00001130	dyn-1	9556.71	dyn-1 encodes the C. elegans ortholog of the dynamin GTPase\; dyn-1 activity is required for endocytosis, synaptic vesicle recycling, cytokinesis, and the CED-1 pathway that regulates engulfment and degradation of apoptotic cells\; mutations in dyn-1 affect locomotion, egg-laying, defecation, and embryonic development, indicating that dyn-1's endocytic function is required for a number of diverse…	Enables GTPase activity. Involved in several processes, including embryo development\; endocytosis\; and necroptotic process. Located in several cellular components, including plasma membrane\; plasma membrane bounded cell projection\; and spindle microtubule. Expressed in several structures, including neurons\; non-striated muscle\; pharyngeal-intestinal valve\; rectal valve cell\; and somatic n…
WBGene00010621	egg-6	9533.13	egg-6 encodes an extracellular leucine-rich repeat protein\; egg-6 is required for proper organization of the apical extracellular matrix.	Predicted to be located in apical plasma membrane. Expressed in excretory system\; neurons\; pharynx\; rectal epithelial cell\; and vulva.
WBGene00001745	gsa-1	9520.09	The gsa-1 gene encodes a Gs alpha subunit of heterotrimeric G proteins which affects L1 larval stage viability, movement, and egg laying\; it is genetically upstream of sgs-1 with respect to neuronal degeneration, as defined by gain-of-function analysis, and is expressed in excitable cells.	Predicted to enable G protein-coupled receptor binding activity\; G-protein beta\/gamma-subunit complex binding activity\; and GTPase activity. Involved in several processes, including nematode pharyngeal pumping\; oocyte growth\; and positive regulation of oocyte maturation. Predicted to be located in cytoplasm. Predicted to be part of heterotrimeric G-protein complex. Expressed in several struc…
WBGene00003905	pad-1	9493.59	The pad-1 gene encodes a highly conserved, but unfamiliar, protein that is required for embryonic development.	Predicted to be involved in Golgi to endosome transport and protein transport. Predicted to be located in endosome and trans-Golgi network. Expressed in head and tail. Used to study Down syndrome. Is an ortholog of human DOP1A (DOP1 leucine zipper like protein A) and DOP1B (DOP1 leucine zipper like protein B).
WBGene00016114	flp-27	9491.84	N.A.	Predicted to be involved in neuropeptide signaling pathway. Predicted to be located in extracellular region.
WBGene00004438	rpl-23A.1	9478.06	rpl-25.1 encodes a large ribosomal subunit L23a protein.	Predicted to be a structural constituent of ribosome. Predicted to be involved in translation. Predicted to be located in ribosome. Predicted to be part of cytosolic large ribosomal subunit. Is an ortholog of human RPL23A (ribosomal protein L23a).
WBGene00003002	lin-13	9474.6	lin-13 encodes a large (2248-residue) nuclear protein with multiple zinc fingers of the C2H2 class and a LXCXE retinoblastoma protein-binding motif, that is required for survival through larval development and for negative regulation of vulval fates during postembryonic development.	Predicted to enable DNA binding activity and zinc ion binding activity. Involved in negative regulation of vulval development. Located in nucleus. Expressed in several structures, including body wall musculature\; hermaphrodite distal tip cell\; hypodermal cell\; intestine\; and neurons.
WBGene00015514	srlf-1	9414.28	C06A8.3 encodes, along with ZK970.7, one of two C. elegans proteins with similarity to the Onchocerca volvulus Ov17 hypodermal antigen.	Enriched in several structures, including ciliated neurons\; egg-laying apparatus\; hypodermis\; interfacial epithelial cell\; and somatic nervous system based on Chronogram\; proteomic\; single-cell RNA-seq\; and RNA-seq studies. Is affected by several genes including myrf-1\; nuo-6\; and htz-1 based on proteomic\; microarray\; and RNA-seq studies. Is affected by twenty-one chemicals including r…
WBGene00011428	nlp-80	9405.99	N.A.	Predicted to be involved in neuropeptide signaling pathway.
WBGene00001560	gei-3	9376.54	gei-3 encodes a member of the high mobility group (HMG) protein family\; interacts with GEX-3 in yeast two-hybrid assays.	Predicted to enable DNA-binding transcription factor activity, RNA polymerase II-specific and RNA polymerase II transcription regulatory region sequence-specific DNA binding activity. Predicted to be involved in regulation of transcription by RNA polymerase II. Predicted to be located in nucleus. Expressed in head neurons\; intestine\; and tail neurons. Human ortholog(s) of this gene implicated i…
WBGene00009587	mig-38	9346.94	N.A.	Predicted to enable copper ion binding activity\; primary methylamine oxidase activity\; and quinone binding activity. Predicted to be involved in amine metabolic process. Predicted to be located in cytoplasm and nucleus. Expressed in gonad\; head\; neurons\; somatic gonad precursor\; and tail.
WBGene00003789	npp-3	9328.34	npp-3 encodes a nucleoporin that is a homolog of vertebrate Nup205\; npp-3 is required for normal nuclear pore complex distribution in the nuclear envelope, nuclear exclusion of large non-nuclear macromolecules, chromatin condensation, proper mitotic spindle orientation, early embryonic viability, body integrity, and locomotion.	Predicted to be a structural constituent of nuclear pore. Involved in several processes, including establishment of localization in cell\; positive regulation of nematode male tail tip morphogenesis\; and regulation of cell cycle. Predicted to be located in nucleus. Predicted to be part of nuclear pore inner ring. Expressed in embryonic cell. Human ortholog(s) of this gene implicated in nephrotic…
WBGene00018285	smk-1	9317.58	smk-1 encodes a novel, evolutionarily conserved protein that is orthologous to the mammalian and Dictyostelium discoideum SMEK (suppressor of MEK null) proteins\; smk-1 activity is essential for several aspects of DAF-16-mediated longevity namely, the defense response to pathogenic bacteria and increased resistance to oxidative and UV-induced damage\; in regulating DAF-16 activity, SMK-1 appears …	Predicted to enable protein phosphatase activator activity. Involved in negative regulation of mitotic DNA damage checkpoint\; response to radiation\; and response to stress. Located in nucleus. Expressed in hypodermis\; intestine\; and tail. Is an ortholog of human PPP4R3A (protein phosphatase 4 regulatory subunit 3A) and PPP4R3B (protein phosphatase 4 regulatory subunit 3B).
WBGene00012776	Y42A5A.1	9300.88	N.A.	Predicted to enable metalloaminopeptidase activity\; peptide binding activity\; and zinc ion binding activity. Predicted to be involved in peptide catabolic process and proteolysis. Predicted to be located in cytoplasm\; extracellular space\; and membrane. Is an ortholog of human TRHDE (thyrotropin releasing hormone degrading enzyme).
WBGene00044936	T24H7.6	9281.77	N.A.	Enriched in AFD based on RNA-seq studies. Is affected by several genes including etr-1\; hpl-2\; and spc-1 based on tiling array and RNA-seq studies.
WBGene00009065	F22G12.5	9271.38	N.A.	Predicted to enable guanyl-nucleotide exchange factor activity. Predicted to be involved in regulation of Rho protein signal transduction. Expressed in spermatheca and uterine toroidal epithelial cell. Is an ortholog of human DOCK11 (dedicator of cytokinesis 11).
WBGene00001747	gsp-1	9264.98	N.A.	Predicted to enable protein serine\/threonine phosphatase activity. Involved in negative regulation of protein phosphorylation and positive regulation of gene expression. Predicted to be located in cytoplasm and nucleus. Expressed in oocyte. Human ortholog(s) of this gene implicated in Noonan syndrome-like disorder with loose anagen hair 2. Is an ortholog of human PPP1CB (protein phosphatase 1 ca…
WBGene00002583	let-363	9218.29	N.A.	Enables protein serine\/threonine kinase activity. Involved in several processes, including box C\/D snoRNP assembly\; determination of adult lifespan\; and regulation of gene expression. Located in cytoplasm. Part of TORC1 complex and TORC2 complex. Expressed in several structures, including intestine\; muscle cell\; neurons\; pharynx\; and vulva. Human ortholog(s) of this gene implicated in sev…
WBGene00002980	lgg-1	9172.65	lgg-1 encodes the C. elegans ortholog of Saccharomyces cerevisiae Atg8p and mammalian MAP-LC3\; by homology, LGG-1 is predicted to be required for the degradation of cellular components by autophagy\; loss of lgg-1 function via RNAi indicates that, like several other C. elegans genes involved in autophagy, lgg-1 is essential for normal dauer morphogenesis and life-span extension\; a GFP::LGG-1 re…	Predicted to enable GABA receptor binding activity\; phosphatidylethanolamine binding activity\; and ubiquitin protein ligase binding activity. Involved in several processes, including dauer larval development\; positive regulation of autophagosome assembly\; and response to stress. Located in bounding membrane of organelle\; neuron projection\; and neuronal cell body. Expressed in several struct…
WBGene00006406	srgp-1	9152.53	srgp-1 encodes the ortholog of the mammalian srGAP proteins, which are downstream effectors of the Slit-Robo neuronal guidance pathway and act as negative regulators of neuronal migration\; srgp-1 positively regulates cell-cell adhesion during embryonic development and is required along with catenins, hmp-1 and hmp-2 for viability\; srgp-1 also functions in engulfing cells to negatively regulate …	Enables GTPase activator activity and small GTPase binding activity. Involved in negative regulation of cell migration\; negative regulation of phagocytosis, engulfment\; and regulation of cell-cell adhesion. Located in adherens junction and cell cortex. Expressed in hypodermis\; nerve ring\; somatic cell\; and spermatheca. Human ortholog(s) of this gene implicated in papillary thyroid carcinoma.…
WBGene00016326	ubr-1	9145.79	N.A.	Enables ubiquitin conjugating enzyme binding activity. Involved in negative regulation of glutamate metabolic process and regulation of backward locomotion. Predicted to be located in cytoplasm. Predicted to be part of ubiquitin ligase complex. Expressed in body wall musculature\; lateral ganglion\; pharynx\; and seam cell. Human ortholog(s) of this gene implicated in Johanson-Blizzard syndrome a…
WBGene00018426	F44E7.4	9144.61	N.A.	Predicted to enable metalloendopeptidase activity. Predicted to be involved in peptide catabolic process and proteolysis involved in protein catabolic process. Predicted to be located in cytosol and mitochondrion. Expressed in gonad. Human ortholog(s) of this gene implicated in Alzheimer's disease\; diabetic encephalopathy\; and type 2 diabetes mellitus. Is an ortholog of human IDE (insulin degra…
WBGene00006755	unc-16	9104.57	unc-16 encodes a homolog of murine JIP3 (c-Jun N-terminal kinase (JNK)-interacting protein 3) and Drosophila SUNDAY DRIVER\; unc-16 is involved in vesicle transport and mutations affect egg laying, locomotion, and defecation\; UNC-16 physically interacts with JNK and JNK kinases, with the KLC-2 kinesin light chain, and the DLI-1 dynein light intermediate chain\; UNC-16 is expressed in neurons of …	Enables kinase binding activity\; kinesin binding activity\; and signaling adaptor activity. Involved in several processes, including defecation\; egg-laying behavior\; and regulation of JNK cascade. Located in axon\; cell body\; and cytoplasm. Expressed in body wall musculature\; hypodermis\; intestine\; and nervous system. Human ortholog(s) of this gene implicated in endometrial cancer\; hepato…
WBGene00001941	his-67	9103.81	his-67 encodes an H4 histone required for embryonic viability and growth.	Predicted to enable DNA binding activity and protein heterodimerization activity. Predicted to be a structural constituent of chromatin. Involved in positive regulation of transcription by RNA polymerase II. Is an ortholog of several human genes including H4C1 (H4 clustered histone 1)\; H4C4 (H4 clustered histone 4)\; and H4C9 (H4 clustered histone 9).
WBGene00002244	laf-1	9082.42	laf-1 encodes a DEAD-box RNA helicase\; laf-1 is required for embryonic development and sex determination\; laf-1 was identified in screens for dominant suppressors of the sterility produced by gain-of-function fem-3 mutations\; when homozygous, laf-1 mutations result in embryonic and larval lethality and when heterozygous, feminization of XX and XO animals\; reporter gene analyses indicate that …	Enables RNA strand annealing activity\; identical protein binding activity\; and molecular condensate scaffold activity. Involved in several processes, including masculinization of hermaphroditic germ-line\; positive regulation of embryonic development\; and positive regulation of fertilization. Located in P granule. Expressed in germ line. Human ortholog(s) of this gene implicated in colorectal …
WBGene00001840	hel-1	9081.91	hel-1 encodes an ortholog of human 56-kD U2AF65 associated protein (UAP56)that is required for exporting mRNAs from the nucleus\; unlike animals withRNAi against several other splicing factors, hel-1(RNAi) animals fail toexport transgenic GFP mRNA from the nucleus\; conversely, hel-1overexpression is lethal, with failed transgene expression as well.	Enables RNA polymerase II-specific DNA-binding transcription factor binding activity. Involved in determination of adult lifespan\; nuclear mRNA surveillance\; and positive regulation of gene expression. Located in nucleus. Part of transcription regulator complex. Expressed in hypodermis\; intestine\; and neurons. Human ortholog(s) of this gene implicated in type 1 diabetes mellitus. Is an orthol…
WBGene00000668	col-93	9072.02	N.A.	Predicted to be a structural constituent of cuticle. Predicted to be located in membrane. Predicted to be part of collagen trimer.
WBGene00021486	lbp-9	9048.05	N.A.	Predicted to enable fatty acid binding activity. Predicted to be involved in fatty acid transport. Predicted to be located in cytosol and nucleus. Human ortholog(s) of this gene implicated in pre-eclampsia. Is an ortholog of human FABP4 (fatty acid binding protein 4).
WBGene00007752	wdfy-3	9047.53	N.A.	Predicted to enable zinc ion binding activity. Human ortholog(s) of this gene implicated in primary autosomal dominant microcephaly 18. Is an ortholog of human WDFY3 (WD repeat and FYVE domain containing 3).
WBGene00006920	vha-11	9041.13	vha-11 encodes, by alternative splicing, two isoforms of an ortholog ofsubunit C of the cytoplasmic (V1) domain of vacuolarproton-translocating ATPase (V-ATPase)\; VHA-11 is a predicted cytosolicstator (stalk) component\; VHA-11 is found in dot-like structures aroundembryonic nuclei, with diffuse distribution in embryonic cytoplasm\; inlater embryos (comma stage onward), VHA-11 is found in gut gr…	Predicted to enable proton-transporting ATPase activity, rotational mechanism. Involved in embryo development and ovulation. Predicted to be located in cytoplasm and membrane. Predicted to be part of vacuolar proton-transporting V-type ATPase, V1 domain. Expressed in excretory cell\; hypodermis\; and intestinal cell. Human ortholog(s) of this gene implicated in oral squamous cell carcinoma and st…
WBGene00000380	cct-5	9012.32	cct-5 encodes, by alternative splicing, two isoforms of a putative epsilon subunit of the eukaryotic cytosolic ('T complex') chaperonin, orthologous to human CCT5 (OMIM:610150, mutated in sensory neuropathy with spastic paraplegia)\; CCT-5 represses SKN-1-dependent transcription of gst-4\; in mass RNAi assays, cct-5 is required for normal embryonic osmotic integrity, transgene subcellular localiz…	Predicted to enable unfolded protein binding activity. Predicted to be involved in protein folding. Part of chaperonin-containing T-complex. Is an ortholog of human CCT5 (chaperonin containing TCP1 subunit 5).
WBGene00007877	nfki-1	8988.51	N.A.	Predicted to be involved in positive regulation of cell differentiation and regulation of transcription by RNA polymerase II. Expressed in several structures, including nervous system. Is an ortholog of human NFKBIZ (NFKB inhibitor zeta).
WBGene00011352	rskn-1	8967.6	N.A.	Predicted to enable ribosomal protein S6 kinase activity. Predicted to be involved in TORC1 signaling. Predicted to be located in cytoplasm and nucleoplasm. Human ortholog(s) of this gene implicated in Coffin-Lowry syndrome and non-syndromic X-linked intellectual disability 19. Is an ortholog of several human genes including RPS6KA1 (ribosomal protein S6 kinase A1)\; RPS6KA2 (ribosomal protein S6…
WBGene00009574	tmem-184	8917.03	N.A.	Predicted to enable transmembrane transporter activity. Predicted to be involved in transmembrane transport. Predicted to be located in membrane. Expressed in several structures, including egg-laying apparatus\; nervous system\; pharyngeal-intestinal valve\; rectal valve cell\; and tail hypodermis. Is an ortholog of human TMEM184B (transmembrane protein 184B).
WBGene00000998	dig-1	8905.6	dig-1 encodes a giant member of the immunoglobulin superfamily\; dig-1 functions cell non-autonomously to mediate axon fasciculation and maintenance of cell body position within ganglia\; dig-1 is also required for proper placement of the gonad\; dig-1 is initially expressed in the developing embryonic gut and then expressed by a number of different muscle cells, including the body wall, head, vu…	Predicted to enable calcium ion binding activity. Expressed in several structures, including GLR\; body wall musculature\; head mesodermal cell\; male sex myoblast\; and non-striated muscle.
WBGene00004443	rpl-29	8905.11	rpl-29 encodes a large ribosomal subunit L29 protein\; by homology, RPL-29 is predicted to function in protein biosynthesis\; in C. elegans, loss of rpl-29 function via RNA-mediated interference (RNAi) does not result in any obvious abnormalities.	Predicted to be a structural constituent of ribosome. Predicted to be involved in cytoplasmic translation. Predicted to be located in ribosome. Predicted to be part of cytosolic large ribosomal subunit. Is an ortholog of human RPL29 (ribosomal protein L29).
WBGene00000377	cct-1	8895.31	cct-1 encodes a putative alpha subunit of the eukaryotic cytosolic ('T complex') chaperonin, orthologous to human TCP1 (OMIM:186980), and required for normal pronuclear-centrosome rotation, positioning of the mitotic spindle, meiosis, and distal tip cell migration\; CCT-1 is also required to repress SKN-1-dependent transcription of gst-4, and for fertility and viability\; CCT-1 is expressed in la…	Predicted to enable unfolded protein binding activity. Predicted to be involved in protein folding. Located in nucleus. Part of chaperonin-containing T-complex. Expressed in nerve ring and in male. Is an ortholog of human TCP1 (t-complex 1).
WBGene00006771	tln-1	8888.33	N.A.	Predicted to enable integrin binding activity. Involved in negative regulation of epidermal growth factor receptor signaling pathway\; regulation of vulval development\; and vulval cell fate specification. Located in basement membrane\; contractile muscle fiber\; and lateral plasma membrane. Expressed in several structures, including Psub4\; Z2\; Z3\; distal tip cell\; and vulval cell. Is an orth…
WBGene00001855	hil-4	8887.73	N.A.	Predicted to enable double-stranded DNA binding activity and nucleosomal DNA binding activity. Predicted to be involved in chromosome condensation and negative regulation of DNA recombination. Predicted to be located in nucleus. Predicted to be part of nucleosome. Expressed in several structures, including somatic cell. Human ortholog(s) of this gene implicated in acute lymphoblastic leukemia. Is…
WBGene00004804	skn-1	8881.67	skn-1 encodes a bZip transcription factor orthologous to the mammalian Nrf (Nuclear factor-erythroid-related factor) transcription factors\; during early embryogenesis, maternally provided SKN-1 is required for specification of the EMS blastomere, a mesendodermal precursor that gives rise to pharyngeal, muscle, and intestinal cells\; later, during postembryonic development, SKN-1 functions in the…	Enables Hsp70 protein binding activity and RNA polymerase II cis-regulatory region sequence-specific DNA binding activity. Involved in several processes, including endoderm development\; positive regulation of macromolecule biosynthetic process\; and response to stress. Located in endoplasmic reticulum\; mitochondrion\; and nucleus. Expressed in several structures, including germ line\; head gang…
WBGene00004258	pyc-1	8878.83	pyc-1 encodes the C. elegans pyruvate carboxylase ortholog\; by homology, PYC-1 is predicted to function as a key regulatory enzyme of gluconeogenesis, lipogenesis, and anaplerosis, localizing to the mitochondrial matrix and catalyzing the formation of oxaloacetate from pyruvate and carbonate\; pyc-1 expression is induced upon exposure of C. elegans to cadmium.	Predicted to enable pyruvate carboxylase activity. Predicted to be involved in gluconeogenesis and pyruvate metabolic process. Located in mitochondrion. Used to study pyruvate decarboxylase deficiency. Human ortholog(s) of this gene implicated in pyruvate carboxylase deficiency disease. Is an ortholog of human PC (pyruvate carboxylase).
WBGene00003423	msi-1	8871.79	N.A.	Enables mRNA binding activity. Involved in nervous system process. Located in cytoplasm. Expressed in SMDVL\; head neurons\; and intestine. Is an ortholog of human MSI1 (musashi RNA binding protein 1) and MSI2 (musashi RNA binding protein 2).
WBGene00001037	dnj-19	8871.42	This gene encodes a protein containing a DnaJ ('J') domain.	Predicted to enable protein-folding chaperone binding activity. Involved in response to topologically incorrect protein. Predicted to be located in cytosol. Is an ortholog of human DNAJA2 (DnaJ heat shock protein family (Hsp40) member A2).
WBGene00011436	T04F3.1	8858.81	N.A.	Predicted to enable transaminase activity. Predicted to be involved in amino acid metabolic process. Is an ortholog of human ACCS (1-aminocyclopropane-1-carboxylate synthase homolog (inactive)) and ACCSL (1-aminocyclopropane-1-carboxylate synthase homolog (inactive) like).
WBGene00008914	nssp-64	8825.5	N.A.	Expressed in AIYL and AIYR.
WBGene00002295	let-19	8821.64	The let-19 gene encodes a protein related to human TRAP240 (thyroid hormone receptor-associated protein 240, OMIM:300182), a transcriptional co-activation complex subunit conserved in yeast, Drosophila, and humans\; LET-19 is required for proper asymmetric cell divisions and cell fusions regulated by LIN-44\/Wnt and LIN-17\/frizzled, as well as for proper development of secondary vulval cell fate…	Predicted to enable transcription coactivator activity. Predicted to be involved in positive regulation of transcription by RNA polymerase II. Predicted to be located in nucleus. Predicted to be part of mediator complex. Expressed in several structures, including TL.a\; TL.p\; TR.a\; TR.p\; and seam cell. Human ortholog(s) of this gene implicated in autosomal dominant intellectual developmental d…
WBGene00001684	gpd-2	8814.97	gpd-2 encodes one of four C. elegans glyceraldehyde-3-phosphate dehydrogenases (GAPDHs)\; by homology, GPD-2 is predicted to reversibly catalyze the oxidation and phosphorylation of glyceraldehyde-3-phosphate to 1,3-diphosphoglycerate during glycolysis\; in C. elegans, GPD-2 and GPD-3 constitute the major GAPDH isoenzymes and are expressed at highest levels during postembryonic development, prima…	Predicted to enable glyceraldehyde-3-phosphate dehydrogenase (NAD+) (phosphorylating) activity. Predicted to be involved in glycolytic process. Predicted to be located in cytosol. Expressed in several structures, including AB\; Psub1\; and head. Human ortholog(s) of this gene implicated in Alzheimer's disease and lymphangioleiomyomatosis. Is an ortholog of human GAPDH (glyceraldehyde-3-phosphate …
WBGene00003410	mrp-4	8812.48	mrp-4 encodes a putative member of subfamily C of the ATP-binding cassette transporters\; MRP-4 is required, redundantly with its paralog WHT-2, for sperm to normally migrate towards a PUFA-based signal exuded by oocytes\; hermaphrodites subjected to double wht-2(RNAi) mrp-4(RNAi) are infertile, both through aberrant loss of their own sperm and through failure of males to effectively inseminate t…	Predicted to enable ATPase-coupled transmembrane transporter activity. Involved in lipid transport involved in lipid storage and lysosome organization. Located in endocytic vesicle and gut granule.
WBGene00004874	smc-4	8783.68	The smc-4 gene encodes a homolog of the SMC4 subunit of mitotic condensin\; SMC-4 acts with MIX-1 to enable chromosome segregation.	Predicted to enable ATP binding activity and ATP hydrolysis activity. Involved in mitotic sister chromatid segregation and positive regulation of nematode male tail tip morphogenesis. Located in chromosome, centromeric region and condensed chromosome. Part of condensin complex. Expressed in head\; linker cell\; and tail. Is an ortholog of human SMC4 (structural maintenance of chromosomes 4).
WBGene00017121	cyc-2.1	8770.14	cyc-2.1 encodes, along with cyc-2.2, one of two C. elegans cytochrome c proteins\; the product of cyc-2.1 is predicted to function in the electron transport chain by transferring electrons from respiratory chain Complex III to Complex IV\; large-scale RNAi screens indicate the cyc-2.1 activity is required for embryonic and larval development as well as for normal brood sizes and growth rates.	Enables electron transfer activity. Involved in electron transport chain. Predicted to be located in mitochondrial intermembrane space. Predicted to be part of respiratory chain complex. Expressed in body wall musculature\; excretory cell\; intestinal cell\; nervous system\; and pharynx. Human ortholog(s) of this gene implicated in several diseases, including Huntington's disease\; carcinoma (mul…
WBGene00003242	mig-6	8764.64	mig-6 encodes at least two protein isoforms (long and short) that are highly similar to the extracellular matrix proteins papilin and lacunin\; mig-6 is an essential gene required for embryonic hypodermal cell enclosure and normal excretory canal cell function in L1 larvae\; MIG-6(S) activity is required cell nonautonomously for the ventral to dorsal phase of distal tip cell (DTC) migration and a…	Predicted to enable serine-type endopeptidase inhibitor activity. Involved in several processes, including anatomical structure morphogenesis\; distal tip cell migration\; and nematode larval development. Located in basement membrane. Expressed in several structures, including CAN\; GLR\; basal lamina\; enteric muscle\; and somatic gonad precursor. Is an ortholog of human PAPLN (papilin, proteogl…
WBGene00009454	F36A2.7	8754.02	N.A.	Predicted to be located in membrane. Expressed in several structures, including pharynx and spermatheca.
WBGene00004897	snb-1	8746.01	The snb-1 gene encodes synaptobrevin, a synaptic vesicle protein orthologous to human vesicle-associated membrane protein 1 (VAMP1 OMIM:185880) and 2 (VAMP2 OMIM:185881), and is required for viability and synaptic transmission\; SNB-1 is likely to play a role in vesicle docking and\/or fusion and is expressed in neurons where it colocalizes with synaptic vesicle proteins RAB-3 and synaptotagmin.	Predicted to enable SNAP receptor activity and syntaxin binding activity. Involved in several processes, including chemical synaptic transmission\; defecation\; and regulation of hindgut contraction. Located in several cellular components, including axon\; presynaptic active zone\; and secretory vesicle. Expressed in several structures, including AIY\; CAN\; excretory gland cell\; somatic nervous…
WBGene00002107	ins-24	8733.49	ins-24 encodes an insulin-like peptide of the insulin superfamily of proteins (OMIM:176730, 147440)\; INS-24 is one of 38 insulin-like peptides in C. elegans, but as loss of INS-24 function via RNA-mediated interference does not result in any abnormalities, the precise role of INS-24 in C. elegans development is not yet clear.	Predicted to enable hormone activity. Predicted to be involved in signal transduction. Predicted to be located in extracellular region.
WBGene00003229	mex-3	8731.41	mex-3 encodes two KH domain-containing RNA binding proteins\; in the early embryo, maternally provided MEX-3 is required for specifying the identities of the anterior AB blastomere and its descendants, as well as for the identity of the P3 blastomere and proper segregation of the germline P granules\; mex-3 mRNA is distributed uniformly in the syncytial core of the adult distal gonad, mature oocy…	Enables single-stranded RNA binding activity. Involved in several processes, including negative regulation of muscle cell differentiation\; organelle inheritance\; and regulation of gene expression. Located in P granule. Expressed in distal tip cell and embryonic cell. Is an ortholog of human MEX3A (mex-3 RNA binding family member A) and MEX3B (mex-3 RNA binding family member B).
WBGene00001856	hil-5	8728	N.A.	Predicted to enable double-stranded DNA binding activity and nucleosomal DNA binding activity. Predicted to be involved in chromosome condensation and negative regulation of DNA recombination. Predicted to be located in nucleus. Predicted to be part of nucleosome. Expressed widely. Human ortholog(s) of this gene implicated in acute lymphoblastic leukemia. Is an ortholog of human H1-8 (H1.8 linker…
WBGene00010013	F54B3.1	8673.89	N.A.	Predicted to be located in peroxisome. Human ortholog(s) of this gene implicated in developmental and epileptic encephalopathy 18. Is an ortholog of human SZT2 (SZT2 subunit of KICSTOR complex).
WBGene00007646	nkb-1	8656.86	N.A.	Predicted to enable ATPase activator activity. Predicted to be involved in intracellular monoatomic cation homeostasis and monoatomic cation transmembrane transport. Predicted to be located in plasma membrane. Predicted to be part of sodium:potassium-exchanging ATPase complex. Expressed in neurons and non-striated muscle. Human ortholog(s) of this gene implicated in several diseases, including at…
WBGene00010908	imph-1	8654.91	The protein product of this gene is predicted to contain a glutamine\/asparagine (Q\/N)-rich ('prion') domain, by the algorithm of Michelitsch and Weissman (as of the WS77 release of WormBase, i.e., in wormpep77).	Predicted to enable mRNA 3'-UTR binding activity. Predicted to be involved in nervous system development and regulation of gene expression. Predicted to be located in cytosol and nucleus. Expressed in tail. Human ortholog(s) of this gene implicated in type 2 diabetes mellitus. Is an ortholog of human IGF2BP1 (insulin like growth factor 2 mRNA binding protein 1)\; IGF2BP2 (insulin like growth fact…
WBGene00018837	F54G2.1	8634.77	N.A.	Predicted to be involved in exocytosis. Predicted to be located in secretory vesicle. Human ortholog(s) of this gene implicated in familial hemophagocytic lymphohistiocytosis 3. Is an ortholog of human BAIAP3 (BAI1 associated protein 3) and UNC13D (unc-13 homolog D).
WBGene00004453	rpl-39	8627.64	rpl-39 encodes a large ribosomal subunit L39 protein.	Predicted to be a structural constituent of ribosome. Predicted to be involved in translation. Predicted to be located in ribosome. Predicted to be part of cytosolic large ribosomal subunit. Is an ortholog of human RPL39 (ribosomal protein L39) and RPL39P5 (ribosomal protein L39 pseudogene 5).
WBGene00000230	atp-3	8618.43	atp-3 encodes the C. elegans homolog of the ATP5O subunit of mitochondrial ATP synthase (complex V)\; as part of the ATP synthase complex, ATP-3 controls respiration and regulates growth rate and body size, aging, and rates of behaviors such as pharyngeal pumping, defecation, and locomotion\; loss of atp-3 function during larval development indicates that respiratory rates established during deve…	Predicted to contribute to proton-transporting ATP synthase activity, rotational mechanism. Involved in determination of adult lifespan and proton motive force-driven mitochondrial ATP synthesis. Predicted to be located in membrane and mitochondrion. Human ortholog(s) of this gene implicated in Alzheimer's disease\; clear cell renal cell carcinoma\; and mitochondrial complex V (ATP synthase) defi…
WBGene00003918	par-3	8617.13	par-3 encodes a PDZ domain-containing protein orthologous to mammalian atypical PKC isotype-specific interacting protein (ASIP) and Drosophila Bazooka\; PAR-3 is required maternally for polarization of the zygote along the anterior-posterior (A-P) axis\; PAR-3, PAR-6, and PKC-3 form a complex that localizes to the anterior cytoplasmic cortex of the one- and two-cell embryo\; this localization is …	Predicted to enable phosphatidylinositol binding activity. Involved in several processes, including establishment of mitotic spindle orientation\; gonad development\; and polarity specification of anterior\/posterior axis. Located in several cellular components, including P granule\; basal part of cell\; and cell cortex. Is extrinsic component of cytoplasmic side of plasma membrane. Expressed in …
WBGene00001187	egl-19	8595.14	egl-19 encodes the pore-forming alpha1 subunit of a voltage-gated calcium channel orthologous to the alpha subunit of mammalian L-type calcium ion channels\; EGL-19 carries L-type currents in pharyngeal and body wall muscle, and its activity is essential and required for muscle contraction during late embryonic morphogenesis, locomotion, egg laying, mating and feeding\; recordings of voltage-depe…	Enables voltage-gated calcium channel activity. Involved in several processes, including determination of left\/right asymmetry in nervous system\; positive regulation of striated muscle contraction\; and regulation of nematode pharyngeal pumping. Located in plasma membrane. Expressed in several structures, including alimentary muscle\; neurons\; preanal ganglion\; tail\; and vulval muscle. Used …
WBGene00011156	rbm-3.2	8572.66	N.A.	Predicted to enable RNA binding activity.
WBGene00010406	math-33	8570.33	N.A.	Enables RNA polymerase II-specific DNA-binding transcription factor binding activity and cysteine-type deubiquitinase activity. Involved in several processes, including anterior\/posterior axis specification, embryo\; hemidesmosome assembly\; and maintenance of centrosome location. Located in cytoplasm and nucleus. Expressed in several structures, including germ cell and germ line. Is an ortholog…
WBGene00010061	F54E12.2	8540.75	N.A.	Predicted to enable ATP-dependent activity, acting on DNA. Predicted to be involved in DNA repair. Predicted to be located in nucleus. Is an ortholog of human TTF2 (transcription termination factor 2).
WBGene00004728	sax-2	8532.52	sax-2 encodes a conserved protein that contains HEAT\/Armadillo repeats and is related to Drosophila furry\; sax-2 activity is required for maintaining normal neuronal morphology, particularly proper neurite outgrowth and termination\; sax-2 activity is also required for normal male mating behavior and gonad morphogenesis in both sexes\; a sax-2 reporter gene fusion indicates that sax-2 is expres…	Involved in neuron projection development. Predicted to be located in cell cortex and site of polarized growth. Expressed in head neurons\; tail neurons\; and ventral nerve cord. Is an ortholog of human FRY (FRY microtubule binding protein) and FRYL (FRY like transcription coactivator).
WBGene00018963	ucr-1	8529.05	N.A.	Predicted to enable metal ion binding activity. Located in mitochondrion. Human ortholog(s) of this gene implicated in Alzheimer's disease. Is an ortholog of human UQCRC1 (ubiquinol-cytochrome c reductase core protein 1).
WBGene00000474	cey-3	8524.12	cey-3 encodes a protein with a cold-shock\/Y-box domain\; CEY-3 associates with CGH-1, CEY-2, and CEY-4 in cytoplasmic particles of the gonad and early embryo.	Enables ribonucleoprotein complex binding activity. Predicted to be involved in regulation of gene expression. Part of ribonucleoprotein complex. Expressed in germ cell\; head muscle\; intestine\; somatic cell\; and somatic nervous system. Used to study Huntington's disease.
WBGene00015790	C15C7.4	8513.05	N.A.	Enriched in anchor cell and neurons based on tiling array\; RNA-seq\; and single-cell RNA-seq studies. Is affected by several genes including cyc-1\; nuo-6\; and numr-2 based on microarray\; RNA-seq\; and proteomic studies. Is affected by ten chemicals including aldicarb\; multi-walled carbon nanotube\; and Sodium Chloride based on microarray and RNA-seq studies.
WBGene00022119	copa-1	8504.24	Y71F9AL.17 encodes an alpha subunit of the coatomer (COPI) complex\; in mass RNAi assays, Y71F9AL.17 is required for embryonic viability, fertility, normal locomotion, and normally rapid growth.	Predicted to enable structural molecule activity. Predicted to be involved in Golgi vesicle transport and intracellular protein transport. Predicted to be located in COPI-coated vesicle membrane and Golgi membrane. Predicted to be part of COPI vesicle coat. Expressed in distal tip cell and head. Human ortholog(s) of this gene implicated in autoimmune interstitial lung, joint, and kidney disease. …
WBGene00009542	copb-2	8503.58	F38E11.5 encodes a beta' (beta-prime) subunit of the coatomer (COPI) complex\; in mass RNAi assays, F38E11.5 is required for fertility and general health.	Predicted to enable structural molecule activity. Involved in embryo development\; intracellular protein transport\; and oocyte development. Predicted to be located in COPI-coated vesicle membrane and Golgi membrane. Predicted to be part of COPI vesicle coat. Human ortholog(s) of this gene implicated in primary autosomal recessive microcephaly 19. Is an ortholog of human COPB2 (COPI coat complex …
WBGene00006888	vbh-1	8488.56	vbh-1 encodes a DEAD-box RNA helicase with similarity to Drosophila Vasa and Belle\; vbh-1 activity is required for the proper timing of the sperm-oocyte switch during germ line development\; vbh-1 also plays a role in embryonic development\; in regulating germ line development, vbh-1 appears to function at least partially redundantly with laf-1, which also encodes a DEAD-box RNA helicase\; VBH-1…	Predicted to enable RNA helicase activity and mRNA binding activity. Involved in developmental process involved in reproduction\; positive regulation of embryonic development\; and positive regulation of fertilization. Located in P granule and cytoplasmic stress granule. Expressed in several structures, including Z2\; Z3\; germ cell\; somatic cell\; and in male. Human ortholog(s) of this gene imp…
WBGene00004955	spd-5	8486.23	spd-5 encodes a coiled-coil domain protein\; spd-5 activity is required for centrosome maturation, symmetry breaking, pronuclear migration, mitotic spindle assembly, and cell division\; in regulating centrosome maturation, spd-5 interacts genetically with spd-2, which also encodes a coiled-coil protein\; SPD-5 physically interacts with CED-9, a C. elegans BCL2 ortholog and spd-5(RNAi) results in …	Enables identical protein binding activity and molecular condensate scaffold activity. Involved in microtubule cytoskeleton organization\; positive regulation of mitotic cell cycle, embryonic\; and protein localization to organelle. Located in centrosome and cytoplasm. Part of protein phosphatase type 2A complex.
WBGene00019124	F59E12.9	8474.31	N.A.	Enriched in several structures, including Q cell\; germ line\; hypodermis\; sensory neurons\; and somatic gonad precursor based on microarray and RNA-seq studies. Is affected by several genes including cua-1\; htz-1\; and atfs-1 based on RNA-seq and microarray studies. Is affected by fifteen chemicals including rotenone\; D-glucose\; and Alovudine based on RNA-seq\; proteomic\; and microarray stu…
WBGene00021281	ell-1	8474.24	N.A.	Predicted to enable cis-regulatory region sequence-specific DNA binding activity. Predicted to be involved in positive regulation of transcription elongation by RNA polymerase II and snRNA transcription by RNA polymerase II. Located in nucleus. Expressed in hypodermis\; intestine\; pharynx\; tail\; and vulva. Used to study cancer. Human ortholog(s) of this gene implicated in autosomal recessive n…
WBGene00003754	nlp-16	8466.27	nlp-16 encodes a predicted neuropeptide that does not belong to a multigene family in C. elegans and is not clearly related to well-characterized neuropeptides\; the peptide encoded by nlp-16 has been isolated from Ascaris suum.	Expressed in head neurons\; intestine\; and lateral ganglion.
WBGene00008999	myrf-2	8453.99	myrf-2 encodes a protein with a glutamine\/asparagine-rich domain, homologous to human MYRF (myelin regulatory factor)\; MYRF-2 contains a well-conserved paralog in the C. elegans genome, MYRF-1, encoded by F59B10.1.	Predicted to enable DNA-binding transcription factor activity and sequence-specific DNA binding activity. Involved in regulation of neuron remodeling and regulation of synapse assembly. Predicted to be located in endoplasmic reticulum membrane and nucleus. Predicted to be part of transcription regulator complex. Human ortholog(s) of this gene implicated in cerebral infarction\; congenital diaphra…
WBGene00020391	cct-7	8441.36	cct-7 encodes a putative eta subunit of the eukaryotic cytosolic ('T complex') chaperonin, orthologous to human CCT7 (OMIM:605140)\; CCT-7 is expressed in most, if not all, tissues\; in mass RNAi assays, CCT-7 is required for normal transgene repression and subcellular localization, embryonic and larval viability, fertility, vulval development, and normal locomotion.	Predicted to enable unfolded protein binding activity. Predicted to be involved in protein folding. Predicted to be located in cytoplasm. Predicted to be part of chaperonin-containing T-complex. Expressed in anchor cell\; head\; non-striated muscle\; and tail. Is an ortholog of human CCT7 (chaperonin containing TCP1 subunit 7).
WBGene00003231	mex-6	8434.32	mex-6 encodes a CCCH zinc-finger protein highly similar to MEX-5 that functions with MEX-5 to affect embryonic viability, establish soma germline asymmetry in embryos and establish PIE-1, MEX-1, and POS-1 asymmetry in embryos, and also affects formation of intestinal cells\; MEX-6 and MEX-5 may act downstream of the PAR proteins.	Enables mRNA 3'-UTR binding activity\; protein domain specific binding activity\; and protein kinase binding activity. Involved in regulation of protein localization. Located in P granule. Expressed in AB\; ABa\; ABp\; and germ line.
WBGene00018811	pmt-2	8419.81	pmt-2 encodes an experimentally validated N-methyltransferase required for phosphocholine biosynthesis and viability\; PMT-2 lacks known mammalian orthologs, but has orthologs in parasitic nematodes, fish, amphibians, echinoderms, plants, alveolata, and bacteria\; PMT-2 is distantly paralogous to PMT-1\; PMT-2 has a single C-terminal methyltransferase domain, unlike plant enzymes that have two ta…	Enables phosphatidyl-N-methylethanolamine N-methyltransferase activity. Involved in phosphatidylcholine biosynthetic process. Is an ortholog of human TMT1A (thiol methyltransferase 1A) and TMT1B (thiol methyltransferase 1B).
WBGene00010988	metr-1	8400.53	metr-1 encodes a protein orthologous to the human gene Methionine synthase (MTR), which is involved in the conversion of homocysteine to form methionine.	Predicted to enable methionine synthase activity. Predicted to be involved in homocysteine metabolic process\; methionine biosynthetic process\; and tetrahydrofolate metabolic process. Predicted to be located in cytosol. Used to study type 2 diabetes mellitus. Human ortholog(s) of this gene implicated in several diseases, including IgA glomerulonephritis\; artery disease (multiple)\; and hematolo…
WBGene00007433	swsn-7	8399.64	N.A.	Predicted to enable DNA binding activity. Predicted to be involved in chromatin remodeling. Predicted to be part of brahma complex. Used to study alcohol use disorder. Human ortholog(s) of this gene implicated in Coffin-Siris syndrome 6 and gastrointestinal system cancer (multiple). Is an ortholog of human ARID2 (AT-rich interaction domain 2).
WBGene00013038	ani-1	8338.92	ani-1 encodes one of three C. elegans anillins\; ANI-1 activity is required in the early embryo for cortical contractile events, including polar body extrusion, membrane ruffling, and pseudocleavage\; at later stages of development, ANI-1 also plays a role in cuticle formation, coordinated locomotion, vulval development, and male tail formation\; in regulating cortical events, ANI-1 appears to fu…	Enables actin filament binding activity\; microtubule binding activity\; and small GTPase binding activity. Involved in several processes, including cytoskeleton organization\; first cell cycle pseudocleavage\; and nematode male tail tip morphogenesis. Located in several cellular components, including cleavage furrow\; growth cone\; and midbody. Expressed in several structures, including QL.a\; Q…
WBGene00045336	nssp-67	8337.87	N.A.	Predicted to be involved in neuropeptide signaling pathway.
WBGene00003751	nlp-13	8314.68	nlp-13 encodes a predicted neuropeptide of the MSFamide family\; expressed primarily in neurons or in the endocrine\/secretory cells, and expression includes pharyngeal neurons that modulate pharyngeal pumping of food.	Predicted to be involved in neuropeptide signaling pathway. Predicted to be located in extracellular region. Expressed in several structures, including intestine\; pharyngeal neurons\; spermatheca\; tail\; and vulva.
WBGene00017180	nssp-14	8299.61	N.A.	Enriched in nerve ring neurons and neurons based on RNA-seq and single-cell RNA-seq studies. Is affected by several genes including cyc-1\; nuo-6\; and atfs-1 based on microarray and RNA-seq studies. Is affected by eight chemicals including stavudine\; Zidovudine\; and Psoralens based on RNA-seq studies.
WBGene00010806	M01E5.3	8299.56	N.A.	Enriched in AFD\; OLL\; PVD\; germ line\; and oocyte based on microarray and RNA-seq studies. Is affected by several genes including etr-1\; hsf-1\; and mrps-5 based on microarray\; tiling array\; and RNA-seq studies. Is affected by eight chemicals including Zidovudine\; silicon dioxide nanoparticle\; and paraquat based on RNA-seq and microarray studies. Is predicted to encode a protein with the …
WBGene00021890	Y54G2A.26	8296.01	N.A.	Enriched in several structures, including germ line\; head mesodermal cell\; neuronal sheath cell\; neurons\; and oocyte based on microarray\; RNA-seq\; and single-cell RNA-seq studies. Is affected by several genes including dys-1\; nuo-6\; and etr-1 based on tiling array\; RNA-seq\; microarray\; and proteomic studies. Is affected by eight chemicals including hydrogen sulfide\; Cry5B\; and rifamp…
WBGene00010957	nduo-6	8275.07	The nduo-6 gene resides on the mitochondrial chromosome, and encodes the protein NADH-ubiquinone oxidoreductase chain 6\; this is the C. elegans homolog of the core MT-ND6 of mitochondrial NADH:ubiquinone oxidoreductase (Complex I).	Predicted to enable NADH dehydrogenase (ubiquinone) activity. Predicted to be involved in mitochondrial electron transport, NADH to ubiquinone. Predicted to be located in mitochondrial membrane.
WBGene00002219	klp-7	8258.53	N.A.	Enables kinetochore binding activity. Involved in several processes, including egg-laying behavior\; microtubule cytoskeleton organization\; and regulation of cell cycle. Located in centrosome\; kinetochore\; and meiotic spindle pole. Expressed in distal tip cell\; neurons\; seam cell\; and tail. Human ortholog(s) of this gene implicated in colorectal cancer and complex cortical dysplasia with ot…
WBGene00017984	gmpr-1	8257.65	N.A.	Predicted to enable GMP reductase activity and metal ion binding activity. Predicted to be involved in purine nucleobase metabolic process and purine nucleotide metabolic process. Predicted to be part of GMP reductase complex. Is an ortholog of human GMPR (guanosine monophosphate reductase).
WBGene00006523	tam-1	8249.49	tam-1 encodes a broadly expressed nuclear protein with RING finger, B-box, and glutamine\/asparagine-rich domains that promotes signalling in the class B synthetic-multivulva gene pathway (which includes the lin-35\/RB gene), and also promotes the activity of genes in multicopy transgenic arrays\; the normal role of TAM-1's class B activity is presumably to inhibit RAS pathway activity in vulval …	Predicted to enable ubiquitin protein ligase activity. Involved in chromosome segregation\; negative regulation of vulval development\; and transcription initiation-coupled chromatin remodeling. Located in germ cell nucleus. Expressed in several structures, including germ line.
WBGene00001029	dnj-11	8247.86	dnj-11 encodes a protein containing DnaJ and Myb domains that is orthologousto the mammalian ZRF1\/MIDA1\/MPP11\/DNAJC2 family of ribosome-associated molecular chaperones\; in C. elegans, dnj-11 functions to regulate asymmetriccell division and mitotic spindle orientation in the NSM neuroblast andsubsequently the apoptotic death of the NSM sister cell\; in regulatingNSM sister cell death, DNJ-11 …	Predicted to enable Hsp70 protein binding activity and ribosome binding activity. Predicted to be involved in 'de novo' cotranslational protein folding. Located in cytosol. Expressed in several structures, including head\; muscle cell\; neurons\; and tail. Is an ortholog of human DNAJC2 (DnaJ heat shock protein family (Hsp40) member C2).
WBGene00021697	gcn-1	8246.46	gcn-1 encodes the C. elegans ortholog of the S. cerevisiae ribosome-associated protein Gcn1p\; GCN-1, along with ABCF-3, is required for maintaining the steady-state levels of phosphorylated eIF2alpha, and thus for the translational control of a number of mRNAs\; GCN-1 activity is required, in parallel to, or downstream of, the canonical apoptotic pathway, for apoptotic cell death of most somatic…	Predicted to enable protein kinase regulator activity. Involved in positive regulation of peptidyl-serine phosphorylation\; regulation of apoptotic process\; and regulation of translation. Acts upstream of with a positive effect on positive regulation of gene expression. Acts upstream of or within with a negative effect on negative regulation of translation. Predicted to be located in cytosolic r…
WBGene00006352	sur-6	8243.98	sur-6 encodes a regulatory (B) subunit of serine\/threonine protein phosphatase 2A (PP2A-B)\; sur-6 was initially identified in screens for mutations that suppress the Multivulva phenotype produced by an activated let-60\/Ras mutation and enhance the vulvaless and larval lethality phenotype of a hypomorphic lin-45\/Raf mutation\; in addition, RNAi experiments demonstrate that sur-6 activity is al…	Predicted to enable protein phosphatase regulator activity. Involved in embryo development\; nematode larval development\; and positive regulation of vulval development. Predicted to be located in cytosol. Predicted to be part of protein phosphatase type 2A complex. Human ortholog(s) of this gene implicated in Alzheimer's disease\; breast cancer\; spinocerebellar ataxia type 12\; and systemic lup…
WBGene00003030	lin-45	8173.13	The lin-45 gene encodes an ortholog of the vertebrate protein RAF which is required for larval viability, fertility and the induction of vulval cell fates.	Enables small GTPase binding activity. Involved in several processes, including defense response to Gram-positive bacterium\; intracellular signaling cassette\; and vulval development. Predicted to be located in cytoplasm. Expressed in head neurons and vulval precursor cell. Human ortholog(s) of this gene implicated in several diseases, including Noonan syndrome with multiple lentigines (multiple…
WBGene00022127	yop-1	8171.07	N.A.	Located in cortical endoplasmic reticulum. Expressed in head and tail. Human ortholog(s) of this gene implicated in retinitis pigmentosa 77. Is an ortholog of human REEP5 (receptor accessory protein 5) and REEP6 (receptor accessory protein 6).
WBGene00017864	pcca-1	8169.1	The F27D9.5 gene encodes an ortholog of the human gene PROPIONYL-COA CARBOXYLASE ALPHA SUBUNIT (PCCA), which when mutated leads to propionicaciduria, type I (OMIM:232000).	Predicted to enable propionyl-CoA carboxylase activity. Predicted to be involved in lipid catabolic process. Located in mitochondrion. Expressed in head and neurons. Used to study propionic acidemia. Human ortholog(s) of this gene implicated in propionic acidemia. Is an ortholog of human PCCA (propionyl-CoA carboxylase subunit alpha).
WBGene00011737	sqst-1	8158.82	sqst-1 encodes a protein with similarity to mammalian sequestosome 1(SQSTM1)\/p62, a signal transduction or adaptor protein involved in receptor-mediated signalling pathways\; SQST-1 is weakly expressed in embryos and exhibits a diffuse, cytoplasmic localization\; SQST-1 is selectively removed by autophagy during embryogenesis.	Predicted to enable K63-linked polyubiquitin modification-dependent protein binding activity and protein kinase C binding activity. Predicted to be involved in aggrephagy\; endosome organization\; and mitophagy. Located in cytoplasm. Expressed in several structures, including head\; hypodermal cell\; muscle cell\; tail\; and vulva. Used to study amyotrophic lateral sclerosis. Human ortholog(s) of…
WBGene00045388	lfor-1	8157.91	N.A.	Enriched in PDB based on single-cell RNA-seq studies. Is affected by several genes including etr-1\; prp-8\; and dpy-21 based on RNA-seq studies. Is affected by Tunicamycin based on microarray studies.
WBGene00003214	mel-32	8142.48	mel-32 encodes a serine hydroxymethyltransferase\; by homology, MEL-32 is predicted to catalyze the biochemical reaction that converts serine to glycine and in the process transfers a methyl group to tetrahydrofolate and, thus, into the one-carbon pool used for a variety of cellular metabolic processes\; in C. elegans MEL-32 activity is required maternally for embryonic development past the 100-c…	Predicted to enable glycine hydroxymethyltransferase activity and pyridoxal phosphate binding activity. Involved in embryo development. Located in mitochondrion. Human ortholog(s) of this gene implicated in breast cancer\; neurodevelopmental disorder with cardiomyopathy, spasticity, and brain abnormalities\; and ovarian cancer. Is an ortholog of human SHMT1 (serine hydroxymethyltransferase 1).
WBGene00000067	act-5	8136.2	act-5 encodes an ortholog of human cytoplasmic actin\; act-5 is required for formation of the terminal web and microvilli on the apical surface of intestinal cells\; act-5 also plays a role in mediating non-lytic exit of intracellular parasites from the intestine\; act-5 is expressed only in intestinal cells and in the excretory cell\; in the intestine, ACT-5 localizes to microvilli and the termi…	Involved in several processes, including larval feeding behavior\; microvillus assembly\; and positive regulation of eating behavior. Located in microvillar actin bundle and terminal web. Expressed in excretory cell\; gonad\; intestine\; pharyngeal-intestinal valve\; and rectal gland cell.
WBGene00006752	unc-13	8129.96	unc-13 encodes at least five protein isoforms that regulate neurotransmitter release by altering the conformation of syntaxin\; UNC-13 proteins are required for normal pharyngeal pumping and thrashing in liquid, normally short lifespan, normally large brood sizes, and full adult body sizes\; UNC-13 proteins have orthologs in vertebrates and Drosophila\; UNC-13 proteins are complex, with multiple …	Predicted to enable calmodulin binding activity and syntaxin-1 binding activity. Involved in regulation of multicellular organismal process\; spermatogenesis\; and synaptic vesicle exocytosis. Located in presynaptic active zone. Expressed in head neurons\; neurons\; tail neurons\; and ventral nerve cord. Human ortholog(s) of this gene implicated in amyotrophic lateral sclerosis. Is an ortholog of…
WBGene00006996	zyg-11	8121.78	zyg-11 encodes a protein containing four diverged leucine-rich repeats and an armadillo-like helical domain and is conserved in metazoa, but not found in Drosophila\; during development, ZYG-11 functions as the substrate-recognition subunit for a CUL-2-based ubiquitin-ligase complex that is required for a number of biological processes including progression through meiotic anaphase II, mitotic ch…	Enables cyclin binding activity. Involved in several processes, including anaphase-promoting complex-dependent catabolic process\; positive regulation of metaphase\/anaphase transition of meiotic cell cycle\; and sister chromosome movement towards spindle pole involved in meiotic sister chromatid segregation. Part of Cul2-RING ubiquitin ligase complex. Is an ortholog of human ZYG11B (zyg-11 famil…
WBGene00008720	F12F6.1	8117.82	N.A.	Predicted to be located in cytoplasm.
WBGene00004700	rsp-3	8114.34	rsp-3 encodes an ortholog of human SF2\/ASF and member of the SR protein family of nuclear phosphoproteins that are required for constitutive splicing and influence alternative splicing regulation\; rsp-3 affects the development of oocytes together with rsr-1, and is required for late embryonic viability\; SPK-1 binds directly to and phosphorylates the RS domain of RSP-3 in vitro\; the rsp-3 mRNA…	Predicted to enable RNA binding activity. Involved in embryo development. Predicted to be located in nuclear speck. Expressed in PVDL\; PVDR\; and gonad. Human ortholog(s) of this gene implicated in several diseases, including gastrointestinal system cancer (multiple)\; lung non-small cell carcinoma (multiple)\; and urinary system cancer (multiple). Is an ortholog of human SRSF1 (serine and argin…
WBGene00002783	let-607	8105.7	let-607 encodes an ortholog of the Cyclic AMP-responsive Element-Binding (CREB) family of transcription factors.	Enables RNA polymerase II cis-regulatory region sequence-specific DNA binding activity. Involved in several processes, including protein folding\; regulation of IRE1-mediated unfolded protein response\; and regulation of distal tip cell migration. Located in chromatin. Expressed in several structures, including coelomocyte\; excretory cell\; gonad\; pseudocoelom\; and somatic cell.
WBGene00014115	gld-4	8083.49	gld-4 encodes a noncanonical poly(A) polymerase orthologous to Saccharomyces cerevisiae Trf4\/5p\; GLD-4 activity is required for early meiotic progression of male and female gametes in the absence of GLD-2 and for regulation of gld-1 mRNA levels\; GLD-4 physically interacts with GLS-1 which stimulates GLD-4 poly(A) polymerase activity in vivo\; GLD-4 is expressed predominantly in germ cells and …	Enables poly(A) RNA polymerase activity. Involved in cytosolic mRNA polyadenylation and positive regulation of meiotic cell cycle. Located in P granule. Expressed in Z2\; Z3\; and germ line. Is an ortholog of human TENT4A (terminal nucleotidyltransferase 4A) and TENT4B (terminal nucleotidyltransferase 4B).
WBGene00013270	Y57A10A.31	8082.03	N.A.	Predicted to enable ubiquitin binding activity and ubiquitin-protein transferase activity. Predicted to be involved in proteasome-mediated ubiquitin-dependent protein catabolic process and protein linear polyubiquitination. Predicted to be part of LUBAC complex. Human ortholog(s) of this gene implicated in Gordon Holmes syndrome. Is an ortholog of human RNF216 (ring finger protein 216).
WBGene00002915	let-805	8073.2	let-805 encodes myotactin, a novel single-transmembrane protein containing extracellular fibronectin repeats\; genetic analyses indicate that LET-805 is essential for proper association between hypodermal fibrous organelles and the contractile apparatus of muscle cells\; LET-805 is expressed in hypodermal cells and in the pharynx and localizes to basolateral membranes.	Predicted to enable cytokine binding activity and cytokine receptor activity. Involved in hemidesmosome assembly. Located in hemidesmosome. Expressed in hypodermal cell\; hypodermis\; pharynx\; touch receptor neurons\; and uterine seam cell. Human ortholog(s) of this gene implicated in Ehlers-Danlos syndrome classic-like 1 and vesicoureteral reflux. Is an ortholog of human TNXB (tenascin XB).
WBGene00011560	T07C4.3	8067.07	N.A.	Enriched in several structures, including RIC\; distal tip cell\; germ line\; head mesodermal cell\; and pharyngeal cell based on tiling array\; RNA-seq\; single-cell RNA-seq\; and microarray studies. Is affected by several genes including nuo-6\; atfs-1\; and etr-1 based on microarray\; RNA-seq\; and proteomic studies. Is affected by fifteen chemicals including bisphenol S\; Alovudine\; and stav…
WBGene00006436	ttn-1	8038.27	ttn-1, through multiple splicing, encodes at least six protein isoformsthat are orthologs of titin (OMIM:188840, mutated in cardiomyopathy ortibial muscular dystrophy), with the three largest isoforms being 2.2MDa, 1.2 MDa and 301 kDa\; TTN-1 isoforms are expressed in body wall andvulval muscle, localized to the centers of I-bands, with the two largestisoforms expressed in all muscles except phar…	Enables actin filament binding activity and myosin binding activity. Predicted to be involved in chromatin remodeling and protein phosphorylation. Located in A band and I band. Expressed in muscle cell.
WBGene00020102	R148.3	7992.74	N.A.	Predicted to enable DNA binding activity. Predicted to be located in cytoplasm. Expressed in body wall musculature\; neurons\; and pharynx.
WBGene00021351	eif-2alpha	7988.6	N.A.	Predicted to enable ribosome binding activity and translation initiation factor activity. Predicted to be involved in translational initiation. Predicted to be part of eukaryotic 48S preinitiation complex and eukaryotic translation initiation factor 2 complex. Human ortholog(s) of this gene implicated in Alzheimer's disease. Is an ortholog of human EIF2S1 (eukaryotic translation initiation factor…
WBGene00001194	egl-27	7982.3	egl-27 encodes, along with lin-40, one of two C. elegans homologs of human MTA1 (metastasis-associated protein), part of a nucleosome remodeling and histone deacetylation (NURD) complex\; in conjunction with its paralog egr-1, egl-27 is required for proper organization in all parts of the embryo, and for the embryonic expression of hlh-8\; egl-27 activity is also required for transdifferentiation…	Enables RNA polymerase II-specific DNA-binding transcription factor binding activity\; chromatin binding activity\; and enzyme binding activity. Involved in several processes, including egg-laying behavior\; hemidesmosome assembly\; and nematode male tail tip morphogenesis. Located in nucleus. Expressed in several structures, including Y cell\; intestinal cell\; neurons\; pharynx\; and somatic go…
WBGene00002238	kars-1	7959.68	N.A.	Predicted to enable lysine-tRNA ligase activity and tRNA binding activity. Involved in several processes, including determination of adult lifespan\; positive regulation of nematode larval development\; and regulation of macromolecule metabolic process. Predicted to be located in mitochondrion. Predicted to be part of aminoacyl-tRNA synthetase multienzyme complex. Expressed in tail. Human ortholo…
WBGene00013580	Y79H2A.3	7953.26	The protein product of this gene is predicted to contain a glutamine\/asparagine (Q\/N)-rich ('prion') domain, by the algorithm of Michelitsch and Weissman (as of the WS77 release of WormBase, i.e., in wormpep77).	Enriched in several structures, including ABalppappa\; ABarappppa\; germ line\; neurons\; and oocyte based on microarray\; RNA-seq\; and single-cell RNA-seq studies. Is affected by several genes including cyc-1\; etr-1\; and hsf-1 based on microarray\; RNA-seq\; and proteomic studies. Is affected by nine chemicals including rotenone\; metformin\; and Sirolimus based on RNA-seq and microarray stud…
WBGene00012097	abcf-2	7947.48	N.A.	Predicted to enable ATP binding activity. Expressed in head. Is an ortholog of human ABCF2 (ATP binding cassette subfamily F member 2) and ABCF2-H2BK1 (ABCF2-H2BK1 readthrough).
WBGene00000865	cyb-1	7947.07	cyb-1 encodes a cyclin B homolog that appears to be required both for embryogenesis (via maternally encoded CYB-1) and for postembryonic development and fertility (via zygotically encoded CYB-1)\; removing maternal product in cyb-1(RNAi) embryos causes multiple nuclei, and affected embryos arrest development at an early embryonic stage.	Enables cyclin-dependent protein serine\/threonine kinase regulator activity and ubiquitin protein ligase binding activity. Involved in mitotic cell cycle\; oocyte maturation\; and positive regulation of protein phosphorylation. Located in cytoplasm and nucleus. Expressed in germ cell\; male gonad\; and oocyte. Used to study cardiovascular system disease. Human ortholog(s) of this gene implicated…
WBGene00004178	prg-1	7937.07	prg-1 encodes a novel, basic protein that is one of two C. elegans members of the Piwi subfamily of highly conserved Argonaut\/Piwi proteins\; during development, PRG-1 activity is essential for successful gametogenesis, normal levels of fertility, and accumulation of 21 U-RNAs (piRNAs), small RNAs expressed in the germ line\; in addition, PRG-1 appears to act upstream of an siRNA pathway to regu…	Enables 21U-RNA binding activity. Involved in 21U-RNA metabolic process\; gamete generation\; and positive regulation of mitotic nuclear division. Located in P granule. Expressed in germ line and in male. Is an ortholog of human PIWIL1 (piwi like RNA-mediated gene silencing 1) and PIWIL3 (piwi like RNA-mediated gene silencing 3).
WBGene00009087	F23D12.3	7936.94	N.A.	Enriched in BAG\; intestine\; and neurons based on tiling array\; RNA-seq\; single-cell RNA-seq\; and microarray studies. Is affected by several genes including cyc-1\; nuo-6\; and mut-16 based on microarray and RNA-seq studies. Is affected by ten chemicals including rotenone\; D-glucose\; and rifampin based on RNA-seq and microarray studies. Is predicted to encode a protein with the following do…
WBGene00002250	lap-2	7930.5	The lap-2 gene encodes a homolog of the zinc metalloprotease leucine aminopeptidase LAP.	Predicted to enable peptidase activity. Predicted to be involved in proteolysis. Predicted to be located in cytoplasm.
WBGene00017641	csr-1	7930.17	csr-1 encodes, by alternative splicing, two isoforms of an Argonaute protein required for chromosome segregation, embryonic viability, Slicer activity induced by secondary siRNAs, and (partially) for germline RNAi\; csr-1(RNAi) embryos are generally inviable, with disordered metaphase chromosomes and anaphase DNA bridges\; CSR-1 is found in secondary-type siRNA\/Slicer complexes, and isolated rec…	Enables endoribonuclease activity, cleaving siRNA-paired mRNA. Involved in P granule assembly\; mitotic sister chromatid segregation\; and siRNA-mediated gene silencing by mRNA destabilization. Located in P granule\; condensed nuclear chromosome\; and metaphase plate. Expressed in several structures, including germ line\; intestine\; somatic cell\; spermatocyte\; and in male.
WBGene00012973	spat-2	7929.82	SPAT-2 encodes an unfamiliar protein with no obvious homologs outside ofnematodes, and with several stretches of low-complexity sequence thatmay be nonglobular\; SPAT-2 is specifically required for PARprotein-dependent cell-polarity\; as with par-3, par-6, pkc-3, andcdc-42, RNAi of spat-2 suppresses the embryonic lethality ofpar-2(it5ts) at restrictive temperature.	Enriched in germ line\; germline precursor cell\; head mesodermal cell\; and neurons based on microarray\; RNA-seq\; and single-cell RNA-seq studies. Is affected by several genes including cyc-1\; nuo-6\; and atf-7 based on microarray\; tiling array\; proteomic\; and RNA-seq studies. Is affected by eighteen chemicals including rotenone\; Cry5B\; and Alovudine based on RNA-seq and microarray studi…
WBGene00019537	K08D12.3	7929.29	K08D12.3 is orthologous to human ZNF9 (CNBP\; OMIM:116955, mutated in myotonic dystrophy type 2) and ZCCHC13\; like ZNF9, K08D12.3 is most conspicuously expressed in muscle cells\; K08D12.3 is required for normal locomotion in mass RNAi assays, as well as for fertility, embryonic and larval viability, and general health.	Predicted to enable mRNA binding activity\; single-stranded RNA binding activity\; and translation regulator activity. Predicted to be involved in positive regulation of cytoplasmic translation. Predicted to be located in cytoplasm. Expressed in head muscle and pharyngeal muscle cell. Human ortholog(s) of this gene implicated in myotonic dystrophy type 2. Is an ortholog of human ZCCHC13 (zinc fin…
WBGene00001609	glp-1	7928.79	glp-1 encodes an N-glycosylated transmembrane protein that, along with LIN-12, comprises one of two C. elegans members of the LIN-12\/Notch family of receptors\; from the N- to the C-terminus, GLP-1 is characterized by ten extracellular EGF-like repeats, three LIN-12\/Notch repeats, a CC-linker, a transmembrane domain, a RAM domain, six intracellular ankyrin repeats, and a PEST sequence\; in C. e…	Enables RNA polymerase II-specific DNA-binding transcription factor binding activity and transcription coactivator activity. Involved in several processes, including cytoplasmic streaming\; positive regulation of cell population proliferation\; and regulation of gene expression. Located in cytoplasm\; endomembrane system\; and lateral plasma membrane. Part of RNA polymerase II transcription regul…
WBGene00012121	T28C6.7	7924.67	N.A.	Expressed in tail.
WBGene00010478	dkc-1	7920.62	The K01G5.5 gene encodes an ortholog of human DYSKERIN (DKC1\; OMIM:300126), which when mutated leads to X-linked dyskeratosis congenita (OMIM:305000)\; the K01G5.5 protein is predicted to be mitochondrial with 68\% accuracy.	Predicted to enable pseudouridine synthase activity. Predicted to be involved in box H\/ACA sno(s)RNA 3'-end processing and pseudouridine synthesis. Predicted to be located in nucleolus. Predicted to be part of box H\/ACA snoRNP complex. Human ortholog(s) of this gene implicated in X-linked dyskeratosis congenita and aplastic anemia. Is an ortholog of human DKC1 (dyskerin pseudouridine synthase 1…
WBGene00001177	egl-8	7913.69	egl-8 encodes a phospholipase C beta\; egl-8 activity is required for pharyngeal pumping, defecation, activity levels, and innate immunity\; egl-8 is genetically downstream of egl-30 with respect to aldicarb-induced paralysis, and is expressed in most or all neurons, with the strongest staining in the head and tail ganglia, and in the intestine.	Predicted to enable phosphatidylinositol phospholipase C activity. Involved in several processes, including positive regulation of acetylcholine secretion, neurotransmission\; positive regulation of axon regeneration\; and taxis. Located in plasma membrane. Expressed in intestine\; nervous system\; non-striated muscle\; and vas deferens. Used to study nicotine dependence. Is an ortholog of human …
WBGene00014667	C06A1.4	7902	N.A.	Enriched in germ line and oocyte based on RNA-seq studies. Is affected by several genes including cyc-1\; nuo-6\; and atp-2 based on microarray and RNA-seq studies. Is affected by fifteen chemicals including rotenone\; manganese chloride\; and Alovudine based on RNA-seq and microarray studies.
WBGene00003687	nhr-97	7901.39	N.A.	Predicted to enable DNA-binding transcription factor activity\; sequence-specific DNA binding activity\; and zinc ion binding activity. Predicted to be involved in regulation of DNA-templated transcription. Predicted to be located in nucleus.
WBGene00007385	atp-5	7883.35	N.A.	Predicted to enable proton transmembrane transporter activity. Predicted to contribute to proton-transporting ATP synthase activity, rotational mechanism. Predicted to be involved in proton motive force-driven ATP synthesis. Predicted to be located in mitochondrial inner membrane. Predicted to be part of proton-transporting ATP synthase complex, coupling factor F(o). Is an ortholog of human ATP5P…
WBGene00001746	gsk-3	7863.52	gsk-3 encodes the C. elegans glycogen synthase kinase ortholog\; during embryonic development, GSK-3 functions in the Wnt signaling pathway that restricts specification of mesendodermal tissue to the appropriate blastomere\; GSK-3 also functions in a Wnt pathway that regulates anteroposterior axon guidance\; GSK-3 plays a role in regulating the oocyte-to-embryo transition, by phosphorylating and …	Enables protein serine\/threonine kinase activity. Involved in several processes, including engulfment of apoptotic cell\; left\/right axis specification\; and regulation of cellular component organization. Predicted to be located in cytosol and nucleus. Expressed in distal tip cell\; seam cell\; and sperm. Human ortholog(s) of this gene implicated in several diseases, including Alzheimer's disea…
WBGene00009113	maph-1.2	7845.74	N.A.	Predicted to enable actin binding activity and microtubule binding activity. Predicted to be involved in microtubule cytoskeleton organization\; neuron projection development\; and regulation of microtubule depolymerization. Predicted to be located in several cellular components, including cytosol\; microtubule\; and somatodendritic compartment. Predicted to be part of microtubule associated comp…
WBGene00019971	ergo-1	7842.52	ergo-1 encodes an Argonaute protein\; ERGO-1 is required for somatic gene regulation via the production or stabilization of endogenous (endo)-siRNAs, specifically the initial class of endo-siRNAs which are 26-nt, 5'-monophosphorylated, 5'-G-enriched antisense siRNAs\; ERGO-1 activity is also required for the subcellular redistribution of the NRDE-3 Argonaute protein which, upon binding secondary …	Enables DEAD\/H-box RNA helicase binding activity and siRNA binding activity. Involved in regulatory ncRNA-mediated post-transcriptional gene silencing and siRNA processing. Located in cytoplasm. Expressed in several structures, including gonad\; neurons\; pharynx\; seam cell\; and vulva.
WBGene00010056	smc-6	7836.73	N.A.	Predicted to enable damaged DNA binding activity and single-stranded DNA binding activity. Predicted to be involved in double-strand break repair via homologous recombination. Located in condensed nuclear chromosome and nucleoplasm. Is an ortholog of human SMC6 (structural maintenance of chromosomes 6).
WBGene00002225	klp-15	7833.72	N.A.	Enables minus-end-directed microtubule motor activity. Involved in chromosome segregation and microtubule-based movement. Predicted to be located in cytoplasm\; microtubule cytoskeleton\; and nucleus. Predicted to be part of kinesin complex. Expressed in germ line and hypodermis. Is an ortholog of human KIFC1 (kinesin family member C1).
WBGene00021534	mvk-1	7833.3	mvk-1 encodes an ortholog of the human gene MEVALONATE KINASE (MVK), which when mutated leads to mevalonicaciduria (OMIM:251170).	Predicted to enable ATP binding activity and mevalonate kinase activity. Predicted to be involved in isopentenyl diphosphate biosynthetic process, mevalonate pathway. Located in cytosol. Expressed in head. Human ortholog(s) of this gene implicated in several diseases, including hyperimmunoglobulinemia D periodic fever syndrome\; mevalonic aciduria\; and porokeratosis. Is an ortholog of human MVK …
WBGene00004755	sec-24.1	7817.54	sec-24.1 encodes one of two C. elegans Sec24 homologs\; in Saccharomyces cerevisiae, Sec24 is a member of the Sec24-Sec23 subunit of the COPII coat complex, assembly of which is essential for the first step of secretory protein transport from the endoplasmic reticulum (ER) to the Golgi\; by homology with Sec24, SEC-24.1 is predicted to facilitate vesicle cargo selection, and likely contains multi…	Predicted to enable SNARE binding activity and zinc ion binding activity. Predicted to be involved in COPII-coated vesicle cargo loading. Predicted to be located in endoplasmic reticulum exit site. Predicted to be part of COPII vesicle coat. Expressed widely. Human ortholog(s) of this gene implicated in Cole-Carpenter syndrome. Is an ortholog of human SEC24D (SEC24 homolog D, COPII coat complex c…
WBGene00002036	hum-2	7804.23	hum-2 encodes a class V unconventional myosin similar to human MYO5A, MYO5B and MYO5C.	Predicted to enable actin filament binding activity and microfilament motor activity. Predicted to be involved in actin filament organization. Predicted to be located in actin cytoskeleton\; cytoplasm\; and membrane. Predicted to be part of myosin complex. Expressed in DB1. Used to study Griscelli syndrome type 1. Human ortholog(s) of this gene implicated in Griscelli syndrome type 1\; microvillu…
WBGene00018193	F39C12.1	7800.38	N.A.	Predicted to be involved in cellular response to amino acid starvation and positive regulation of TORC1 signaling. Predicted to be located in cytoplasm. Is an ortholog of human MIOS (meiosis regulator for oocyte development).
WBGene00016170	tmem-131	7792.43	N.A.	Involved in collagen biosynthetic process. Located in endoplasmic reticulum membrane. Expressed in hypodermis\; intestine\; and neurons. Is an ortholog of human TMEM131 (transmembrane protein 131).
WBGene00004888	smo-1	7758.42	smo-1 encodes the C. elegans ortholog of SUMO, a small ubiquitin-like moiety that, when attached to protein substrates, regulates their subcellular localization and activity\; smo-1 is an essential gene: loss of its activity results in embryonic and larval lethality\; in addition, smo-1 mutants have defects in synaptonemal complex disassembly and bivalent formation, enhance meiotic defects of zhp…	Enables identical protein binding activity. Involved in several processes, including chromosome organization\; multicellular organismal locomotion\; and muscle cell cellular homeostasis. Predicted to be located in PML body. Expressed in several structures, including P3.p hermaphrodite\; P4.p hermaphrodite\; P8.p hermaphrodite\; hermaphrodite somatic gonadal cell\; and ventral nerve cord. Human or…
WBGene00003826	ntl-3	7754.17	ntl-3 is the ortholog of NOT3\/NOT5, a member of a protein complex also predicted to contain ccf-1\/Y56A3A.20 (CAF1\/POP2)\; ntl-3 is required for embryonic viability in mass RNAi assays.	Predicted to be involved in nuclear-transcribed mRNA poly(A) tail shortening. Predicted to be located in P-body. Predicted to be part of CCR4-NOT core complex. Is an ortholog of human CNOT3 (CCR4-NOT transcription complex subunit 3).
WBGene00018812	sumv-2	7746.45	sumv-2 encodes a protein with similarity to the KAT8 NLS3 non-enzymatic subunit of the mammalian KAT8\/MOF histone acetyltransferase complex.	Predicted to be involved in positive regulation of transcription by RNA polymerase II. Predicted to be part of NSL complex. Is an ortholog of human KANSL3 (KAT8 regulatory NSL complex subunit 3).
WBGene00001503	fum-1	7740.39	fum-1 is orthologous to human FUMARASE (FH\; OMIM:136850), which when mutated leads to fumarase deficiency\; FUM-1A and FUM-1B are predicted to be mitochondrial.	Predicted to enable fumarate hydratase activity. Predicted to be involved in fumarate metabolic process\; malate metabolic process\; and tricarboxylic acid cycle. Located in mitochondrion. Human ortholog(s) of this gene implicated in fumarase deficiency and lung non-small cell carcinoma. Is an ortholog of human FH (fumarate hydratase).
WBGene00000197	aars-2	7739.62	aars-2 encodes a predicted cytoplasmic alanyl-tRNA synthetase (AlaRS), a class II aminoacyl-tRNA synthetase that catalyzes the attachment of alanine to its cognate tRNA and is thus required for protein biosynthesis\; AARS-2 is essential for embryogenesis, and is required for fertility and a normal rate of postembryonic development\; AARS-2 expression is likely ubiquitous and detected in hypodermi…	Predicted to enable alanine-tRNA ligase activity and aminoacyl-tRNA editing activity. Predicted to be involved in alanyl-tRNA aminoacylation. Predicted to be located in mitochondrion. Expressed widely. Human ortholog(s) of this gene implicated in several diseases, including Charcot-Marie-Tooth disease axonal type 2N\; developmental and epileptic encephalopathy 29\; and nonphotosensitive trichothi…
WBGene00001860	him-1	7717.9	him-1 encodes a homolog of the conserved eukaryotic protein, SMC1, a member of the SMC (structural maintenance of chromosomes) superfamily that is required for embryonic viability, germline mitosis, chromosome pairing, and the segregation of mitotic chromosomes\; HIM-1 can interact with SMC-3 and is required for DPY-28 localization to meiotic chromosomes\; associates with the chromatin of transit…	Enables DNA binding activity. Involved in several processes, including chromosome segregation\; establishment of mitotic sister chromatid cohesion\; and response to radiation. Located in chromatin and nucleus. Part of MIS12\/MIND type complex and cohesin complex. Expressed in linker cell. Human ortholog(s) of this gene implicated in Cornelia de Lange syndrome 2\; congestive heart failure\; and de…
WBGene00022114	Y71F9AL.9	7714.4	N.A.	Enriched in Q cell\; anal depressor muscle\; distal tip cell\; germ line\; and intestine based on proteomic\; Chronogram\; single-cell RNA-seq\; and RNA-seq studies. Is affected by several genes including myrf-1\; myrf-2\; and mut-16 based on microarray\; RNA-seq\; proteomic\; and tiling array studies. Is affected by nine chemicals including silicon dioxide nanoparticle\; paraquat\; and Cisplatin…
WBGene00003947	pbs-1	7711.09	pbs-1 encodes a protease subunit with highest similarity to vertebrate proteasome subunit beta type 6 that affects fertility, embryonic viability, locomotion, and larval viability	Predicted to enable endopeptidase activity. Predicted to be involved in proteasome-mediated ubiquitin-dependent protein catabolic process. Predicted to be located in cytosol and nucleus. Predicted to be part of proteasome core complex, beta-subunit complex. Human ortholog(s) of this gene implicated in several diseases, including Huntington's disease\; autoimmune disease (multiple)\; and carcinoma…
WBGene00022800	ZK688.5	7700.84	N.A.	Predicted to enable misfolded protein binding activity and polyubiquitin modification-dependent protein binding activity. Predicted to be involved in ERAD pathway. Predicted to be part of BAT3 complex. Human ortholog(s) of this gene implicated in gastrointestinal stromal tumor\; lung non-small cell carcinoma\; and osteoarthritis. Is an ortholog of human BAG6 (BAG cochaperone 6).
WBGene00003746	nlp-8	7699.68	N.A.	Involved in sleep. Predicted to be located in extracellular region. Expressed in intestine\; neurons\; and pharynx.
WBGene00011146	pde-2	7689.56	N.A.	Predicted to enable 3',5'-cyclic-nucleotide phosphodiesterase activity and protein homodimerization activity. Involved in several processes, including determination of adult lifespan\; positive regulation of egg-laying behavior\; and regulation of cGMP-mediated signaling. Predicted to be located in several cellular components, including mitochondrion\; perinuclear region of cytoplasm\; and synapt…
WBGene00021005	ule-1	7676.75	W03F11.1 encodes a protein with three chitin-binding peritrophin-Adomains\; like CEJ-1 and CPG-2, W03F11.1 may participate in eggshellsynthesis and early embryonic development\; W03F11.1 is required forfertility in mass RNAi assays\; W03F11.1's multiple peritrophin-A domainsmight enable mechanical cross-linking of chitin.	Predicted to enable chitin binding activity. Predicted to be located in extracellular region.
WBGene00002275	lem-2	7658.42	lem-2 encodes the ortholog of the vertebrate LEM2 and MAN1 proteins and contains a LEM domain which is a defining 40 amino acid motif shared by a family of nuclear envelope proteins\; LEM family proteins bind to lamins and to the small inner nuclear membrane associated protein BAF\; LEM-2 provides an anchor by which chromosomes are attached to the nuclear membrane\; lem-2 together with the LEM do…	Enables chromatin DNA binding activity and lamin binding activity. Involved in several processes, including microtubule organizing center organization\; nuclear membrane reassembly\; and response to X-ray. Located in chromosome and nuclear envelope. Used to study Emery-Dreifuss muscular dystrophy and cataract 46 juvenile-onset. Human ortholog(s) of this gene implicated in Buschke-Ollendorff syndr…
WBGene00000102	akt-1	7658.21	akt-1 encodes an ortholog of the serine\/threonine kinase Akt\/PKB\; akt-1 genetically interacts with the insulin signaling pathway and functions to regulate such processes as dauer larval development and salt chemotaxis learning\; AKT-1 binds calmodulin in vitro in a calcium-dependent manner\; an AKT-1::GFP fusion protein is widely expressed beginning in late stage embryos and continuing through…	Enables calmodulin binding activity\; phosphatidylinositol-3,4,5-trisphosphate binding activity\; and protein serine\/threonine kinase activity. Involved in several processes, including determination of adult lifespan\; regulation of synaptic assembly at neuromuscular junction\; and signal transduction. Located in axon\; cytoplasmic side of plasma membrane\; and somatodendritic compartment. Part …
WBGene00014091	srlf-32	7627.7	N.A.	Enriched in amphid sheath cell\; pharyngeal gland cell\; and sensory neurons based on RNA-seq and single-cell RNA-seq studies. Is affected by several genes including cyc-1\; nuo-6\; and qui-1 based on microarray and RNA-seq studies. Is affected by twelve chemicals including aldicarb\; bisphenol A\; and procyanidin based on microarray and RNA-seq studies. Is predicted to encode a protein with the …
WBGene00000875	cyk-4	7604.7	cyk-4 encodes a Rho GAP (Rho guanosine triphosphatase (GTPase) activating protein)\; during development, cyk-4 is required for two different processes: 1) paternally provided CYK-4 regulates anterior-posterior polarity in the one-cell embryo by controlling the actomyosin cytoskeletal network, and 2) together with ZEN-4, CYK-4 is sufficient to promote formation of the large bundles of microtubules…	Enables GTPase activator activity. Involved in microtubule bundle formation involved in mitotic spindle midzone assembly\; mitotic cleavage furrow ingression\; and polar body extrusion after meiotic divisions. Located in mitotic spindle midzone and plasma membrane. Part of centralspindlin complex. Expressed in germ cell\; gonad\; and tail. Human ortholog(s) of this gene implicated in congenital d…
WBGene00006751	unc-11	7599.82	unc-11 encodes multiple isoforms of a clathrin-adaptor protein AP180 (OMIM:603025) that functions in clathrin-mediated endocytosis\; UNC-11 is essential for embryogenesis, locomotion, and pharyngeal pumping, and regulates neurotransmitter release by controlling vesicle trafficking and fusion\; UNC-11 is also required for localization of SNB-1\/synaptobrevin to synaptic vesicles, thus acting as a …	Predicted to enable SNARE binding activity\; clathrin heavy chain binding activity\; and phosphatidylinositol binding activity. Involved in several processes, including endocytosis\; necroptotic process\; and protein localization to postsynaptic membrane. Located in clathrin-coated pit and presynaptic membrane. Expressed in several structures, including epithelial cell\; excretory gland cell\; ph…
WBGene00018298	nlp-50	7591.69	N.A.	Predicted to be involved in neuropeptide signaling pathway.
WBGene00020481	gldi-2	7579.33	N.A.	Predicted to enable calcium ion binding activity. Predicted to be involved in endocytosis. Predicted to be located in plasma membrane. Human ortholog(s) of this gene implicated in several diseases, including Alzheimer's disease\; artery disease (multiple)\; autistic disorder\; and cerebellar ataxia, impaired intellectual development, and dysequilibrium syndrome 1. Is an ortholog of human LDLR (lo…
WBGene00004319	rbr-2	7573.82	rbr-2 encodes a histone H3 lysine 4 (H3K4) demethylase orthologous to budding yeast Jhd2p, Drosophila LID, and human JARID1A (OMIM:180202), JARID1B (OMIM:605393), JARID1C OMIM:314690, mutated in mental retardation), and JARID1D (OMIM:426000)\; RBR-2 regulates genome-wide levels of H3K4 trimethylation and is required in the germ line for normally short lifespan\; recombinant His-RBR-2 specifically…	Enables histone H3K4me\/H3K4me2\/H3K4me3 demethylase activity. Involved in determination of adult lifespan and regulation of vulval development. Located in nucleus. Expressed in several structures, including anchor cell and vulval precursor cell. Human ortholog(s) of this gene implicated in several diseases, including autoimmune disease of musculoskeletal system (multiple)\; gastrointestinal syst…
[truncated: 9,463 more rows]
